# Supplementary material for: Trends in disease incidence and survival and their effect on mortality in Scotland: nationwide cohort study of linked hospital admission and death records 2001–2016
Source: BMJ Open. 2020 Mar 25;10(3):e034299. doi: 10.1136/bmjopen-2019-034299 (PMC7170664; doi:10.1136/bmjopen-2019-034299)
Supplement: Supplementary data [file bmjopen-2019-034299supp009.xlsx]

## Sheet: Data
block	strat_level	birth_decade	burden	severity	se_severity	variable	beta	se	strat_var
ACT-DTH	-1	1915	NA	NA	NA	incidence	-0.068	0.0196759	none
ACT-DTH	-1	1915	NA	NA	NA	impact	-0.068	0.0196759	none
ACT-DTH	-1	1925	NA	NA	NA	incidence	0.124	0.0183897	none
ACT-DTH	-1	1925	NA	NA	NA	impact	0.124	0.0183897	none
ACT-DTH	-1	1935	NA	NA	NA	incidence	0.274	0.0173358	none
ACT-DTH	-1	1935	NA	NA	NA	impact	0.274	0.0173358	none
ACT-DTH	-1	1945	NA	NA	NA	incidence	0.323	0.015448	none
ACT-DTH	-1	1945	NA	NA	NA	impact	0.323	0.015448	none
ACT-DTH	-1	1955	NA	NA	NA	incidence	0.299	0.00997	none
ACT-DTH	-1	1955	NA	NA	NA	impact	0.299	0.00997	none
EST-DTH	-1	1915	1.3825	0.186608	0.0416524	incidence	0.00812434	0.0106938	none
EST-DTH	-1	1915	1.3825	0.186608	0.0416524	impact	0.194732	0.0138336	none
EST-DTH	-1	1925	1.3825	0.186608	0.0416524	incidence	0.120179	0.00829215	none
EST-DTH	-1	1925	1.3825	0.186608	0.0416524	impact	0.306728	0.0120611	none
EST-DTH	-1	1935	1.3825	0.186608	0.0416524	incidence	0.171198	0.0073964	none
EST-DTH	-1	1935	1.3825	0.186608	0.0416524	impact	0.357353	0.0114648	none
EST-DTH	-1	1945	1.3825	0.186608	0.0416524	incidence	0.174966	0.00637668	none
EST-DTH	-1	1945	1.3825	0.186608	0.0416524	impact	0.361573	0.0108477	none
EST-DTH	-1	1955	1.3825	0.186608	0.0416524	incidence	0.116653	0.00404314	none
EST-DTH	-1	1955	1.3825	0.186608	0.0416524	impact	0.30326	0.00966222	none
J09-J18	-1	1915	0.09388	0.1548	0.0359	incidence	-0.20744	0.0433111	none
J09-J18	-1	1915	0.09388	0.1548	0.0359	impact	-0.05264	0.0562553	none
J09-J18	-1	1925	0.09388	0.1548	0.0359	incidence	-0.1417	0.0388434	none
J09-J18	-1	1925	0.09388	0.1548	0.0359	impact	0.0131	0.0528925	none
J09-J18	-1	1935	0.09388	0.1548	0.0359	incidence	-0.1213	0.0358872	none
J09-J18	-1	1935	0.09388	0.1548	0.0359	impact	0.0335	0.0507612	none
J09-J18	-1	1945	0.09388	0.1548	0.0359	incidence	-0.1787	0.0312173	none
J09-J18	-1	1945	0.09388	0.1548	0.0359	impact	-0.0239	0.0475745	none
J09-J18	-1	1955	0.09388	0.1548	0.0359	incidence	-0.2161	0.01972	none
J09-J18	-1	1955	0.09388	0.1548	0.0359	impact	-0.0613	0.0409596	none
R00-R09	-1	1915	0.08403	0.2337	0.0402	incidence	-0.051	0.0326741	none
R00-R09	-1	1915	0.08403	0.2337	0.0402	impact	0.1827	0.0518039	none
R00-R09	-1	1925	0.08403	0.2337	0.0402	incidence	0.079	0.0229584	none
R00-R09	-1	1925	0.08403	0.2337	0.0402	impact	0.3127	0.046294	none
R00-R09	-1	1935	0.08403	0.2337	0.0402	incidence	0.19984	0.0187579	none
R00-R09	-1	1935	0.08403	0.2337	0.0402	impact	0.43354	0.044361	none
R00-R09	-1	1945	0.08403	0.2337	0.0402	incidence	0.25636	0.0147411	none
R00-R09	-1	1945	0.08403	0.2337	0.0402	impact	0.49006	0.0428175	none
R00-R09	-1	1955	0.08403	0.2337	0.0402	incidence	0.1418	0.0087	none
R00-R09	-1	1955	0.08403	0.2337	0.0402	impact	0.3755	0.0411306	none
C30-C39	-1	1915	0.084	0.2096	0.0466	incidence	-0.26062	0.075528	none
C30-C39	-1	1915	0.084	0.2096	0.0466	impact	-0.05102	0.0887471	none
C30-C39	-1	1925	0.084	0.2096	0.0466	incidence	0.1066	0.05192	none
C30-C39	-1	1925	0.084	0.2096	0.0466	impact	0.3162	0.0697657	none
C30-C39	-1	1935	0.084	0.2096	0.0466	incidence	0.2727	0.04692	none
C30-C39	-1	1935	0.084	0.2096	0.0466	impact	0.4823	0.066129	none
C30-C39	-1	1945	0.084	0.2096	0.0466	incidence	0.3708	0.0422384	none
C30-C39	-1	1945	0.084	0.2096	0.0466	impact	0.5804	0.0628939	none
C30-C39	-1	1955	0.084	0.2096	0.0466	incidence	0.4629	0.0278	none
C30-C39	-1	1955	0.084	0.2096	0.0466	impact	0.6725	0.0542623	none
R10-R19	-1	1915	0.08308	0.1173	0.0444	incidence	0.15981	0.0375542	none
R10-R19	-1	1915	0.08308	0.1173	0.0444	impact	0.27711	0.0581522	none
R10-R19	-1	1925	0.08308	0.1173	0.0444	incidence	0.17	0.0265189	none
R10-R19	-1	1925	0.08308	0.1173	0.0444	impact	0.2873	0.0517166	none
R10-R19	-1	1935	0.08308	0.1173	0.0444	incidence	0.1744	0.0214742	none
R10-R19	-1	1935	0.08308	0.1173	0.0444	impact	0.2917	0.0493204	none
R10-R19	-1	1945	0.08308	0.1173	0.0444	incidence	0.1442	0.0166938	none
R10-R19	-1	1945	0.08308	0.1173	0.0444	impact	0.2615	0.0474346	none
R10-R19	-1	1955	0.08308	0.1173	0.0444	incidence	0.0644	0.00982	none
R10-R19	-1	1955	0.08308	0.1173	0.0444	impact	0.1817	0.045473	none
R50-R69	-1	1915	0.07855	0.0259	0.0252	incidence	0.00907	0.0346598	none
R50-R69	-1	1915	0.07855	0.0259	0.0252	impact	0.03497	0.0428525	none
R50-R69	-1	1925	0.07855	0.0259	0.0252	incidence	0.1971	0.0298734	none
R50-R69	-1	1925	0.07855	0.0259	0.0252	impact	0.223	0.0390827	none
R50-R69	-1	1935	0.07855	0.0259	0.0252	incidence	0.1963	0.0267165	none
R50-R69	-1	1935	0.07855	0.0259	0.0252	impact	0.2222	0.0367261	none
R50-R69	-1	1945	0.07855	0.0259	0.0252	incidence	0.131	0.0220782	none
R50-R69	-1	1945	0.07855	0.0259	0.0252	impact	0.1569	0.0335036	none
R50-R69	-1	1955	0.07855	0.0259	0.0252	incidence	0.0154	0.01333	none
R50-R69	-1	1955	0.07855	0.0259	0.0252	impact	0.0413	0.0285084	none
C15-C26	-1	1915	0.07666	0.3954	0.036	incidence	0.093	0.0562296	none
C15-C26	-1	1915	0.07666	0.3954	0.036	impact	0.4884	0.0667665	none
C15-C26	-1	1925	0.07666	0.3954	0.036	incidence	0.196	0.0443227	none
C15-C26	-1	1925	0.07666	0.3954	0.036	impact	0.5914	0.0571008	none
C15-C26	-1	1935	0.07666	0.3954	0.036	incidence	0.26561	0.0401384	none
C15-C26	-1	1935	0.07666	0.3954	0.036	impact	0.66101	0.0539174	none
C15-C26	-1	1945	0.07666	0.3954	0.036	incidence	0.33219	0.0354488	none
C15-C26	-1	1945	0.07666	0.3954	0.036	impact	0.72759	0.0505235	none
C15-C26	-1	1955	0.07666	0.3954	0.036	incidence	0.2882	0.02297	none
C15-C26	-1	1955	0.07666	0.3954	0.036	impact	0.6836	0.0427039	none
I30-I52	-1	1915	0.07206	0.1802	0.0209	incidence	0.126	0.0381935	none
I30-I52	-1	1915	0.07206	0.1802	0.0209	impact	0.3062	0.0435379	none
I30-I52	-1	1925	0.07206	0.1802	0.0209	incidence	0.276	0.0333997	none
I30-I52	-1	1925	0.07206	0.1802	0.0209	impact	0.4562	0.0393999	none
I30-I52	-1	1935	0.07206	0.1802	0.0209	incidence	0.33362	0.0307885	none
I30-I52	-1	1935	0.07206	0.1802	0.0209	impact	0.51382	0.0372121	none
I30-I52	-1	1945	0.07206	0.1802	0.0209	incidence	0.30278	0.0270862	none
I30-I52	-1	1945	0.07206	0.1802	0.0209	impact	0.48298	0.0342122	none
I30-I52	-1	1955	0.07206	0.1802	0.0209	incidence	0.1746	0.01735	none
I30-I52	-1	1955	0.07206	0.1802	0.0209	impact	0.3548	0.0271631	none
C76-C80	-1	1915	0.06525	0.3658	0.0653	incidence	0.03395	0.0767162	none
C76-C80	-1	1915	0.06525	0.3658	0.0653	impact	0.39975	0.100745	none
C76-C80	-1	1925	0.06525	0.3658	0.0653	incidence	0.1104	0.0569137	none
C76-C80	-1	1925	0.06525	0.3658	0.0653	impact	0.4762	0.0866214	none
C76-C80	-1	1935	0.06525	0.3658	0.0653	incidence	0.2055	0.050143	none
C76-C80	-1	1935	0.06525	0.3658	0.0653	impact	0.5713	0.0823311	none
C76-C80	-1	1945	0.06525	0.3658	0.0653	incidence	0.2557	0.0433663	none
C76-C80	-1	1945	0.06525	0.3658	0.0653	impact	0.6215	0.0783883	none
C76-C80	-1	1955	0.06525	0.3658	0.0653	incidence	0.2683	0.02766	none
C76-C80	-1	1955	0.06525	0.3658	0.0653	impact	0.6341	0.0709166	none
Z40-Z54	-1	1915	0.06138	0.2963	0.0353	incidence	0.11957	0.0402703	none
Z40-Z54	-1	1915	0.06138	0.2963	0.0353	impact	0.41587	0.0535518	none
Z40-Z54	-1	1925	0.06138	0.2963	0.0353	incidence	-0.0005	0.0272222	none
Z40-Z54	-1	1925	0.06138	0.2963	0.0353	impact	0.2958	0.0445773	none
Z40-Z54	-1	1935	0.06138	0.2963	0.0353	incidence	-0.0261	0.0224321	none
Z40-Z54	-1	1935	0.06138	0.2963	0.0353	impact	0.2702	0.0418245	none
Z40-Z54	-1	1945	0.06138	0.2963	0.0353	incidence	-0.0263	0.0180662	none
Z40-Z54	-1	1945	0.06138	0.2963	0.0353	impact	0.27	0.0396545	none
Z40-Z54	-1	1955	0.06138	0.2963	0.0353	incidence	-0.0625	0.01091	none
Z40-Z54	-1	1955	0.06138	0.2963	0.0353	impact	0.2338	0.0369475	none
I60-I69	-1	1915	0.05735	0.2033	0.0338	incidence	0.1062	0.0453927	none
I60-I69	-1	1915	0.05735	0.2033	0.0338	impact	0.3095	0.0565945	none
I60-I69	-1	1925	0.05735	0.2033	0.0338	incidence	0.3056	0.0403299	none
I60-I69	-1	1925	0.05735	0.2033	0.0338	impact	0.5089	0.0526207	none
I60-I69	-1	1935	0.05735	0.2033	0.0338	incidence	0.3354	0.0372325	none
I60-I69	-1	1935	0.05735	0.2033	0.0338	impact	0.5387	0.0502862	none
I60-I69	-1	1945	0.05735	0.2033	0.0338	incidence	0.2974	0.0324711	none
I60-I69	-1	1945	0.05735	0.2033	0.0338	impact	0.5007	0.0468701	none
I60-I69	-1	1955	0.05735	0.2033	0.0338	incidence	0.1283	0.0206	none
I60-I69	-1	1955	0.05735	0.2033	0.0338	impact	0.3316	0.0395828	none
K55-K63	-1	1915	0.05691	0.2234	0.0224	incidence	0.132	0.0333377	none
K55-K63	-1	1915	0.05691	0.2234	0.0224	impact	0.3554	0.0401642	none
K55-K63	-1	1925	0.05691	0.2234	0.0224	incidence	0.111	0.0238663	none
K55-K63	-1	1925	0.05691	0.2234	0.0224	impact	0.3344	0.0327316	none
K55-K63	-1	1935	0.05691	0.2234	0.0224	incidence	0.03424	0.0198716	none
K55-K63	-1	1935	0.05691	0.2234	0.0224	impact	0.25764	0.0299439	none
K55-K63	-1	1945	0.05691	0.2234	0.0224	incidence	0.01546	0.0160844	none
K55-K63	-1	1945	0.05691	0.2234	0.0224	impact	0.23886	0.0275766	none
K55-K63	-1	1955	0.05691	0.2234	0.0224	incidence	-0.0067	0.00974	none
K55-K63	-1	1955	0.05691	0.2234	0.0224	impact	0.2167	0.024426	none
J40-J47	-1	1915	0.05525	0.238	0.0465	incidence	0.061	0.0547526	none
J40-J47	-1	1915	0.05525	0.238	0.0465	impact	0.299	0.0718338	none
J40-J47	-1	1925	0.05525	0.238	0.0465	incidence	0.236	0.0414315	none
J40-J47	-1	1925	0.05525	0.238	0.0465	impact	0.474	0.0622802	none
J40-J47	-1	1935	0.05525	0.238	0.0465	incidence	0.37465	0.0372392	none
J40-J47	-1	1935	0.05525	0.238	0.0465	impact	0.61265	0.0595736	none
J40-J47	-1	1945	0.05525	0.238	0.0465	incidence	0.32565	0.0324065	none
J40-J47	-1	1945	0.05525	0.238	0.0465	impact	0.56365	0.0566783	none
J40-J47	-1	1955	0.05525	0.238	0.0465	incidence	0.2317	0.02062	none
J40-J47	-1	1955	0.05525	0.238	0.0465	impact	0.4697	0.0508668	none
I20-I25	-1	1915	0.05419	0.2639	0.0342	incidence	0.283	0.0344907	none
I20-I25	-1	1915	0.05419	0.2639	0.0342	impact	0.5469	0.0485721	none
I20-I25	-1	1925	0.05419	0.2639	0.0342	incidence	0.437	0.0263137	none
I20-I25	-1	1925	0.05419	0.2639	0.0342	impact	0.7009	0.0431515	none
I20-I25	-1	1935	0.05419	0.2639	0.0342	incidence	0.49165	0.0226153	none
I20-I25	-1	1935	0.05419	0.2639	0.0342	impact	0.75555	0.0410011	none
I20-I25	-1	1945	0.05419	0.2639	0.0342	incidence	0.52295	0.0190159	none
I20-I25	-1	1945	0.05419	0.2639	0.0342	impact	0.78685	0.0391311	none
I20-I25	-1	1955	0.05419	0.2639	0.0342	incidence	0.3884	0.01194	none
I20-I25	-1	1955	0.05419	0.2639	0.0342	impact	0.6523	0.0362244	none
N30-N39	-1	1915	0.05382	-0.2148	0.0395	incidence	-0.27757	0.0388252	none
N30-N39	-1	1915	0.05382	-0.2148	0.0395	impact	-0.49237	0.0553864	none
N30-N39	-1	1925	0.05382	-0.2148	0.0395	incidence	-0.0859	0.0328536	none
N30-N39	-1	1925	0.05382	-0.2148	0.0395	impact	-0.3007	0.0513771	none
N30-N39	-1	1935	0.05382	-0.2148	0.0395	incidence	0.0024	0.0292	none
N30-N39	-1	1935	0.05382	-0.2148	0.0395	impact	-0.2124	0.0491212	none
N30-N39	-1	1945	0.05382	-0.2148	0.0395	incidence	0.0832	0.0242055	none
N30-N39	-1	1945	0.05382	-0.2148	0.0395	impact	-0.1316	0.0463266	none
N30-N39	-1	1955	0.05382	-0.2148	0.0395	incidence	0.0762	0.01474	none
N30-N39	-1	1955	0.05382	-0.2148	0.0395	impact	-0.1386	0.0421606	none
K20-K31	-1	1915	0.05296	0.1335	0.0491	incidence	0.30913	0.0400451	none
K20-K31	-1	1915	0.05296	0.1335	0.0491	impact	0.44263	0.0633595	none
K20-K31	-1	1925	0.05296	0.1335	0.0491	incidence	0.3116	0.0262528	none
K20-K31	-1	1925	0.05296	0.1335	0.0491	impact	0.4451	0.0556778	none
K20-K31	-1	1935	0.05296	0.1335	0.0491	incidence	0.3308	0.0212417	none
K20-K31	-1	1935	0.05296	0.1335	0.0491	impact	0.4643	0.0534978	none
K20-K31	-1	1945	0.05296	0.1335	0.0491	incidence	0.3963	0.016866	none
K20-K31	-1	1945	0.05296	0.1335	0.0491	impact	0.5298	0.051916	none
K20-K31	-1	1955	0.05296	0.1335	0.0491	incidence	0.304	0.01011	none
K20-K31	-1	1955	0.05296	0.1335	0.0491	impact	0.4375	0.0501301	none
J20-J22	-1	1915	0.05013	-0.1073	0.0242	incidence	-0.22614	0.0505015	none
J20-J22	-1	1915	0.05013	-0.1073	0.0242	impact	-0.33344	0.0560004	none
J20-J22	-1	1925	0.05013	-0.1073	0.0242	incidence	-0.0604	0.0447214	none
J20-J22	-1	1925	0.05013	-0.1073	0.0242	impact	-0.1677	0.0508492	none
J20-J22	-1	1935	0.05013	-0.1073	0.0242	incidence	0.0052	0.0408589	none
J20-J22	-1	1935	0.05013	-0.1073	0.0242	impact	-0.1021	0.0474878	none
J20-J22	-1	1945	0.05013	-0.1073	0.0242	incidence	-0.0634	0.0349298	none
J20-J22	-1	1945	0.05013	-0.1073	0.0242	impact	-0.1707	0.0424939	none
J20-J22	-1	1955	0.05013	-0.1073	0.0242	incidence	-0.1954	0.02179	none
J20-J22	-1	1955	0.05013	-0.1073	0.0242	impact	-0.3027	0.0325645	none
S70-S79	-1	1915	0.03858	-0.0199	0.0211	incidence	0.05001	0.063028	none
S70-S79	-1	1915	0.03858	-0.0199	0.0211	impact	0.03011	0.0664661	none
S70-S79	-1	1925	0.03858	-0.0199	0.0211	incidence	0.2069	0.0602536	none
S70-S79	-1	1925	0.03858	-0.0199	0.0211	impact	0.187	0.0638413	none
S70-S79	-1	1935	0.03858	-0.0199	0.0211	incidence	0.2531	0.0575835	none
S70-S79	-1	1935	0.03858	-0.0199	0.0211	impact	0.2332	0.0613276	none
S70-S79	-1	1945	0.03858	-0.0199	0.0211	incidence	0.1413	0.0516831	none
S70-S79	-1	1945	0.03858	-0.0199	0.0211	impact	0.1214	0.0558243	none
S70-S79	-1	1955	0.03858	-0.0199	0.0211	incidence	0.0546	0.03333	none
S70-S79	-1	1955	0.03858	-0.0199	0.0211	impact	0.0347	0.0394474	none
A30-A49	-1	1915	0.03224	0.0633	0.1027	incidence	-0.5186	0.0777284	none
A30-A49	-1	1915	0.03224	0.0633	0.1027	impact	-0.4553	0.128798	none
A30-A49	-1	1925	0.03224	0.0633	0.1027	incidence	-0.4419	0.0652694	none
A30-A49	-1	1925	0.03224	0.0633	0.1027	impact	-0.3786	0.121686	none
A30-A49	-1	1935	0.03224	0.0633	0.1027	incidence	-0.3852	0.0589211	none
A30-A49	-1	1935	0.03224	0.0633	0.1027	impact	-0.3219	0.118402	none
A30-A49	-1	1945	0.03224	0.0633	0.1027	incidence	-0.4369	0.0506172	none
A30-A49	-1	1945	0.03224	0.0633	0.1027	impact	-0.3736	0.114496	none
A30-A49	-1	1955	0.03224	0.0633	0.1027	incidence	-0.4306	0.0319	none
A30-A49	-1	1955	0.03224	0.0633	0.1027	impact	-0.3673	0.10754	none
T80-T88	-1	1915	0.03223	0.1835	0.0631	incidence	-0.0659	0.0573247	none
T80-T88	-1	1915	0.03223	0.1835	0.0631	impact	0.1176	0.085251	none
T80-T88	-1	1925	0.03223	0.1835	0.0631	incidence	-0.039	0.039423	none
T80-T88	-1	1925	0.03223	0.1835	0.0631	impact	0.1445	0.0744028	none
T80-T88	-1	1935	0.03223	0.1835	0.0631	incidence	0.0098	0.0329196	none
T80-T88	-1	1935	0.03223	0.1835	0.0631	impact	0.1933	0.071171	none
T80-T88	-1	1945	0.03223	0.1835	0.0631	incidence	0.0174	0.0269433	none
T80-T88	-1	1945	0.03223	0.1835	0.0631	impact	0.2009	0.0686116	none
T80-T88	-1	1955	0.03223	0.1835	0.0631	incidence	-0.0975	0.0165	none
T80-T88	-1	1955	0.03223	0.1835	0.0631	impact	0.086	0.0652216	none
N17-N19	-1	1915	0.03099	0.2032	0.0578	incidence	-0.3314	0.0766572	none
N17-N19	-1	1915	0.03099	0.2032	0.0578	impact	-0.1282	0.0960061	none
N17-N19	-1	1925	0.03099	0.2032	0.0578	incidence	-0.0903	0.0665115	none
N17-N19	-1	1925	0.03099	0.2032	0.0578	impact	0.1129	0.0881171	none
N17-N19	-1	1935	0.03099	0.2032	0.0578	incidence	0.1154	0.0615033	none
N17-N19	-1	1935	0.03099	0.2032	0.0578	impact	0.3186	0.0844008	none
N17-N19	-1	1945	0.03099	0.2032	0.0578	incidence	0.0823	0.0541084	none
N17-N19	-1	1945	0.03099	0.2032	0.0578	impact	0.2855	0.0791742	none
N17-N19	-1	1955	0.03099	0.2032	0.0578	incidence	0.1126	0.0346	none
N17-N19	-1	1955	0.03099	0.2032	0.0578	impact	0.3158	0.0673647	none
I80-I89	-1	1915	0.02834	0.2381	0.0471	incidence	0.25092	0.0637326	none
I80-I89	-1	1915	0.02834	0.2381	0.0471	impact	0.48902	0.079248	none
I80-I89	-1	1925	0.02834	0.2381	0.0471	incidence	0.1729	0.0401005	none
I80-I89	-1	1925	0.02834	0.2381	0.0471	impact	0.411	0.0618584	none
I80-I89	-1	1935	0.02834	0.2381	0.0471	incidence	0.1818	0.0299803	none
I80-I89	-1	1935	0.02834	0.2381	0.0471	impact	0.4199	0.0558322	none
I80-I89	-1	1945	0.02834	0.2381	0.0471	incidence	0.2675	0.0221283	none
I80-I89	-1	1945	0.02834	0.2381	0.0471	impact	0.5056	0.0520391	none
I80-I89	-1	1955	0.02834	0.2381	0.0471	incidence	0.2474	0.01273	none
I80-I89	-1	1955	0.02834	0.2381	0.0471	impact	0.4855	0.04879	none
K90-K93	-1	1915	0.02617	0.1852	0.0703	incidence	0.0801	0.06406	none
K90-K93	-1	1915	0.02617	0.1852	0.0703	impact	0.2653	0.0951093	none
K90-K93	-1	1925	0.02617	0.1852	0.0703	incidence	0.1164	0.0508379	none
K90-K93	-1	1925	0.02617	0.1852	0.0703	impact	0.3016	0.0867559	none
K90-K93	-1	1935	0.02617	0.1852	0.0703	incidence	0.0173	0.0434309	none
K90-K93	-1	1935	0.02617	0.1852	0.0703	impact	0.2025	0.0826337	none
K90-K93	-1	1945	0.02617	0.1852	0.0703	incidence	-0.0215	0.0351204	none
K90-K93	-1	1945	0.02617	0.1852	0.0703	impact	0.1637	0.0785845	none
K90-K93	-1	1955	0.02617	0.1852	0.0703	incidence	-0.0991	0.0212	none
K90-K93	-1	1955	0.02617	0.1852	0.0703	impact	0.0861	0.073427	none
I70-I79	-1	1915	0.02608	0.091	0.0388	incidence	0.15853	0.0688676	none
I70-I79	-1	1915	0.02608	0.091	0.0388	impact	0.24953	0.0790454	none
I70-I79	-1	1925	0.02608	0.091	0.0388	incidence	0.3895	0.0543869	none
I70-I79	-1	1925	0.02608	0.091	0.0388	impact	0.4805	0.0668085	none
I70-I79	-1	1935	0.02608	0.091	0.0388	incidence	0.5012	0.0489908	none
I70-I79	-1	1935	0.02608	0.091	0.0388	impact	0.5922	0.0624943	none
I70-I79	-1	1945	0.02608	0.091	0.0388	incidence	0.4928	0.0428924	none
I70-I79	-1	1945	0.02608	0.091	0.0388	impact	0.5838	0.0578377	none
I70-I79	-1	1955	0.02608	0.091	0.0388	incidence	0.46	0.02752	none
I70-I79	-1	1955	0.02608	0.091	0.0388	impact	0.551	0.0475688	none
K50-K52	-1	1915	0.02464	0.1161	0.0314	incidence	0.15185	0.0606238	none
K50-K52	-1	1915	0.02464	0.1161	0.0314	impact	0.26795	0.0682731	none
K50-K52	-1	1925	0.02464	0.1161	0.0314	incidence	0.2981	0.0457739	none
K50-K52	-1	1925	0.02464	0.1161	0.0314	impact	0.4142	0.0555086	none
K50-K52	-1	1935	0.02464	0.1161	0.0314	incidence	0.3709	0.0382196	none
K50-K52	-1	1935	0.02464	0.1161	0.0314	impact	0.487	0.0494641	none
K50-K52	-1	1945	0.02464	0.1161	0.0314	incidence	0.3769	0.0301456	none
K50-K52	-1	1945	0.02464	0.1161	0.0314	impact	0.493	0.0435283	none
K50-K52	-1	1955	0.02464	0.1161	0.0314	incidence	0.3444	0.01784	none
K50-K52	-1	1955	0.02464	0.1161	0.0314	impact	0.4605	0.0361141	none
S00-S09	-1	1915	0.02432	0.0155	0.0484	incidence	-0.1914	0.0546484	none
S00-S09	-1	1915	0.02432	0.0155	0.0484	impact	-0.1759	0.0730001	none
S00-S09	-1	1925	0.02432	0.0155	0.0484	incidence	-0.1319	0.0463893	none
S00-S09	-1	1925	0.02432	0.0155	0.0484	impact	-0.1164	0.0670413	none
S00-S09	-1	1935	0.02432	0.0155	0.0484	incidence	0.035	0.0402548	none
S00-S09	-1	1935	0.02432	0.0155	0.0484	impact	0.0505	0.0629524	none
S00-S09	-1	1945	0.02432	0.0155	0.0484	incidence	0.2775	0.0316891	none
S00-S09	-1	1945	0.02432	0.0155	0.0484	impact	0.293	0.0578512	none
S00-S09	-1	1955	0.02432	0.0155	0.0484	incidence	0.2837	0.0184	none
S00-S09	-1	1955	0.02432	0.0155	0.0484	impact	0.2992	0.0517795	none
C50-C50	-1	1915	0.02331	1.1606	0.0688	incidence	0.28644	0.0902422	none
C50-C50	-1	1915	0.02331	1.1606	0.0688	impact	1.44704	0.113477	none
C50-C50	-1	1925	0.02331	1.1606	0.0688	incidence	0.2329	0.0550818	none
C50-C50	-1	1925	0.02331	1.1606	0.0688	impact	1.3935	0.0881331	none
C50-C50	-1	1935	0.02331	1.1606	0.0688	incidence	0.1266	0.0425737	none
C50-C50	-1	1935	0.02331	1.1606	0.0688	impact	1.2872	0.0809071	none
C50-C50	-1	1945	0.02331	1.1606	0.0688	incidence	0.1857	0.033018	none
C50-C50	-1	1945	0.02331	1.1606	0.0688	impact	1.3463	0.0763127	none
C50-C50	-1	1955	0.02331	1.1606	0.0688	incidence	0.2174	0.01983	none
C50-C50	-1	1955	0.02331	1.1606	0.0688	impact	1.378	0.0716008	none
C60-C63	-1	1915	0.01328	0.6983	0.0669	incidence	0.2049	0.107842	none
C60-C63	-1	1915	0.01328	0.6983	0.0669	impact	0.9032	0.126907	none
C60-C63	-1	1925	0.01328	0.6983	0.0669	incidence	0.3433	0.0816589	none
C60-C63	-1	1925	0.01328	0.6983	0.0669	impact	1.0416	0.105564	none
C60-C63	-1	1935	0.01328	0.6983	0.0669	incidence	0.108	0.074023	none
C60-C63	-1	1935	0.01328	0.6983	0.0669	impact	0.8063	0.0997748	none
C60-C63	-1	1945	0.01328	0.6983	0.0669	incidence	-0.0828	0.0672836	none
C60-C63	-1	1945	0.01328	0.6983	0.0669	impact	0.6155	0.0948825	none
C60-C63	-1	1955	0.01328	0.6983	0.0669	incidence	-0.0995	0.0448	none
C60-C63	-1	1955	0.01328	0.6983	0.0669	impact	0.5988	0.0805149	none
G30-G32	-1	1915	0.00282	0.0375	0.1439	incidence	0.02977	0.241277	none
G30-G32	-1	1915	0.00282	0.0375	0.1439	impact	0.06727	0.28093	none
G30-G32	-1	1925	0.00282	0.0375	0.1439	incidence	0.2979	0.226802	none
G30-G32	-1	1925	0.00282	0.0375	0.1439	impact	NA	NA	none
G30-G32	-1	1935	0.00282	0.0375	0.1439	incidence	0.54149	0.214359	none
G30-G32	-1	1935	0.00282	0.0375	0.1439	impact	NA	NA	none
G30-G32	-1	1945	0.00282	0.0375	0.1439	incidence	0.42091	0.187261	none
G30-G32	-1	1945	0.00282	0.0375	0.1439	impact	0.45841	0.236165	none
G30-G32	-1	1955	0.00282	0.0375	0.1439	incidence	0.1798	0.11813	none
G30-G32	-1	1955	0.00282	0.0375	0.1439	impact	0.2173	0.186177	none
ACT-DTH	1	1915	NA	NA	NA	incidence	-0.059	0.0272356	sex
ACT-DTH	1	1915	NA	NA	NA	impact	-0.059	0.0272356	sex
ACT-DTH	1	1925	NA	NA	NA	incidence	0.109	0.0243347	sex
ACT-DTH	1	1925	NA	NA	NA	impact	0.109	0.0243347	sex
ACT-DTH	1	1935	NA	NA	NA	incidence	0.274	0.0227167	sex
ACT-DTH	1	1935	NA	NA	NA	impact	0.274	0.0227167	sex
ACT-DTH	1	1945	NA	NA	NA	incidence	0.358	0.0201534	sex
ACT-DTH	1	1945	NA	NA	NA	impact	0.358	0.0201534	sex
ACT-DTH	1	1955	NA	NA	NA	incidence	0.339	0.013	sex
ACT-DTH	1	1955	NA	NA	NA	impact	0.339	0.013	sex
ACT-DTH	2	1915	NA	NA	NA	incidence	-0.076	0.029638	sex
ACT-DTH	2	1915	NA	NA	NA	impact	-0.076	0.029638	sex
ACT-DTH	2	1925	NA	NA	NA	incidence	0.13	0.0283593	sex
ACT-DTH	2	1925	NA	NA	NA	impact	0.13	0.0283593	sex
ACT-DTH	2	1935	NA	NA	NA	incidence	0.272	0.0269564	sex
ACT-DTH	2	1935	NA	NA	NA	impact	0.272	0.0269564	sex
ACT-DTH	2	1945	NA	NA	NA	incidence	0.273	0.024123	sex
ACT-DTH	2	1945	NA	NA	NA	impact	0.273	0.024123	sex
ACT-DTH	2	1955	NA	NA	NA	incidence	0.242	0.0156	sex
ACT-DTH	2	1955	NA	NA	NA	impact	0.242	0.0156	sex
EST-DTH	1	1915	1.42534	0.191293	0.0535119	incidence	0.0326979	0.0161028	sex
EST-DTH	1	1915	1.42534	0.191293	0.0535119	impact	0.22361	0.0196777	sex
EST-DTH	1	1925	1.42534	0.191293	0.0535119	incidence	0.118783	0.0118035	sex
EST-DTH	1	1925	1.42534	0.191293	0.0535119	impact	0.310076	0.0163492	sex
EST-DTH	1	1935	1.42534	0.191293	0.0535119	incidence	0.18644	0.010465	sex
EST-DTH	1	1935	1.42534	0.191293	0.0535119	impact	0.377733	0.0154107	sex
EST-DTH	1	1945	1.42534	0.191293	0.0535119	incidence	0.212334	0.0090729	sex
EST-DTH	1	1945	1.42534	0.191293	0.0535119	impact	0.403627	0.0145014	sex
EST-DTH	1	1955	1.42534	0.191293	0.0535119	incidence	0.163773	0.00579663	sex
EST-DTH	1	1955	1.42534	0.191293	0.0535119	impact	0.355066	0.0127112	sex
EST-DTH	2	1915	1.34705	0.182272	0.048171	incidence	0.00114746	0.0147216	sex
EST-DTH	2	1915	1.34705	0.182272	0.048171	impact	0.18342	0.0179618	sex
EST-DTH	2	1925	1.34705	0.182272	0.048171	incidence	0.119865	0.0118283	sex
EST-DTH	2	1925	1.34705	0.182272	0.048171	impact	0.302138	0.0156783	sex
EST-DTH	2	1935	1.34705	0.182272	0.048171	incidence	0.15591	0.0106211	sex
EST-DTH	2	1935	1.34705	0.182272	0.048171	impact	0.338182	0.0147888	sex
EST-DTH	2	1945	1.34705	0.182272	0.048171	incidence	0.134441	0.00913484	sex
EST-DTH	2	1945	1.34705	0.182272	0.048171	impact	0.316714	0.0137603	sex
EST-DTH	2	1955	1.34705	0.182272	0.048171	incidence	0.0741549	0.00576279	sex
EST-DTH	2	1955	1.34705	0.182272	0.048171	impact	0.256427	0.0117945	sex
J09-J18	1	1915	0.101	0.1144	0.0555	incidence	-0.1097	0.0617778	sex
J09-J18	1	1915	0.101	0.1144	0.0555	impact	0.0047	0.0830467	sex
J09-J18	1	1925	0.101	0.1144	0.0555	incidence	-0.12721	0.0539179	sex
J09-J18	1	1925	0.101	0.1144	0.0555	impact	-0.01281	0.0773782	sex
J09-J18	1	1935	0.101	0.1144	0.0555	incidence	-0.10449	0.0497579	sex
J09-J18	1	1935	0.101	0.1144	0.0555	impact	0.00991	0.0745393	sex
J09-J18	1	1945	0.101	0.1144	0.0555	incidence	-0.09908	0.043546	sex
J09-J18	1	1945	0.101	0.1144	0.0555	impact	0.01532	0.0705443	sex
J09-J18	1	1955	0.101	0.1144	0.0555	incidence	-0.15792	0.0277	sex
J09-J18	1	1955	0.101	0.1144	0.0555	impact	-0.04352	0.0620285	sex
J09-J18	2	1915	0.0886	0.1945	0.032	incidence	-0.2518	0.0613374	sex
J09-J18	2	1915	0.0886	0.1945	0.032	impact	-0.0573	0.0691829	sex
J09-J18	2	1925	0.0886	0.1945	0.032	incidence	-0.15187	0.0560286	sex
J09-J18	2	1925	0.0886	0.1945	0.032	impact	0.04263	0.0645229	sex
J09-J18	2	1935	0.0886	0.1945	0.032	incidence	-0.14063	0.05189	sex
J09-J18	2	1935	0.0886	0.1945	0.032	impact	0.05387	0.0609637	sex
J09-J18	2	1945	0.0886	0.1945	0.032	incidence	-0.27624	0.0448065	sex
J09-J18	2	1945	0.0886	0.1945	0.032	impact	-0.08174	0.0550601	sex
J09-J18	2	1955	0.0886	0.1945	0.032	incidence	-0.27376	0.0281	sex
J09-J18	2	1955	0.0886	0.1945	0.032	impact	-0.07926	0.0425865	sex
R00-R09	1	1915	0.0909	0.2189	0.0504	incidence	-0.0228	0.0519955	sex
R00-R09	1	1915	0.0909	0.2189	0.0504	impact	0.1961	0.0724133	sex
R00-R09	1	1925	0.0909	0.2189	0.0504	incidence	0.08933	0.0328746	sex
R00-R09	1	1925	0.0909	0.2189	0.0504	impact	0.30823	0.0601739	sex
R00-R09	1	1935	0.0909	0.2189	0.0504	incidence	0.22697	0.0263782	sex
R00-R09	1	1935	0.0909	0.2189	0.0504	impact	0.44587	0.0568856	sex
R00-R09	1	1945	0.0909	0.2189	0.0504	incidence	0.28377	0.020601	sex
R00-R09	1	1945	0.0909	0.2189	0.0504	impact	0.50267	0.0544478	sex
R00-R09	1	1955	0.0909	0.2189	0.0504	incidence	0.19423	0.0122	sex
R00-R09	1	1955	0.0909	0.2189	0.0504	impact	0.41313	0.0518556	sex
R00-R09	2	1915	0.0782	0.2416	0.0473	incidence	-0.057	0.0430015	sex
R00-R09	2	1915	0.0782	0.2416	0.0473	impact	0.1846	0.0639251	sex
R00-R09	2	1925	0.0782	0.2416	0.0473	incidence	0.07366	0.0321629	sex
R00-R09	2	1925	0.0782	0.2416	0.0473	impact	0.31526	0.0571991	sex
R00-R09	2	1935	0.0782	0.2416	0.0473	incidence	0.17524	0.0267088	sex
R00-R09	2	1935	0.0782	0.2416	0.0473	impact	0.41684	0.0543199	sex
R00-R09	2	1945	0.0782	0.2416	0.0473	incidence	0.2264	0.0210419	sex
R00-R09	2	1945	0.0782	0.2416	0.0473	impact	0.468	0.0517692	sex
R00-R09	2	1955	0.0782	0.2416	0.0473	incidence	0.0886	0.0124	sex
R00-R09	2	1955	0.0782	0.2416	0.0473	impact	0.3302	0.0488984	sex
C30-C39	1	1915	0.0942	0.213	0.0389	incidence	-0.0538	0.104118	sex
C30-C39	1	1915	0.0942	0.213	0.0389	impact	0.1592	0.111147	sex
C30-C39	1	1925	0.0942	0.213	0.0389	incidence	0.18086	0.0711866	sex
C30-C39	1	1925	0.0942	0.213	0.0389	impact	0.39386	0.0811218	sex
C30-C39	1	1935	0.0942	0.213	0.0389	incidence	0.35554	0.064397	sex
C30-C39	1	1935	0.0942	0.213	0.0389	impact	0.56854	0.0752342	sex
C30-C39	1	1945	0.0942	0.213	0.0389	incidence	0.46193	0.0582404	sex
C30-C39	1	1945	0.0942	0.213	0.0389	impact	0.67493	0.0700368	sex
C30-C39	1	1955	0.0942	0.213	0.0389	incidence	0.60807	0.0385	sex
C30-C39	1	1955	0.0942	0.213	0.0389	impact	0.82107	0.0547308	sex
C30-C39	2	1915	0.0756	0.2028	0.0706	incidence	-0.4167	0.109761	sex
C30-C39	2	1915	0.0756	0.2028	0.0706	impact	-0.2139	0.130506	sex
C30-C39	2	1925	0.0756	0.2028	0.0706	incidence	0.02981	0.0762192	sex
C30-C39	2	1925	0.0756	0.2028	0.0706	impact	0.23261	0.103893	sex
C30-C39	2	1935	0.0756	0.2028	0.0706	incidence	0.17359	0.0687212	sex
C30-C39	2	1935	0.0756	0.2028	0.0706	impact	0.37639	0.098524	sex
C30-C39	2	1945	0.0756	0.2028	0.0706	incidence	0.24838	0.0615332	sex
C30-C39	2	1945	0.0756	0.2028	0.0706	impact	0.45118	0.093652	sex
C30-C39	2	1955	0.0756	0.2028	0.0706	incidence	0.29862	0.0403	sex
C30-C39	2	1955	0.0756	0.2028	0.0706	impact	0.50142	0.0812924	sex
R10-R19	1	1915	0.0746	0.103	0.0465	incidence	0.2061	0.0641077	sex
R10-R19	1	1915	0.0746	0.103	0.0465	impact	0.3091	0.0791963	sex
R10-R19	1	1925	0.0746	0.103	0.0465	incidence	0.16362	0.0416984	sex
R10-R19	1	1925	0.0746	0.103	0.0465	impact	0.26662	0.0624581	sex
R10-R19	1	1935	0.0746	0.103	0.0465	incidence	0.18888	0.0334845	sex
R10-R19	1	1935	0.0746	0.103	0.0465	impact	0.29188	0.0573015	sex
R10-R19	1	1945	0.0746	0.103	0.0465	incidence	0.17844	0.0263002	sex
R10-R19	1	1945	0.0746	0.103	0.0465	impact	0.28144	0.0534224	sex
R10-R19	1	1955	0.0746	0.103	0.0465	incidence	0.09856	0.0157	sex
R10-R19	1	1955	0.0746	0.103	0.0465	impact	0.20156	0.0490789	sex
R10-R19	2	1915	0.09	0.1253	0.05	incidence	0.1598	0.0467954	sex
R10-R19	2	1915	0.09	0.1253	0.05	impact	0.2851	0.0684822	sex
R10-R19	2	1925	0.09	0.1253	0.05	incidence	0.1815	0.0343286	sex
R10-R19	2	1925	0.09	0.1253	0.05	impact	0.3068	0.0606502	sex
R10-R19	2	1935	0.09	0.1253	0.05	incidence	0.1651	0.0278772	sex
R10-R19	2	1935	0.09	0.1253	0.05	impact	0.2904	0.0572463	sex
R10-R19	2	1945	0.09	0.1253	0.05	incidence	0.11918	0.0215641	sex
R10-R19	2	1945	0.09	0.1253	0.05	impact	0.24448	0.0544519	sex
R10-R19	2	1955	0.09	0.1253	0.05	incidence	0.04182	0.0126	sex
R10-R19	2	1955	0.09	0.1253	0.05	impact	0.16712	0.0515632	sex
R50-R69	1	1915	0.0829	0.0742	0.0334	incidence	0.0601	0.05286	sex
R50-R69	1	1915	0.0829	0.0742	0.0334	impact	0.1343	0.0625279	sex
R50-R69	1	1925	0.0829	0.0742	0.0334	incidence	0.15465	0.0424279	sex
R50-R69	1	1925	0.0829	0.0742	0.0334	impact	0.22885	0.0539971	sex
R50-R69	1	1935	0.0829	0.0742	0.0334	incidence	0.19415	0.0374219	sex
R50-R69	1	1935	0.0829	0.0742	0.0334	impact	0.26835	0.0501593	sex
R50-R69	1	1945	0.0829	0.0742	0.0334	incidence	0.19373	0.0310221	sex
R50-R69	1	1945	0.0829	0.0742	0.0334	impact	0.26793	0.0455843	sex
R50-R69	1	1955	0.0829	0.0742	0.0334	incidence	0.09327	0.0189	sex
R50-R69	1	1955	0.0829	0.0742	0.0334	impact	0.16747	0.0383767	sex
R50-R69	2	1915	0.0748	-0.0166	0.0428	incidence	-0.0119	0.047281	sex
R50-R69	2	1915	0.0748	-0.0166	0.0428	impact	-0.0285	0.0637756	sex
R50-R69	2	1925	0.0748	-0.0166	0.0428	incidence	0.22479	0.0422456	sex
R50-R69	2	1925	0.0748	-0.0166	0.0428	impact	0.20819	0.0601376	sex
R50-R69	2	1935	0.0748	-0.0166	0.0428	incidence	0.198003	0.0381933	sex
R50-R69	2	1935	0.0748	-0.0166	0.0428	impact	0.181403	0.0573635	sex
R50-R69	2	1945	0.0748	-0.0166	0.0428	incidence	0.0608969	0.0314401	sex
R50-R69	2	1945	0.0748	-0.0166	0.0428	impact	0.0442969	0.0531067	sex
R50-R69	2	1955	0.0748	-0.0166	0.0428	incidence	-0.06099	0.0188	sex
R50-R69	2	1955	0.0748	-0.0166	0.0428	impact	-0.07759	0.046747	sex
C15-C26	1	1915	0.0913	0.366	0.0475	incidence	0.0876	0.0809457	sex
C15-C26	1	1915	0.0913	0.366	0.0475	impact	0.4536	0.0938533	sex
C15-C26	1	1925	0.0913	0.366	0.0475	incidence	0.17702	0.0581654	sex
C15-C26	1	1925	0.0913	0.366	0.0475	impact	0.54302	0.0750963	sex
C15-C26	1	1935	0.0913	0.366	0.0475	incidence	0.28948	0.0520312	sex
C15-C26	1	1935	0.0913	0.366	0.0475	impact	0.65548	0.0704521	sex
C15-C26	1	1945	0.0913	0.366	0.0475	incidence	0.35387	0.0460977	sex
C15-C26	1	1945	0.0913	0.366	0.0475	impact	0.71987	0.066191	sex
C15-C26	1	1955	0.0913	0.366	0.0475	incidence	0.33013	0.03	sex
C15-C26	1	1955	0.0913	0.366	0.0475	impact	0.69613	0.0561805	sex
C15-C26	2	1915	0.064	0.4284	0.0499	incidence	0.0923	0.0818675	sex
C15-C26	2	1915	0.064	0.4284	0.0499	impact	0.5207	0.0958764	sex
C15-C26	2	1925	0.064	0.4284	0.0499	incidence	0.21209	0.0689362	sex
C15-C26	2	1925	0.064	0.4284	0.0499	impact	0.64049	0.0851012	sex
C15-C26	2	1935	0.064	0.4284	0.0499	incidence	0.23351	0.0631373	sex
C15-C26	2	1935	0.064	0.4284	0.0499	impact	0.66191	0.0804756	sex
C15-C26	2	1945	0.064	0.4284	0.0499	incidence	0.29841	0.0557097	sex
C15-C26	2	1945	0.064	0.4284	0.0499	impact	0.72681	0.0747902	sex
C15-C26	2	1955	0.064	0.4284	0.0499	incidence	0.22859	0.0359	sex
C15-C26	2	1955	0.064	0.4284	0.0499	impact	0.65699	0.0614721	sex
I30-I52	1	1915	0.078	0.2884	0.0332	incidence	0.09	0.0538001	sex
I30-I52	1	1915	0.078	0.2884	0.0332	impact	0.3784	0.0632194	sex
I30-I52	1	1925	0.078	0.2884	0.0332	incidence	0.24098	0.0433341	sex
I30-I52	1	1925	0.078	0.2884	0.0332	impact	0.52938	0.0545901	sex
I30-I52	1	1935	0.078	0.2884	0.0332	incidence	0.34122	0.0390825	sex
I30-I52	1	1935	0.078	0.2884	0.0332	impact	0.62962	0.0512804	sex
I30-I52	1	1945	0.078	0.2884	0.0332	incidence	0.31449	0.0340196	sex
I30-I52	1	1945	0.078	0.2884	0.0332	impact	0.60289	0.0475349	sex
I30-I52	1	1955	0.078	0.2884	0.0332	incidence	0.19151	0.0217	sex
I30-I52	1	1955	0.078	0.2884	0.0332	impact	0.47991	0.0396627	sex
I30-I52	2	1915	0.0671	0.0783	0.0275	incidence	0.1342	0.0581406	sex
I30-I52	2	1915	0.0671	0.0783	0.0275	impact	0.2125	0.0643163	sex
I30-I52	2	1925	0.0671	0.0783	0.0275	incidence	0.30216	0.0534072	sex
I30-I52	2	1925	0.0671	0.0783	0.0275	impact	0.38046	0.0600715	sex
I30-I52	2	1935	0.0671	0.0783	0.0275	incidence	0.32624	0.050165	sex
I30-I52	2	1935	0.0671	0.0783	0.0275	impact	0.40454	0.0572082	sex
I30-I52	2	1945	0.0671	0.0783	0.0275	incidence	0.28752	0.0447111	sex
I30-I52	2	1945	0.0671	0.0783	0.0275	impact	0.36582	0.0524912	sex
I30-I52	2	1955	0.0671	0.0783	0.0275	incidence	0.14248	0.0288	sex
I30-I52	2	1955	0.0671	0.0783	0.0275	impact	0.22078	0.0398207	sex
C76-C80	1	1915	0.0626	0.2093	0.0866	incidence	0.0463	0.119448	sex
C76-C80	1	1915	0.0626	0.2093	0.0866	impact	0.2556	0.147537	sex
C76-C80	1	1925	0.0626	0.2093	0.0866	incidence	0.16267	0.0856715	sex
C76-C80	1	1925	0.0626	0.2093	0.0866	impact	0.37197	0.121816	sex
C76-C80	1	1935	0.0626	0.2093	0.0866	incidence	0.20203	0.0762476	sex
C76-C80	1	1935	0.0626	0.2093	0.0866	impact	0.41133	0.115383	sex
C76-C80	1	1945	0.0626	0.2093	0.0866	incidence	0.26424	0.067184	sex
C76-C80	1	1945	0.0626	0.2093	0.0866	impact	0.47354	0.109605	sex
C76-C80	1	1955	0.0626	0.2093	0.0866	incidence	0.35176	0.0435	sex
C76-C80	1	1955	0.0626	0.2093	0.0866	impact	0.56106	0.0969114	sex
C76-C80	2	1915	0.0679	0.5031	0.0541	incidence	0.0566	0.100839	sex
C76-C80	2	1915	0.0679	0.5031	0.0541	impact	0.5597	0.114435	sex
C76-C80	2	1925	0.0679	0.5031	0.0541	incidence	0.07494	0.0764809	sex
C76-C80	2	1925	0.0679	0.5031	0.0541	impact	0.57804	0.0936811	sex
C76-C80	2	1935	0.0679	0.5031	0.0541	incidence	0.20836	0.0669517	sex
C76-C80	2	1935	0.0679	0.5031	0.0541	impact	0.71146	0.0860775	sex
C76-C80	2	1945	0.0679	0.5031	0.0541	incidence	0.24605	0.0570832	sex
C76-C80	2	1945	0.0679	0.5031	0.0541	impact	0.74915	0.0786467	sex
C76-C80	2	1955	0.0679	0.5031	0.0541	incidence	0.21295	0.036	sex
C76-C80	2	1955	0.0679	0.5031	0.0541	impact	0.71605	0.0649832	sex
Z40-Z54	1	1915	0.0656	0.364	0.0574	incidence	-0.0204	0.0612396	sex
Z40-Z54	1	1915	0.0656	0.364	0.0574	impact	0.3436	0.0839348	sex
Z40-Z54	1	1925	0.0656	0.364	0.0574	incidence	0.0138	0.0385149	sex
Z40-Z54	1	1925	0.0656	0.364	0.0574	impact	0.3778	0.0691242	sex
Z40-Z54	1	1935	0.0656	0.364	0.0574	incidence	-0.0121	0.0319977	sex
Z40-Z54	1	1935	0.0656	0.364	0.0574	impact	0.3519	0.0657161	sex
Z40-Z54	1	1945	0.0656	0.364	0.0574	incidence	0.00148	0.0262855	sex
Z40-Z54	1	1945	0.0656	0.364	0.0574	impact	0.36548	0.0631323	sex
Z40-Z54	1	1955	0.0656	0.364	0.0574	incidence	-0.05008	0.0162	sex
Z40-Z54	1	1955	0.0656	0.364	0.0574	impact	0.31392	0.0596423	sex
Z40-Z54	2	1915	0.0583	0.2137	0.0266	incidence	0.2334	0.0543902	sex
Z40-Z54	2	1915	0.0583	0.2137	0.0266	impact	0.4471	0.0605463	sex
Z40-Z54	2	1925	0.0583	0.2137	0.0266	incidence	-0.00426	0.0385784	sex
Z40-Z54	2	1925	0.0583	0.2137	0.0266	impact	0.20944	0.0468599	sex
Z40-Z54	2	1935	0.0583	0.2137	0.0266	incidence	-0.04284	0.0317536	sex
Z40-Z54	2	1935	0.0583	0.2137	0.0266	impact	0.17086	0.0414228	sex
Z40-Z54	2	1945	0.0583	0.2137	0.0266	incidence	-0.05733	0.0250416	sex
Z40-Z54	2	1945	0.0583	0.2137	0.0266	impact	0.15637	0.0365327	sex
Z40-Z54	2	1955	0.0583	0.2137	0.0266	incidence	-0.07167	0.0148	sex
Z40-Z54	2	1955	0.0583	0.2137	0.0266	impact	0.14203	0.0304401	sex
I60-I69	1	1915	0.0534	0.2677	0.0509	incidence	0.1651	0.0666007	sex
I60-I69	1	1915	0.0534	0.2677	0.0509	impact	0.4328	0.083824	sex
I60-I69	1	1925	0.0534	0.2677	0.0509	incidence	0.26358	0.0543654	sex
I60-I69	1	1925	0.0534	0.2677	0.0509	impact	0.53128	0.0744742	sex
I60-I69	1	1935	0.0534	0.2677	0.0509	incidence	0.32482	0.0493474	sex
I60-I69	1	1935	0.0534	0.2677	0.0509	impact	0.59252	0.0708941	sex
I60-I69	1	1945	0.0534	0.2677	0.0509	incidence	0.31811	0.0429694	sex
I60-I69	1	1945	0.0534	0.2677	0.0509	impact	0.58581	0.0666122	sex
I60-I69	1	1955	0.0534	0.2677	0.0509	incidence	0.15489	0.0274	sex
I60-I69	1	1955	0.0534	0.2677	0.0509	impact	0.42259	0.0578063	sex
I60-I69	2	1915	0.0605	0.151	0.0368	incidence	0.0712	0.0657072	sex
I60-I69	2	1915	0.0605	0.151	0.0368	impact	0.2222	0.0753106	sex
I60-I69	2	1925	0.0605	0.151	0.0368	incidence	0.33121	0.0606209	sex
I60-I69	2	1925	0.0605	0.151	0.0368	impact	0.48221	0.0709164	sex
I60-I69	2	1935	0.0605	0.151	0.0368	incidence	0.34719	0.0567551	sex
I60-I69	2	1935	0.0605	0.151	0.0368	impact	0.49819	0.0676416	sex
I60-I69	2	1945	0.0605	0.151	0.0368	incidence	0.2721	0.0495549	sex
I60-I69	2	1945	0.0605	0.151	0.0368	impact	0.4231	0.0617246	sex
I60-I69	2	1955	0.0605	0.151	0.0368	incidence	0.0939	0.0312	sex
I60-I69	2	1955	0.0605	0.151	0.0368	impact	0.2449	0.048246	sex
K55-K63	1	1915	0.056	0.2964	0.0283	incidence	0.1428	0.0556424	sex
K55-K63	1	1915	0.056	0.2964	0.0283	impact	0.4392	0.0624257	sex
K55-K63	1	1925	0.056	0.2964	0.0283	incidence	0.09951	0.0356389	sex
K55-K63	1	1925	0.056	0.2964	0.0283	impact	0.39591	0.0455085	sex
K55-K63	1	1935	0.056	0.2964	0.0283	incidence	0.00349	0.0290388	sex
K55-K63	1	1935	0.056	0.2964	0.0283	impact	0.29989	0.040548	sex
K55-K63	1	1945	0.056	0.2964	0.0283	incidence	-0.01481	0.0234009	sex
K55-K63	1	1945	0.056	0.2964	0.0283	impact	0.28159	0.0367218	sex
K55-K63	1	1955	0.056	0.2964	0.0283	incidence	-0.00509	0.0142	sex
K55-K63	1	1955	0.056	0.2964	0.0283	impact	0.29131	0.0316628	sex
K55-K63	2	1915	0.0578	0.1624	0.0349	incidence	0.1333	0.0426169	sex
K55-K63	2	1915	0.0578	0.1624	0.0349	impact	0.2957	0.0550837	sex
K55-K63	2	1925	0.0578	0.1624	0.0349	incidence	0.12058	0.0321504	sex
K55-K63	2	1925	0.0578	0.1624	0.0349	impact	0.28298	0.0474517	sex
K55-K63	2	1935	0.0578	0.1624	0.0349	incidence	0.05862	0.0271708	sex
K55-K63	2	1935	0.0578	0.1624	0.0349	impact	0.22102	0.0442296	sex
K55-K63	2	1945	0.0578	0.1624	0.0349	incidence	0.04294	0.0221206	sex
K55-K63	2	1945	0.0578	0.1624	0.0349	impact	0.20534	0.0413198	sex
K55-K63	2	1955	0.0578	0.1624	0.0349	incidence	-0.00794	0.0134	sex
K55-K63	2	1955	0.0578	0.1624	0.0349	impact	0.15446	0.0373841	sex
J40-J47	1	1915	0.0502	0.2043	0.0751	incidence	0.2205	0.0855409	sex
J40-J47	1	1915	0.0502	0.2043	0.0751	impact	0.4248	0.11383	sex
J40-J47	1	1925	0.0502	0.2043	0.0751	incidence	0.30273	0.065068	sex
J40-J47	1	1925	0.0502	0.2043	0.0751	impact	0.50703	0.0993673	sex
J40-J47	1	1935	0.0502	0.2043	0.0751	incidence	0.43187	0.0591014	sex
J40-J47	1	1935	0.0502	0.2043	0.0751	impact	0.63617	0.0955666	sex
J40-J47	1	1945	0.0502	0.2043	0.0751	incidence	0.39794	0.052292	sex
J40-J47	1	1945	0.0502	0.2043	0.0751	impact	0.60224	0.0915121	sex
J40-J47	1	1955	0.0502	0.2043	0.0751	incidence	0.31406	0.0338	sex
J40-J47	1	1955	0.0502	0.2043	0.0751	impact	0.51836	0.0823556	sex
J40-J47	2	1915	0.0602	0.268	0.0353	incidence	-0.0041	0.0713981	sex
J40-J47	2	1915	0.0602	0.268	0.0353	impact	0.2639	0.0796479	sex
J40-J47	2	1925	0.0602	0.268	0.0353	incidence	0.19374	0.0541208	sex
J40-J47	2	1925	0.0602	0.268	0.0353	impact	0.46174	0.0646154	sex
J40-J47	2	1935	0.0602	0.268	0.0353	incidence	0.32766	0.048225	sex
J40-J47	2	1935	0.0602	0.268	0.0353	impact	0.59566	0.059764	sex
J40-J47	2	1945	0.0602	0.268	0.0353	incidence	0.26532	0.0414494	sex
J40-J47	2	1945	0.0602	0.268	0.0353	impact	0.53332	0.0544439	sex
J40-J47	2	1955	0.0602	0.268	0.0353	incidence	0.18468	0.0261	sex
J40-J47	2	1955	0.0602	0.268	0.0353	impact	0.45268	0.043901	sex
I20-I25	1	1915	0.06	0.3489	0.034	incidence	0.2305	0.0501462	sex
I20-I25	1	1915	0.06	0.3489	0.034	impact	0.5794	0.0605858	sex
I20-I25	1	1925	0.06	0.3489	0.034	incidence	0.41256	0.0333294	sex
I20-I25	1	1925	0.06	0.3489	0.034	impact	0.76146	0.0476114	sex
I20-I25	1	1935	0.06	0.3489	0.034	incidence	0.47224	0.0276053	sex
I20-I25	1	1935	0.06	0.3489	0.034	impact	0.82114	0.0437955	sex
I20-I25	1	1945	0.06	0.3489	0.034	incidence	0.49211	0.0227702	sex
I20-I25	1	1945	0.06	0.3489	0.034	impact	0.84101	0.0409204	sex
I20-I25	1	1955	0.06	0.3489	0.034	incidence	0.36289	0.0142	sex
I20-I25	1	1955	0.06	0.3489	0.034	impact	0.71179	0.0368462	sex
I20-I25	2	1915	0.0475	0.1668	0.049	incidence	0.2925	0.0528342	sex
I20-I25	2	1915	0.0475	0.1668	0.049	impact	0.4593	0.0720587	sex
I20-I25	2	1925	0.0475	0.1668	0.049	incidence	0.4541	0.0447464	sex
I20-I25	2	1925	0.0475	0.1668	0.049	impact	0.6209	0.0663569	sex
I20-I25	2	1935	0.0475	0.1668	0.049	incidence	0.5249	0.040294	sex
I20-I25	2	1935	0.0475	0.1668	0.049	impact	0.6917	0.0634398	sex
I20-I25	2	1945	0.0475	0.1668	0.049	incidence	0.58498	0.0347507	sex
I20-I25	2	1945	0.0475	0.1668	0.049	impact	0.75178	0.0600717	sex
I20-I25	2	1955	0.0475	0.1668	0.049	incidence	0.44502	0.022	sex
I20-I25	2	1955	0.0475	0.1668	0.049	impact	0.61182	0.0537122	sex
N30-N39	1	1915	0.0469	-0.2899	0.0369	incidence	-0.2618	0.06322	sex
N30-N39	1	1915	0.0469	-0.2899	0.0369	impact	-0.5517	0.073201	sex
N30-N39	1	1925	0.0469	-0.2899	0.0369	incidence	-0.07632	0.0509157	sex
N30-N39	1	1925	0.0469	-0.2899	0.0369	impact	-0.36622	0.062881	sex
N30-N39	1	1935	0.0469	-0.2899	0.0369	incidence	0.06462	0.0454757	sex
N30-N39	1	1935	0.0469	-0.2899	0.0369	impact	-0.22528	0.0585632	sex
N30-N39	1	1945	0.0469	-0.2899	0.0369	incidence	0.14991	0.0386999	sex
N30-N39	1	1945	0.0469	-0.2899	0.0369	impact	-0.13999	0.0534723	sex
N30-N39	1	1955	0.0469	-0.2899	0.0369	incidence	0.17109	0.0242	sex
N30-N39	1	1955	0.0469	-0.2899	0.0369	impact	-0.11881	0.0441277	sex
N30-N39	2	1915	0.06	-0.1589	0.0528	incidence	-0.2739	0.0500373	sex
N30-N39	2	1915	0.06	-0.1589	0.0528	impact	-0.4328	0.0727432	sex
N30-N39	2	1925	0.06	-0.1589	0.0528	incidence	-0.08617	0.0434681	sex
N30-N39	2	1925	0.06	-0.1589	0.0528	impact	-0.24507	0.0683909	sex
N30-N39	2	1935	0.06	-0.1589	0.0528	incidence	-0.05313	0.0385052	sex
N30-N39	2	1935	0.06	-0.1589	0.0528	impact	-0.21203	0.065349	sex
N30-N39	2	1945	0.06	-0.1589	0.0528	incidence	0.02599	0.0312405	sex
N30-N39	2	1945	0.06	-0.1589	0.0528	impact	-0.13291	0.0613499	sex
N30-N39	2	1955	0.06	-0.1589	0.0528	incidence	0.02101	0.0186	sex
N30-N39	2	1955	0.06	-0.1589	0.0528	impact	-0.13789	0.0559804	sex
K20-K31	1	1915	0.0595	0.1072	0.0529	incidence	0.3032	0.0637122	sex
K20-K31	1	1915	0.0595	0.1072	0.0529	impact	0.4104	0.082811	sex
K20-K31	1	1925	0.0595	0.1072	0.0529	incidence	0.31114	0.038451	sex
K20-K31	1	1925	0.0595	0.1072	0.0529	impact	0.41834	0.0653979	sex
K20-K31	1	1935	0.0595	0.1072	0.0529	incidence	0.35236	0.030705	sex
K20-K31	1	1935	0.0595	0.1072	0.0529	impact	0.45956	0.0611654	sex
K20-K31	1	1945	0.0595	0.1072	0.0529	incidence	0.44923	0.0243403	sex
K20-K31	1	1945	0.0595	0.1072	0.0529	impact	0.55643	0.0582311	sex
K20-K31	1	1955	0.0595	0.1072	0.0529	incidence	0.36777	0.0147	sex
K20-K31	1	1955	0.0595	0.1072	0.0529	impact	0.47497	0.0549045	sex
K20-K31	2	1915	0.0466	0.1561	0.074	incidence	0.3316	0.0521845	sex
K20-K31	2	1915	0.0466	0.1561	0.074	impact	0.4877	0.0905495	sex
K20-K31	2	1925	0.0466	0.1561	0.074	incidence	0.31704	0.035968	sex
K20-K31	2	1925	0.0466	0.1561	0.074	impact	0.47314	0.0822782	sex
K20-K31	2	1935	0.0466	0.1561	0.074	incidence	0.31066	0.0293471	sex
K20-K31	2	1935	0.0466	0.1561	0.074	impact	0.46676	0.0796068	sex
K20-K31	2	1945	0.0466	0.1561	0.074	incidence	0.34669	0.02328	sex
K20-K31	2	1945	0.0466	0.1561	0.074	impact	0.50279	0.0775755	sex
K20-K31	2	1955	0.0466	0.1561	0.074	incidence	0.24631	0.014	sex
K20-K31	2	1955	0.0466	0.1561	0.074	impact	0.40241	0.0753127	sex
J20-J22	1	1915	0.0529	-0.0947	0.0489	incidence	-0.1956	0.0751822	sex
J20-J22	1	1915	0.0529	-0.0947	0.0489	impact	-0.2903	0.089686	sex
J20-J22	1	1925	0.0529	-0.0947	0.0489	incidence	-0.03153	0.0640466	sex
J20-J22	1	1925	0.0529	-0.0947	0.0489	impact	-0.12623	0.0805803	sex
J20-J22	1	1935	0.0529	-0.0947	0.0489	incidence	0.03403	0.0584825	sex
J20-J22	1	1935	0.0529	-0.0947	0.0489	impact	-0.06067	0.0762326	sex
J20-J22	1	1945	0.0529	-0.0947	0.0489	incidence	-0.00971	0.0504765	sex
J20-J22	1	1945	0.0529	-0.0947	0.0489	impact	-0.10441	0.0702787	sex
J20-J22	1	1955	0.0529	-0.0947	0.0489	incidence	-0.14029	0.0318	sex
J20-J22	1	1955	0.0529	-0.0947	0.0489	impact	-0.23499	0.0583305	sex
J20-J22	2	1915	0.0481	-0.1198	0.0272	incidence	-0.2303	0.0691527	sex
J20-J22	2	1915	0.0481	-0.1198	0.0272	impact	-0.3501	0.0743098	sex
J20-J22	2	1925	0.0481	-0.1198	0.0272	incidence	-0.08025	0.062476	sex
J20-J22	2	1925	0.0481	-0.1198	0.0272	impact	-0.20005	0.0681402	sex
J20-J22	2	1935	0.0481	-0.1198	0.0272	incidence	-0.02545	0.0572189	sex
J20-J22	2	1935	0.0481	-0.1198	0.0272	impact	-0.14525	0.0633549	sex
J20-J22	2	1945	0.0481	-0.1198	0.0272	incidence	-0.12188	0.048572	sex
J20-J22	2	1945	0.0481	-0.1198	0.0272	impact	-0.24168	0.0556694	sex
J20-J22	2	1955	0.0481	-0.1198	0.0272	incidence	-0.24212	0.03	sex
J20-J22	2	1955	0.0481	-0.1198	0.0272	impact	-0.36192	0.0404949	sex
S70-S79	1	1915	0.0278	0.0925	0.0622	incidence	-0.0393	0.0998299	sex
S70-S79	1	1915	0.0278	0.0925	0.0622	impact	0.0532	0.117622	sex
S70-S79	1	1925	0.0278	0.0925	0.0622	incidence	0.11241	0.0908282	sex
S70-S79	1	1925	0.0278	0.0925	0.0622	impact	0.20491	0.110085	sex
S70-S79	1	1935	0.0278	0.0925	0.0622	incidence	0.20199	0.0845149	sex
S70-S79	1	1935	0.0278	0.0925	0.0622	impact	0.29449	0.104936	sex
S70-S79	1	1945	0.0278	0.0925	0.0622	incidence	0.20731	0.073498	sex
S70-S79	1	1945	0.0278	0.0925	0.0622	impact	0.29981	0.096285	sex
S70-S79	1	1955	0.0278	0.0925	0.0622	incidence	0.03569	0.0464	sex
S70-S79	1	1955	0.0278	0.0925	0.0622	impact	0.12819	0.0776003	sex
S70-S79	2	1915	0.0474	-0.0664	0.0213	incidence	0.0683	0.0850805	sex
S70-S79	2	1915	0.0474	-0.0664	0.0213	impact	0.0019	0.0877062	sex
S70-S79	2	1925	0.0474	-0.0664	0.0213	incidence	0.23515	0.0825245	sex
S70-S79	2	1925	0.0474	-0.0664	0.0213	impact	0.16875	0.085229	sex
S70-S79	2	1935	0.0474	-0.0664	0.0213	incidence	0.27575	0.0798519	sex
S70-S79	2	1935	0.0474	-0.0664	0.0213	impact	0.20935	0.0826439	sex
S70-S79	2	1945	0.0474	-0.0664	0.0213	incidence	0.09764	0.0730852	sex
S70-S79	2	1945	0.0474	-0.0664	0.0213	impact	0.03124	0.0761258	sex
S70-S79	2	1955	0.0474	-0.0664	0.0213	incidence	0.07036	0.0479	sex
S70-S79	2	1955	0.0474	-0.0664	0.0213	impact	0.00396	0.0524223	sex
A30-A49	1	1915	0.0318	0.02	0.1402	incidence	-0.5393	0.117001	sex
A30-A49	1	1915	0.0318	0.02	0.1402	impact	-0.5193	0.182607	sex
A30-A49	1	1925	0.0318	0.02	0.1402	incidence	-0.46406	0.0939598	sex
A30-A49	1	1925	0.0318	0.02	0.1402	impact	-0.44406	0.168773	sex
A30-A49	1	1935	0.0318	0.02	0.1402	incidence	-0.42934	0.0846835	sex
A30-A49	1	1935	0.0318	0.02	0.1402	impact	-0.40934	0.163791	sex
A30-A49	1	1945	0.0318	0.02	0.1402	incidence	-0.41551	0.0735196	sex
A30-A49	1	1945	0.0318	0.02	0.1402	impact	-0.39551	0.158307	sex
A30-A49	1	1955	0.0318	0.02	0.1402	incidence	-0.35449	0.0468	sex
A30-A49	1	1955	0.0318	0.02	0.1402	impact	-0.33449	0.147805	sex
A30-A49	2	1915	0.033	0.1166	0.097	incidence	-0.4889	0.105414	sex
A30-A49	2	1915	0.033	0.1166	0.097	impact	-0.3723	0.143252	sex
A30-A49	2	1925	0.033	0.1166	0.097	incidence	-0.41942	0.0909526	sex
A30-A49	2	1925	0.033	0.1166	0.097	impact	-0.30282	0.132971	sex
A30-A49	2	1935	0.033	0.1166	0.097	incidence	-0.33818	0.0822317	sex
A30-A49	2	1935	0.033	0.1166	0.097	impact	-0.22158	0.127165	sex
A30-A49	2	1945	0.033	0.1166	0.097	incidence	-0.46189	0.0700752	sex
A30-A49	2	1945	0.033	0.1166	0.097	impact	-0.34529	0.119664	sex
A30-A49	2	1955	0.033	0.1166	0.097	incidence	-0.49511	0.0438	sex
A30-A49	2	1955	0.033	0.1166	0.097	impact	-0.37851	0.10643	sex
T80-T88	1	1915	0.0365	0.1569	0.0961	incidence	-0.1183	0.0830399	sex
T80-T88	1	1915	0.0365	0.1569	0.0961	impact	0.0386	0.127007	sex
T80-T88	1	1925	0.0365	0.1569	0.0961	incidence	-0.07091	0.0556836	sex
T80-T88	1	1925	0.0365	0.1569	0.0961	impact	0.08599	0.111067	sex
T80-T88	1	1935	0.0365	0.1569	0.0961	incidence	0.01491	0.046868	sex
T80-T88	1	1935	0.0365	0.1569	0.0961	impact	0.17181	0.10692	sex
T80-T88	1	1945	0.0365	0.1569	0.0961	incidence	0.07947	0.0391372	sex
T80-T88	1	1945	0.0365	0.1569	0.0961	impact	0.23637	0.103764	sex
T80-T88	1	1955	0.0365	0.1569	0.0961	incidence	-0.06007	0.0244	sex
T80-T88	1	1955	0.0365	0.1569	0.0961	impact	0.09683	0.0991492	sex
T80-T88	2	1915	0.0286	0.2264	0.053	incidence	0.0327	0.0797198	sex
T80-T88	2	1915	0.0286	0.2264	0.053	impact	0.2591	0.09573	sex
T80-T88	2	1925	0.0286	0.2264	0.053	incidence	0.00919	0.0559786	sex
T80-T88	2	1925	0.0286	0.2264	0.053	impact	0.23559	0.0770883	sex
T80-T88	2	1935	0.0286	0.2264	0.053	incidence	0.00311	0.0464263	sex
T80-T88	2	1935	0.0286	0.2264	0.053	impact	0.22951	0.0704585	sex
T80-T88	2	1945	0.0286	0.2264	0.053	incidence	-0.05197	0.0373402	sex
T80-T88	2	1945	0.0286	0.2264	0.053	impact	0.17443	0.0648328	sex
T80-T88	2	1955	0.0286	0.2264	0.053	incidence	-0.12703	0.0225	sex
T80-T88	2	1955	0.0286	0.2264	0.053	impact	0.09937	0.0575782	sex
N17-N19	1	1915	0.0338	0.1446	0.0628	incidence	-0.2104	0.107694	sex
N17-N19	1	1915	0.0338	0.1446	0.0628	impact	-0.0658	0.124667	sex
N17-N19	1	1925	0.0338	0.1446	0.0628	incidence	-0.02535	0.0896688	sex
N17-N19	1	1925	0.0338	0.1446	0.0628	impact	0.11925	0.109473	sex
N17-N19	1	1935	0.0338	0.1446	0.0628	incidence	0.13495	0.0823156	sex
N17-N19	1	1935	0.0338	0.1446	0.0628	impact	0.27955	0.103536	sex
N17-N19	1	1945	0.0338	0.1446	0.0628	incidence	0.08463	0.0724177	sex
N17-N19	1	1945	0.0338	0.1446	0.0628	impact	0.22923	0.0958549	sex
N17-N19	1	1955	0.0338	0.1446	0.0628	incidence	0.17037	0.0464	sex
N17-N19	1	1955	0.0338	0.1446	0.0628	impact	0.31497	0.078082	sex
N17-N19	2	1915	0.0287	0.2572	0.0793	incidence	-0.3939	0.111188	sex
N17-N19	2	1915	0.0287	0.2572	0.0793	impact	-0.1367	0.13657	sex
N17-N19	2	1925	0.0287	0.2572	0.0793	incidence	-0.14805	0.0994679	sex
N17-N19	2	1925	0.0287	0.2572	0.0793	impact	0.10915	0.12721	sex
N17-N19	2	1935	0.0287	0.2572	0.0793	incidence	0.09315	0.0927039	sex
N17-N19	2	1935	0.0287	0.2572	0.0793	impact	0.35035	0.121994	sex
N17-N19	2	1945	0.0287	0.2572	0.0793	incidence	0.07863	0.0816751	sex
N17-N19	2	1945	0.0287	0.2572	0.0793	impact	0.33583	0.113839	sex
N17-N19	2	1955	0.0287	0.2572	0.0793	incidence	0.04037	0.0521	sex
N17-N19	2	1955	0.0287	0.2572	0.0793	impact	0.29757	0.0948836	sex
I80-I89	1	1915	0.0281	0.3714	0.0539	incidence	0.3881	0.111452	sex
I80-I89	1	1915	0.0281	0.3714	0.0539	impact	0.7595	0.123801	sex
I80-I89	1	1925	0.0281	0.3714	0.0539	incidence	0.10496	0.0595336	sex
I80-I89	1	1925	0.0281	0.3714	0.0539	impact	0.47636	0.0803085	sex
I80-I89	1	1935	0.0281	0.3714	0.0539	incidence	0.19824	0.0427001	sex
I80-I89	1	1935	0.0281	0.3714	0.0539	impact	0.56964	0.0687642	sex
I80-I89	1	1945	0.0281	0.3714	0.0539	incidence	0.26099	0.0314917	sex
I80-I89	1	1945	0.0281	0.3714	0.0539	impact	0.63239	0.0624255	sex
I80-I89	1	1955	0.0281	0.3714	0.0539	incidence	0.19801	0.0182	sex
I80-I89	1	1955	0.0281	0.3714	0.0539	impact	0.56941	0.0568898	sex
I80-I89	2	1915	0.0285	0.0909	0.0634	incidence	0.1976	0.0801643	sex
I80-I89	2	1915	0.0285	0.0909	0.0634	impact	0.2885	0.102205	sex
I80-I89	2	1925	0.0285	0.0909	0.0634	incidence	0.21587	0.0547642	sex
I80-I89	2	1925	0.0285	0.0909	0.0634	impact	0.30677	0.0837776	sex
I80-I89	2	1935	0.0285	0.0909	0.0634	incidence	0.16693	0.0420215	sex
I80-I89	2	1935	0.0285	0.0909	0.0634	impact	0.25783	0.0760616	sex
I80-I89	2	1945	0.0285	0.0909	0.0634	incidence	0.27575	0.0311554	sex
I80-I89	2	1945	0.0285	0.0909	0.0634	impact	0.36665	0.0706415	sex
I80-I89	2	1955	0.0285	0.0909	0.0634	incidence	0.29525	0.0179	sex
I80-I89	2	1955	0.0285	0.0909	0.0634	impact	0.38615	0.0658784	sex
K90-K93	1	1915	0.0302	0.2217	0.0834	incidence	0.0864	0.0966288	sex
K90-K93	1	1915	0.0302	0.2217	0.0834	impact	0.3081	0.127643	sex
K90-K93	1	1925	0.0302	0.2217	0.0834	incidence	0.10234	0.0699854	sex
K90-K93	1	1925	0.0302	0.2217	0.0834	impact	0.32404	0.108874	sex
K90-K93	1	1935	0.0302	0.2217	0.0834	incidence	0.03256	0.0586409	sex
K90-K93	1	1935	0.0302	0.2217	0.0834	impact	0.25426	0.101953	sex
K90-K93	1	1945	0.0302	0.2217	0.0834	incidence	0.03636	0.0472411	sex
K90-K93	1	1945	0.0302	0.2217	0.0834	impact	0.25806	0.0958503	sex
K90-K93	1	1955	0.0302	0.2217	0.0834	incidence	-0.00546	0.0286	sex
K90-K93	1	1955	0.0302	0.2217	0.0834	impact	0.21624	0.0881676	sex
K90-K93	2	1915	0.0226	0.1189	0.0755	incidence	0.0774	0.0886763	sex
K90-K93	2	1915	0.0226	0.1189	0.0755	impact	0.1963	0.116463	sex
K90-K93	2	1925	0.0226	0.1189	0.0755	incidence	0.12696	0.0743178	sex
K90-K93	2	1925	0.0226	0.1189	0.0755	impact	0.24586	0.10594	sex
K90-K93	2	1935	0.0226	0.1189	0.0755	incidence	0.00024	0.0646888	sex
K90-K93	2	1935	0.0226	0.1189	0.0755	impact	0.11914	0.0994228	sex
K90-K93	2	1945	0.0226	0.1189	0.0755	incidence	-0.09527	0.0525601	sex
K90-K93	2	1945	0.0226	0.1189	0.0755	impact	0.02363	0.0919935	sex
K90-K93	2	1955	0.0226	0.1189	0.0755	incidence	-0.21273	0.0316	sex
K90-K93	2	1955	0.0226	0.1189	0.0755	impact	-0.09383	0.0818463	sex
I70-I79	1	1915	0.03	0.1357	0.0437	incidence	0.1092	0.0997038	sex
I70-I79	1	1915	0.03	0.1357	0.0437	impact	0.2449	0.10886	sex
I70-I79	1	1925	0.03	0.1357	0.0437	incidence	0.36925	0.0699426	sex
I70-I79	1	1925	0.03	0.1357	0.0437	impact	0.50495	0.0824722	sex
I70-I79	1	1935	0.03	0.1357	0.0437	incidence	0.45645	0.0621619	sex
I70-I79	1	1935	0.03	0.1357	0.0437	impact	0.59215	0.0759855	sex
I70-I79	1	1945	0.03	0.1357	0.0437	incidence	0.47805	0.0546996	sex
I70-I79	1	1945	0.03	0.1357	0.0437	impact	0.61375	0.0700124	sex
I70-I79	1	1955	0.03	0.1357	0.0437	incidence	0.38195	0.0354	sex
I70-I79	1	1955	0.03	0.1357	0.0437	impact	0.51765	0.0562392	sex
I70-I79	2	1915	0.0226	0.0218	0.0605	incidence	0.168	0.102311	sex
I70-I79	2	1915	0.0226	0.0218	0.0605	impact	0.1898	0.118861	sex
I70-I79	2	1925	0.0226	0.0218	0.0605	incidence	0.40739	0.087273	sex
I70-I79	2	1925	0.0226	0.0218	0.0605	impact	0.42919	0.106192	sex
I70-I79	2	1935	0.0226	0.0218	0.0605	incidence	0.57661	0.0795705	sex
I70-I79	2	1935	0.0226	0.0218	0.0605	impact	0.59841	0.0999585	sex
I70-I79	2	1945	0.0226	0.0218	0.0605	incidence	0.52262	0.0689529	sex
I70-I79	2	1945	0.0226	0.0218	0.0605	impact	0.54442	0.0917319	sex
I70-I79	2	1955	0.0226	0.0218	0.0605	incidence	0.57738	0.0435	sex
I70-I79	2	1955	0.0226	0.0218	0.0605	impact	0.59918	0.0745151	sex
K50-K52	1	1915	0.0216	0.1408	0.0282	incidence	0.2617	0.10522	sex
K50-K52	1	1915	0.0216	0.1408	0.0282	impact	0.4025	0.108933	sex
K50-K52	1	1925	0.0216	0.1408	0.0282	incidence	0.28652	0.0732517	sex
K50-K52	1	1925	0.0216	0.1408	0.0282	impact	0.42732	0.0784924	sex
K50-K52	1	1935	0.0216	0.1408	0.0282	incidence	0.37488	0.0599257	sex
K50-K52	1	1935	0.0216	0.1408	0.0282	impact	0.51568	0.0662294	sex
K50-K52	1	1945	0.0216	0.1408	0.0282	incidence	0.39694	0.0468038	sex
K50-K52	1	1945	0.0216	0.1408	0.0282	impact	0.53774	0.0546428	sex
K50-K52	1	1955	0.0216	0.1408	0.0282	incidence	0.35606	0.0276	sex
K50-K52	1	1955	0.0216	0.1408	0.0282	impact	0.49686	0.0394588	sex
K50-K52	2	1915	0.0273	0.092	0.0373	incidence	0.1237	0.0751415	sex
K50-K52	2	1915	0.0273	0.092	0.0373	impact	0.2157	0.08389	sex
K50-K52	2	1925	0.0273	0.092	0.0373	incidence	0.30682	0.0587991	sex
K50-K52	2	1925	0.0273	0.092	0.0373	impact	0.39882	0.069632	sex
K50-K52	2	1935	0.0273	0.092	0.0373	incidence	0.36828	0.0497039	sex
K50-K52	2	1935	0.0273	0.092	0.0373	impact	0.46028	0.0621431	sex
K50-K52	2	1945	0.0273	0.092	0.0373	incidence	0.36265	0.0394816	sex
K50-K52	2	1945	0.0273	0.092	0.0373	impact	0.45465	0.0543147	sex
K50-K52	2	1955	0.0273	0.092	0.0373	incidence	0.33635	0.0234	sex
K50-K52	2	1955	0.0273	0.092	0.0373	impact	0.42835	0.0440324	sex
S00-S09	1	1915	0.0332	0.1778	0.0483	incidence	-0.2562	0.0804167	sex
S00-S09	1	1915	0.0332	0.1778	0.0483	impact	-0.0784	0.0938069	sex
S00-S09	1	1925	0.0332	0.1778	0.0483	incidence	-0.1698	0.0597679	sex
S00-S09	1	1925	0.0332	0.1778	0.0483	impact	0.008	0.0768446	sex
S00-S09	1	1935	0.0332	0.1778	0.0483	incidence	0.1059	0.0494773	sex
S00-S09	1	1935	0.0332	0.1778	0.0483	impact	0.2837	0.069144	sex
S00-S09	1	1945	0.0332	0.1778	0.0483	incidence	0.37286	0.038292	sex
S00-S09	1	1945	0.0332	0.1778	0.0483	impact	0.55066	0.0616374	sex
S00-S09	1	1955	0.0332	0.1778	0.0483	incidence	0.34514	0.0222	sex
S00-S09	1	1955	0.0332	0.1778	0.0483	impact	0.52294	0.0531576	sex
S00-S09	2	1915	0.0171	-0.1563	0.0589	incidence	-0.1956	0.0847732	sex
S00-S09	2	1915	0.0171	-0.1563	0.0589	impact	-0.3519	0.103226	sex
S00-S09	2	1925	0.0171	-0.1563	0.0589	incidence	-0.11854	0.077331	sex
S00-S09	2	1925	0.0171	-0.1563	0.0589	impact	-0.27484	0.0972075	sex
S00-S09	2	1935	0.0171	-0.1563	0.0589	incidence	-0.06236	0.0700274	sex
S00-S09	2	1935	0.0171	-0.1563	0.0589	impact	-0.21866	0.0915044	sex
S00-S09	2	1945	0.0171	-0.1563	0.0589	incidence	0.0723	0.0565545	sex
S00-S09	2	1945	0.0171	-0.1563	0.0589	impact	-0.084	0.0816555	sex
S00-S09	2	1955	0.0171	-0.1563	0.0589	incidence	0.1417	0.0329	sex
S00-S09	2	1955	0.0171	-0.1563	0.0589	impact	-0.0146	0.0674657	sex
C50-C50	1	1915	0.000565	1.1527	0.6432	incidence	NA	NA	sex
C50-C50	1	1915	0.000565	1.1527	0.6432	impact	NA	NA	sex
C50-C50	1	1925	0.000565	1.1527	0.6432	incidence	-0.08219	0.610565	sex
C50-C50	1	1925	0.000565	1.1527	0.6432	impact	1.07051	0.886846	sex
C50-C50	1	1935	0.000565	1.1527	0.6432	incidence	0.37979	0.510155	sex
C50-C50	1	1935	0.000565	1.1527	0.6432	impact	1.53249	0.820953	sex
C50-C50	1	1945	0.000565	1.1527	0.6432	incidence	0.66213	0.440066	sex
C50-C50	1	1945	0.000565	1.1527	0.6432	impact	1.81483	0.779336	sex
C50-C50	1	1955	0.000565	1.1527	0.6432	incidence	0.78787	0.283	sex
C50-C50	1	1955	0.000565	1.1527	0.6432	impact	1.94057	0.702706	sex
C50-C50	2	1915	0.0434	1.1487	0.0744	incidence	0.2888	0.0906015	sex
C50-C50	2	1915	0.0434	1.1487	0.0744	impact	1.4375	0.117235	sex
C50-C50	2	1925	0.0434	1.1487	0.0744	incidence	0.23679	0.0553014	sex
C50-C50	2	1925	0.0434	1.1487	0.0744	impact	1.38549	0.0927017	sex
C50-C50	2	1935	0.0434	1.1487	0.0744	incidence	0.12331	0.0426522	sex
C50-C50	2	1935	0.0434	1.1487	0.0744	impact	1.27201	0.0857588	sex
C50-C50	2	1945	0.0434	1.1487	0.0744	incidence	0.18162	0.0330601	sex
C50-C50	2	1945	0.0434	1.1487	0.0744	impact	1.33032	0.0814146	sex
C50-C50	2	1955	0.0434	1.1487	0.0744	incidence	0.21438	0.0199	sex
C50-C50	2	1955	0.0434	1.1487	0.0744	impact	1.36308	0.0770154	sex
C60-C63	1	1915	0.0287	0.6987	0.0671	incidence	0.205	0.107842	sex
C60-C63	1	1915	0.0287	0.6987	0.0671	impact	0.9037	0.127013	sex
C60-C63	1	1925	0.0287	0.6987	0.0671	incidence	0.3432	0.0816589	sex
C60-C63	1	1925	0.0287	0.6987	0.0671	impact	1.0419	0.105691	sex
C60-C63	1	1935	0.0287	0.6987	0.0671	incidence	0.1078	0.074023	sex
C60-C63	1	1935	0.0287	0.6987	0.0671	impact	0.8065	0.099909	sex
C60-C63	1	1945	0.0287	0.6987	0.0671	incidence	-0.0825	0.0672836	sex
C60-C63	1	1945	0.0287	0.6987	0.0671	impact	0.6162	0.0950236	sex
C60-C63	1	1955	0.0287	0.6987	0.0671	incidence	-0.0995	0.0448	sex
C60-C63	1	1955	0.0287	0.6987	0.0671	impact	0.5992	0.0806812	sex
C60-C63	2	1915	-3.57e-06	NA	NA	incidence	NA	0	sex
C60-C63	2	1915	-3.57e-06	NA	NA	impact	NA	0	sex
C60-C63	2	1925	-3.57e-06	NA	NA	incidence	NA	NA	sex
C60-C63	2	1925	-3.57e-06	NA	NA	impact	NA	NA	sex
C60-C63	2	1935	-3.57e-06	NA	NA	incidence	NA	NA	sex
C60-C63	2	1935	-3.57e-06	NA	NA	impact	NA	NA	sex
C60-C63	2	1945	-3.57e-06	NA	NA	incidence	NA	NA	sex
C60-C63	2	1945	-3.57e-06	NA	NA	impact	NA	NA	sex
C60-C63	2	1955	-3.57e-06	NA	NA	incidence	NA	NA	sex
C60-C63	2	1955	-3.57e-06	NA	NA	impact	NA	NA	sex
G30-G32	1	1915	0.00307	-0.0377	0.2699	incidence	0.1939	0.328765	sex
G30-G32	1	1915	0.00307	-0.0377	0.2699	impact	0.1562	0.425362	sex
G30-G32	1	1925	0.00307	-0.0377	0.2699	incidence	0.21645	0.297504	sex
G30-G32	1	1925	0.00307	-0.0377	0.2699	impact	0.17875	0.401689	sex
G30-G32	1	1935	0.00307	-0.0377	0.2699	incidence	0.48805	0.276134	sex
G30-G32	1	1935	0.00307	-0.0377	0.2699	impact	0.45035	0.38613	sex
G30-G32	1	1945	0.00307	-0.0377	0.2699	incidence	0.50373	0.237542	sex
G30-G32	1	1945	0.00307	-0.0377	0.2699	impact	0.46603	0.359544	sex
G30-G32	1	1955	0.00307	-0.0377	0.2699	incidence	0.21327	0.149	sex
G30-G32	1	1955	0.00307	-0.0377	0.2699	impact	0.17557	0.308297	sex
G30-G32	2	1915	0.00265	0.064	0.1112	incidence	-0.0443	0.37165	sex
G30-G32	2	1915	0.00265	0.064	0.1112	impact	0.0197	0.387929	sex
G30-G32	2	1925	0.00265	0.064	0.1112	incidence	0.3435	0.357535	sex
G30-G32	2	1925	0.00265	0.064	0.1112	impact	0.4075	0.374429	sex
G30-G32	2	1935	0.00265	0.064	0.1112	incidence	0.5937	0.343111	sex
G30-G32	2	1935	0.00265	0.064	0.1112	impact	0.6577	0.360681	sex
G30-G32	2	1945	0.00265	0.064	0.1112	incidence	0.30487	0.304731	sex
G30-G32	2	1945	0.00265	0.064	0.1112	impact	0.36887	0.324386	sex
G30-G32	2	1955	0.00265	0.064	0.1112	incidence	0.11713	0.194	sex
G30-G32	2	1955	0.00265	0.064	0.1112	impact	0.18113	0.22361	sex
ACT-DTH	1	1915	NA	NA	NA	incidence	-0.028	0.0829001	deprivation
ACT-DTH	1	1915	NA	NA	NA	impact	-0.028	0.0829001	deprivation
ACT-DTH	1	1925	NA	NA	NA	incidence	0.235	0.079489	deprivation
ACT-DTH	1	1925	NA	NA	NA	impact	0.235	0.079489	deprivation
ACT-DTH	1	1935	NA	NA	NA	incidence	0.335	0.0759084	deprivation
ACT-DTH	1	1935	NA	NA	NA	impact	0.335	0.0759084	deprivation
ACT-DTH	1	1945	NA	NA	NA	incidence	0.393	0.0682469	deprivation
ACT-DTH	1	1945	NA	NA	NA	impact	0.393	0.0682469	deprivation
ACT-DTH	1	1955	NA	NA	NA	incidence	0.33	0.0442	deprivation
ACT-DTH	1	1955	NA	NA	NA	impact	0.33	0.0442	deprivation
ACT-DTH	2	1915	NA	NA	NA	incidence	-0.063	0.0768294	deprivation
ACT-DTH	2	1915	NA	NA	NA	impact	-0.063	0.0768294	deprivation
ACT-DTH	2	1925	NA	NA	NA	incidence	0.155	0.0729871	deprivation
ACT-DTH	2	1925	NA	NA	NA	impact	0.155	0.0729871	deprivation
ACT-DTH	2	1935	NA	NA	NA	incidence	0.321	0.0692651	deprivation
ACT-DTH	2	1935	NA	NA	NA	impact	0.321	0.0692651	deprivation
ACT-DTH	2	1945	NA	NA	NA	incidence	0.346	0.06214	deprivation
ACT-DTH	2	1945	NA	NA	NA	impact	0.346	0.06214	deprivation
ACT-DTH	2	1955	NA	NA	NA	incidence	0.297	0.0403	deprivation
ACT-DTH	2	1955	NA	NA	NA	impact	0.297	0.0403	deprivation
ACT-DTH	3	1915	NA	NA	NA	incidence	-0.101	0.0728629	deprivation
ACT-DTH	3	1915	NA	NA	NA	impact	-0.101	0.0728629	deprivation
ACT-DTH	3	1925	NA	NA	NA	incidence	0.131	0.0694495	deprivation
ACT-DTH	3	1925	NA	NA	NA	impact	0.131	0.0694495	deprivation
ACT-DTH	3	1935	NA	NA	NA	incidence	0.343	0.0660095	deprivation
ACT-DTH	3	1935	NA	NA	NA	impact	0.343	0.0660095	deprivation
ACT-DTH	3	1945	NA	NA	NA	incidence	0.332	0.0591684	deprivation
ACT-DTH	3	1945	NA	NA	NA	impact	0.332	0.0591684	deprivation
ACT-DTH	3	1955	NA	NA	NA	incidence	0.305	0.0383	deprivation
ACT-DTH	3	1955	NA	NA	NA	impact	0.305	0.0383	deprivation
ACT-DTH	4	1915	NA	NA	NA	incidence	-0.106	0.0693334	deprivation
ACT-DTH	4	1915	NA	NA	NA	impact	-0.106	0.0693334	deprivation
ACT-DTH	4	1925	NA	NA	NA	incidence	0.144	0.065704	deprivation
ACT-DTH	4	1925	NA	NA	NA	impact	0.144	0.065704	deprivation
ACT-DTH	4	1935	NA	NA	NA	incidence	0.299	0.0623298	deprivation
ACT-DTH	4	1935	NA	NA	NA	impact	0.299	0.0623298	deprivation
ACT-DTH	4	1945	NA	NA	NA	incidence	0.299	0.0559683	deprivation
ACT-DTH	4	1945	NA	NA	NA	impact	0.299	0.0559683	deprivation
ACT-DTH	4	1955	NA	NA	NA	incidence	0.274	0.0363	deprivation
ACT-DTH	4	1955	NA	NA	NA	impact	0.274	0.0363	deprivation
ACT-DTH	5	1915	NA	NA	NA	incidence	-0.093	0.0657317	deprivation
ACT-DTH	5	1915	NA	NA	NA	impact	-0.093	0.0657317	deprivation
ACT-DTH	5	1925	NA	NA	NA	incidence	0.102	0.062097	deprivation
ACT-DTH	5	1925	NA	NA	NA	impact	0.102	0.062097	deprivation
ACT-DTH	5	1935	NA	NA	NA	incidence	0.312	0.0588646	deprivation
ACT-DTH	5	1935	NA	NA	NA	impact	0.312	0.0588646	deprivation
ACT-DTH	5	1945	NA	NA	NA	incidence	0.299	0.0527795	deprivation
ACT-DTH	5	1945	NA	NA	NA	impact	0.299	0.0527795	deprivation
ACT-DTH	5	1955	NA	NA	NA	incidence	0.281	0.0342	deprivation
ACT-DTH	5	1955	NA	NA	NA	impact	0.281	0.0342	deprivation
ACT-DTH	6	1915	NA	NA	NA	incidence	-0.039	0.0631311	deprivation
ACT-DTH	6	1915	NA	NA	NA	impact	-0.039	0.0631311	deprivation
ACT-DTH	6	1925	NA	NA	NA	incidence	0.144	0.0591278	deprivation
ACT-DTH	6	1925	NA	NA	NA	impact	0.144	0.0591278	deprivation
ACT-DTH	6	1935	NA	NA	NA	incidence	0.298	0.0559647	deprivation
ACT-DTH	6	1935	NA	NA	NA	impact	0.298	0.0559647	deprivation
ACT-DTH	6	1945	NA	NA	NA	incidence	0.314	0.0500899	deprivation
ACT-DTH	6	1945	NA	NA	NA	impact	0.314	0.0500899	deprivation
ACT-DTH	6	1955	NA	NA	NA	incidence	0.326	0.0324	deprivation
ACT-DTH	6	1955	NA	NA	NA	impact	0.326	0.0324	deprivation
ACT-DTH	7	1915	NA	NA	NA	incidence	-0.03	0.0592426	deprivation
ACT-DTH	7	1915	NA	NA	NA	impact	-0.03	0.0592426	deprivation
ACT-DTH	7	1925	NA	NA	NA	incidence	0.121	0.0553104	deprivation
ACT-DTH	7	1925	NA	NA	NA	impact	0.121	0.0553104	deprivation
ACT-DTH	7	1935	NA	NA	NA	incidence	0.23	0.0522851	deprivation
ACT-DTH	7	1935	NA	NA	NA	impact	0.23	0.0522851	deprivation
ACT-DTH	7	1945	NA	NA	NA	incidence	0.333	0.046825	deprivation
ACT-DTH	7	1945	NA	NA	NA	impact	0.333	0.046825	deprivation
ACT-DTH	7	1955	NA	NA	NA	incidence	0.236	0.0303	deprivation
ACT-DTH	7	1955	NA	NA	NA	impact	0.236	0.0303	deprivation
ACT-DTH	8	1915	NA	NA	NA	incidence	-0.047	0.0560742	deprivation
ACT-DTH	8	1915	NA	NA	NA	impact	-0.047	0.0560742	deprivation
ACT-DTH	8	1925	NA	NA	NA	incidence	0.137	0.0519172	deprivation
ACT-DTH	8	1925	NA	NA	NA	impact	0.137	0.0519172	deprivation
ACT-DTH	8	1935	NA	NA	NA	incidence	0.247	0.048893	deprivation
ACT-DTH	8	1935	NA	NA	NA	impact	0.247	0.048893	deprivation
ACT-DTH	8	1945	NA	NA	NA	incidence	0.28	0.0435718	deprivation
ACT-DTH	8	1945	NA	NA	NA	impact	0.28	0.0435718	deprivation
ACT-DTH	8	1955	NA	NA	NA	incidence	0.279	0.0281	deprivation
ACT-DTH	8	1955	NA	NA	NA	impact	0.279	0.0281	deprivation
ACT-DTH	9	1915	NA	NA	NA	incidence	-0.071	0.0537636	deprivation
ACT-DTH	9	1915	NA	NA	NA	impact	-0.071	0.0537636	deprivation
ACT-DTH	9	1925	NA	NA	NA	incidence	0.117	0.0490936	deprivation
ACT-DTH	9	1925	NA	NA	NA	impact	0.117	0.0490936	deprivation
ACT-DTH	9	1935	NA	NA	NA	incidence	0.224	0.0459253	deprivation
ACT-DTH	9	1935	NA	NA	NA	impact	0.224	0.0459253	deprivation
ACT-DTH	9	1945	NA	NA	NA	incidence	0.271	0.0406774	deprivation
ACT-DTH	9	1945	NA	NA	NA	impact	0.271	0.0406774	deprivation
ACT-DTH	9	1955	NA	NA	NA	incidence	0.339	0.0261	deprivation
ACT-DTH	9	1955	NA	NA	NA	impact	0.339	0.0261	deprivation
ACT-DTH	10	1915	NA	NA	NA	incidence	-0.049	0.0510547	deprivation
ACT-DTH	10	1915	NA	NA	NA	impact	-0.049	0.0510547	deprivation
ACT-DTH	10	1925	NA	NA	NA	incidence	0.018	0.045428	deprivation
ACT-DTH	10	1925	NA	NA	NA	impact	0.018	0.045428	deprivation
ACT-DTH	10	1935	NA	NA	NA	incidence	0.198	0.0418336	deprivation
ACT-DTH	10	1935	NA	NA	NA	impact	0.198	0.0418336	deprivation
ACT-DTH	10	1945	NA	NA	NA	incidence	0.315	0.0365168	deprivation
ACT-DTH	10	1945	NA	NA	NA	impact	0.315	0.0365168	deprivation
ACT-DTH	10	1955	NA	NA	NA	incidence	0.34	0.0232	deprivation
ACT-DTH	10	1955	NA	NA	NA	impact	0.34	0.0232	deprivation
EST-DTH	1	1915	1.09419	0.220375	0.156203	incidence	0.0372632	0.0388836	deprivation
EST-DTH	1	1915	1.09419	0.220375	0.156203	impact	0.257838	0.0506019	deprivation
EST-DTH	1	1925	1.09419	0.220375	0.156203	incidence	0.170985	0.0316727	deprivation
EST-DTH	1	1925	1.09419	0.220375	0.156203	impact	0.39156	0.0452965	deprivation
EST-DTH	1	1935	1.09419	0.220375	0.156203	incidence	0.151791	0.0285718	deprivation
EST-DTH	1	1935	1.09419	0.220375	0.156203	impact	0.372366	0.0431852	deprivation
EST-DTH	1	1945	1.09419	0.220375	0.156203	incidence	0.160524	0.0247997	deprivation
EST-DTH	1	1945	1.09419	0.220375	0.156203	impact	0.381099	0.0407878	deprivation
EST-DTH	1	1955	1.09419	0.220375	0.156203	incidence	0.056267	0.0158493	deprivation
EST-DTH	1	1955	1.09419	0.220375	0.156203	impact	0.276993	0.0360239	deprivation
EST-DTH	2	1915	1.16032	0.159176	0.13497	incidence	-0.00165538	0.0372982	deprivation
EST-DTH	2	1915	1.16032	0.159176	0.13497	impact	0.157312	0.0469925	deprivation
EST-DTH	2	1925	1.16032	0.159176	0.13497	incidence	0.162328	0.0292631	deprivation
EST-DTH	2	1925	1.16032	0.159176	0.13497	impact	0.321296	0.0409081	deprivation
EST-DTH	2	1935	1.16032	0.159176	0.13497	incidence	0.19329	0.0260707	deprivation
EST-DTH	2	1935	1.16032	0.159176	0.13497	impact	0.352258	0.0386888	deprivation
EST-DTH	2	1945	1.16032	0.159176	0.13497	incidence	0.150786	0.0224652	deprivation
EST-DTH	2	1945	1.16032	0.159176	0.13497	impact	0.309753	0.0363569	deprivation
EST-DTH	2	1955	1.16032	0.159176	0.13497	incidence	0.0735699	0.0143283	deprivation
EST-DTH	2	1955	1.16032	0.159176	0.13497	impact	0.230651	0.0319526	deprivation
EST-DTH	3	1915	1.17692	0.118622	0.142951	incidence	-0.0173544	0.0362426	deprivation
EST-DTH	3	1915	1.17692	0.118622	0.142951	impact	0.101268	0.0484442	deprivation
EST-DTH	3	1925	1.17692	0.118622	0.142951	incidence	0.149892	0.0292034	deprivation
EST-DTH	3	1925	1.17692	0.118622	0.142951	impact	0.269727	0.04338	deprivation
EST-DTH	3	1935	1.17692	0.118622	0.142951	incidence	0.194205	0.0262397	deprivation
EST-DTH	3	1935	1.17692	0.118622	0.142951	impact	0.313248	0.0414465	deprivation
EST-DTH	3	1945	1.17692	0.118622	0.142951	incidence	0.162731	0.0226547	deprivation
EST-DTH	3	1945	1.17692	0.118622	0.142951	impact	0.281353	0.0393261	deprivation
EST-DTH	3	1955	1.17692	0.118622	0.142951	incidence	0.111623	0.0143795	deprivation
EST-DTH	3	1955	1.17692	0.118622	0.142951	impact	0.230245	0.0352147	deprivation
EST-DTH	4	1915	1.23779	0.17586	0.119241	incidence	0.0184608	0.0358598	deprivation
EST-DTH	4	1915	1.23779	0.17586	0.119241	impact	0.197983	0.0443909	deprivation
EST-DTH	4	1925	1.23779	0.17586	0.119241	incidence	0.161704	0.0283511	deprivation
EST-DTH	4	1925	1.23779	0.17586	0.119241	impact	0.340737	0.0386304	deprivation
EST-DTH	4	1935	1.23779	0.17586	0.119241	incidence	0.207905	0.0254715	deprivation
EST-DTH	4	1935	1.23779	0.17586	0.119241	impact	0.386938	0.0365694	deprivation
EST-DTH	4	1945	1.23779	0.17586	0.119241	incidence	0.186762	0.0221675	deprivation
EST-DTH	4	1945	1.23779	0.17586	0.119241	impact	0.364987	0.0343107	deprivation
EST-DTH	4	1955	1.23779	0.17586	0.119241	incidence	0.134075	0.0141464	deprivation
EST-DTH	4	1955	1.23779	0.17586	0.119241	impact	0.309935	0.0298166	deprivation
EST-DTH	5	1915	1.31797	0.173064	0.117517	incidence	0.0344548	0.0343233	deprivation
EST-DTH	5	1915	1.31797	0.173064	0.117517	impact	0.207519	0.0425649	deprivation
EST-DTH	5	1925	1.31797	0.173064	0.117517	incidence	0.10728	0.0272886	deprivation
EST-DTH	5	1925	1.31797	0.173064	0.117517	impact	0.278334	0.0370903	deprivation
EST-DTH	5	1935	1.31797	0.173064	0.117517	incidence	0.198738	0.0245202	deprivation
EST-DTH	5	1935	1.31797	0.173064	0.117517	impact	0.371802	0.0351415	deprivation
EST-DTH	5	1945	1.31797	0.173064	0.117517	incidence	0.167284	0.0212511	deprivation
EST-DTH	5	1945	1.31797	0.173064	0.117517	impact	0.340348	0.0329438	deprivation
EST-DTH	5	1955	1.31797	0.173064	0.117517	incidence	0.10794	0.0135255	deprivation
EST-DTH	5	1955	1.31797	0.173064	0.117517	impact	0.281004	0.0285766	deprivation
EST-DTH	6	1915	1.41303	0.192789	0.117143	incidence	0.0216945	0.0341013	deprivation
EST-DTH	6	1915	1.41303	0.192789	0.117143	impact	0.213932	0.0423335	deprivation
EST-DTH	6	1925	1.41303	0.192789	0.117143	incidence	0.132645	0.0263413	deprivation
EST-DTH	6	1925	1.41303	0.192789	0.117143	impact	0.324876	0.0363782	deprivation
EST-DTH	6	1935	1.41303	0.192789	0.117143	incidence	0.194649	0.0236013	deprivation
EST-DTH	6	1935	1.41303	0.192789	0.117143	impact	0.385883	0.034449	deprivation
EST-DTH	6	1945	1.41303	0.192789	0.117143	incidence	0.171658	0.0204572	deprivation
EST-DTH	6	1945	1.41303	0.192789	0.117143	impact	0.364644	0.032383	deprivation
EST-DTH	6	1955	1.41303	0.192789	0.117143	incidence	0.131606	0.0130228	deprivation
EST-DTH	6	1955	1.41303	0.192789	0.117143	impact	0.324099	0.0282966	deprivation
EST-DTH	7	1915	1.49752	0.178709	0.109984	incidence	0.0254304	0.0323413	deprivation
EST-DTH	7	1915	1.49752	0.178709	0.109984	impact	0.206393	0.039757	deprivation
EST-DTH	7	1925	1.49752	0.178709	0.109984	incidence	0.128995	0.0250878	deprivation
EST-DTH	7	1925	1.49752	0.178709	0.109984	impact	0.309832	0.0341218	deprivation
EST-DTH	7	1935	1.49752	0.178709	0.109984	incidence	0.158466	0.0224989	deprivation
EST-DTH	7	1935	1.49752	0.178709	0.109984	impact	0.339248	0.0322693	deprivation
EST-DTH	7	1945	1.49752	0.178709	0.109984	incidence	0.179792	0.0195015	deprivation
EST-DTH	7	1945	1.49752	0.178709	0.109984	impact	0.361191	0.0302624	deprivation
EST-DTH	7	1955	1.49752	0.178709	0.109984	incidence	0.124004	0.0124087	deprivation
EST-DTH	7	1955	1.49752	0.178709	0.109984	impact	0.305555	0.0262736	deprivation
EST-DTH	8	1915	1.54785	0.209738	0.0952748	incidence	0.0548049	0.0311077	deprivation
EST-DTH	8	1915	1.54785	0.209738	0.0952748	impact	0.264542	0.0374296	deprivation
EST-DTH	8	1925	1.54785	0.209738	0.0952748	incidence	0.116388	0.0241204	deprivation
EST-DTH	8	1925	1.54785	0.209738	0.0952748	impact	0.326125	0.0318603	deprivation
EST-DTH	8	1935	1.54785	0.209738	0.0952748	incidence	0.170995	0.0215748	deprivation
EST-DTH	8	1935	1.54785	0.209738	0.0952748	impact	0.380733	0.0299793	deprivation
EST-DTH	8	1945	1.54785	0.209738	0.0952748	incidence	0.191258	0.0186658	deprivation
EST-DTH	8	1945	1.54785	0.209738	0.0952748	impact	0.400995	0.0279589	deprivation
EST-DTH	8	1955	1.54785	0.209738	0.0952748	incidence	0.118805	0.0118641	deprivation
EST-DTH	8	1955	1.54785	0.209738	0.0952748	impact	0.328542	0.0239592	deprivation
EST-DTH	9	1915	1.61129	0.161927	0.108405	incidence	-0.072566	0.0318326	deprivation
EST-DTH	9	1915	1.61129	0.161927	0.108405	impact	0.0893612	0.0396844	deprivation
EST-DTH	9	1925	1.61129	0.161927	0.108405	incidence	0.113383	0.0235343	deprivation
EST-DTH	9	1925	1.61129	0.161927	0.108405	impact	0.27531	0.0333976	deprivation
EST-DTH	9	1935	1.61129	0.161927	0.108405	incidence	0.144567	0.0208612	deprivation
EST-DTH	9	1935	1.61129	0.161927	0.108405	impact	0.306494	0.0315709	deprivation
EST-DTH	9	1945	1.61129	0.161927	0.108405	incidence	0.150543	0.0179307	deprivation
EST-DTH	9	1945	1.61129	0.161927	0.108405	impact	0.31247	0.0297161	deprivation
EST-DTH	9	1955	1.61129	0.161927	0.108405	incidence	0.127251	0.0113461	deprivation
EST-DTH	9	1955	1.61129	0.161927	0.108405	impact	0.289178	0.026273	deprivation
EST-DTH	10	1915	1.71953	0.19697	0.10725	incidence	-0.0107495	0.031811	deprivation
EST-DTH	10	1915	1.71953	0.19697	0.10725	impact	0.186221	0.039431	deprivation
EST-DTH	10	1925	1.71953	0.19697	0.10725	incidence	0.034141	0.022711	deprivation
EST-DTH	10	1925	1.71953	0.19697	0.10725	impact	0.231111	0.0325369	deprivation
EST-DTH	10	1935	1.71953	0.19697	0.10725	incidence	0.130042	0.0196956	deprivation
EST-DTH	10	1935	1.71953	0.19697	0.10725	impact	0.327013	0.0305086	deprivation
EST-DTH	10	1945	1.71953	0.19697	0.10725	incidence	0.174318	0.0167021	deprivation
EST-DTH	10	1945	1.71953	0.19697	0.10725	impact	0.371288	0.0286674	deprivation
EST-DTH	10	1955	1.71953	0.19697	0.10725	incidence	0.147328	0.010469	deprivation
EST-DTH	10	1955	1.71953	0.19697	0.10725	impact	0.344298	0.0255433	deprivation
J09-J18	1	1915	0.06736	-0.0811	0.2164	incidence	-0.25274	0.177647	deprivation
J09-J18	1	1915	0.06736	-0.0811	0.2164	impact	-0.33384	0.279978	deprivation
J09-J18	1	1925	0.06736	-0.0811	0.2164	incidence	-0.1329	0.164035	deprivation
J09-J18	1	1925	0.06736	-0.0811	0.2164	impact	-0.214	0.271544	deprivation
J09-J18	1	1935	0.06736	-0.0811	0.2164	incidence	-0.09771	0.153365	deprivation
J09-J18	1	1935	0.06736	-0.0811	0.2164	impact	-0.17881	0.265235	deprivation
J09-J18	1	1945	0.06736	-0.0811	0.2164	incidence	-0.196809	0.134162	deprivation
J09-J18	1	1945	0.06736	-0.0811	0.2164	impact	-0.277909	0.254614	deprivation
J09-J18	1	1955	0.06736	-0.0811	0.2164	incidence	-0.297931	0.085	deprivation
J09-J18	1	1955	0.06736	-0.0811	0.2164	impact	-0.379031	0.232495	deprivation
J09-J18	2	1915	0.06656	0.186	0.1322	incidence	-0.28315	0.168873	deprivation
J09-J18	2	1915	0.06656	0.186	0.1322	impact	-0.09715	0.214464	deprivation
J09-J18	2	1925	0.06656	0.186	0.1322	incidence	-0.12495	0.154212	deprivation
J09-J18	2	1925	0.06656	0.186	0.1322	impact	0.06105	0.203121	deprivation
J09-J18	2	1935	0.06656	0.186	0.1322	incidence	-0.04126	0.143542	deprivation
J09-J18	2	1935	0.06656	0.186	0.1322	impact	0.14474	0.195144	deprivation
J09-J18	2	1945	0.06656	0.186	0.1322	incidence	-0.243141	0.125339	deprivation
J09-J18	2	1945	0.06656	0.186	0.1322	impact	-0.057141	0.182172	deprivation
J09-J18	2	1955	0.06656	0.186	0.1322	incidence	-0.337499	0.0795	deprivation
J09-J18	2	1955	0.06656	0.186	0.1322	impact	-0.151499	0.154263	deprivation
J09-J18	3	1915	0.07515	0.0534	0.2479	incidence	-0.20366	0.158054	deprivation
J09-J18	3	1915	0.07515	0.0534	0.2479	impact	-0.15026	0.293999	deprivation
J09-J18	3	1925	0.07515	0.0534	0.2479	incidence	-0.15718	0.145229	deprivation
J09-J18	3	1925	0.07515	0.0534	0.2479	impact	-0.10378	0.287308	deprivation
J09-J18	3	1935	0.07515	0.0534	0.2479	incidence	-0.07526	0.135053	deprivation
J09-J18	3	1935	0.07515	0.0534	0.2479	impact	-0.02186	0.282301	deprivation
J09-J18	3	1945	0.07515	0.0534	0.2479	incidence	-0.125819	0.117494	deprivation
J09-J18	3	1945	0.07515	0.0534	0.2479	impact	-0.072419	0.274334	deprivation
J09-J18	3	1955	0.07515	0.0534	0.2479	incidence	-0.192171	0.0742	deprivation
J09-J18	3	1955	0.07515	0.0534	0.2479	impact	-0.138771	0.258766	deprivation
J09-J18	4	1915	0.07726	-0.0173	0.1405	incidence	-0.23646	0.152579	deprivation
J09-J18	4	1915	0.07726	-0.0173	0.1405	impact	-0.25376	0.207414	deprivation
J09-J18	4	1925	0.07726	-0.0173	0.1405	incidence	0.01704	0.139356	deprivation
J09-J18	4	1925	0.07726	-0.0173	0.1405	impact	-0.00026	0.19789	deprivation
J09-J18	4	1935	0.07726	-0.0173	0.1405	incidence	-0.11377	0.129942	deprivation
J09-J18	4	1935	0.07726	-0.0173	0.1405	impact	-0.13107	0.191377	deprivation
J09-J18	4	1945	0.07726	-0.0173	0.1405	incidence	-0.181218	0.113941	deprivation
J09-J18	4	1945	0.07726	-0.0173	0.1405	impact	-0.198518	0.180895	deprivation
J09-J18	4	1955	0.07726	-0.0173	0.1405	incidence	-0.205792	0.0725	deprivation
J09-J18	4	1955	0.07726	-0.0173	0.1405	impact	-0.223092	0.158103	deprivation
J09-J18	5	1915	0.0863	0.196	0.1213	incidence	-0.14255	0.144317	deprivation
J09-J18	5	1915	0.0863	0.196	0.1213	impact	0.05345	0.188524	deprivation
J09-J18	5	1925	0.0863	0.196	0.1213	incidence	-0.15324	0.131089	deprivation
J09-J18	5	1925	0.0863	0.196	0.1213	impact	0.04276	0.1786	deprivation
J09-J18	5	1935	0.0863	0.196	0.1213	incidence	-0.06779	0.121809	deprivation
J09-J18	5	1935	0.0863	0.196	0.1213	impact	0.12821	0.171904	deprivation
J09-J18	5	1945	0.0863	0.196	0.1213	incidence	-0.156126	0.10625	deprivation
J09-J18	5	1945	0.0863	0.196	0.1213	impact	0.039874	0.161254	deprivation
J09-J18	5	1955	0.0863	0.196	0.1213	incidence	-0.229254	0.0672	deprivation
J09-J18	5	1955	0.0863	0.196	0.1213	impact	-0.033254	0.138671	deprivation
J09-J18	6	1915	0.09347	0.321	0.1602	incidence	-0.23769	0.138306	deprivation
J09-J18	6	1915	0.09347	0.321	0.1602	impact	0.08331	0.211643	deprivation
J09-J18	6	1925	0.09347	0.321	0.1602	incidence	-0.09018	0.124163	deprivation
J09-J18	6	1925	0.09347	0.321	0.1602	impact	0.23082	0.202683	deprivation
J09-J18	6	1935	0.09347	0.321	0.1602	incidence	-0.11295	0.115021	deprivation
J09-J18	6	1935	0.09347	0.321	0.1602	impact	0.20805	0.197215	deprivation
J09-J18	6	1945	0.09347	0.321	0.1602	incidence	-0.205507	0.100017	deprivation
J09-J18	6	1945	0.09347	0.321	0.1602	impact	0.115493	0.188858	deprivation
J09-J18	6	1955	0.09347	0.321	0.1602	incidence	-0.154313	0.0631	deprivation
J09-J18	6	1955	0.09347	0.321	0.1602	impact	0.166687	0.172179	deprivation
J09-J18	7	1915	0.10779	0.191	0.0632	incidence	-0.14491	0.126255	deprivation
J09-J18	7	1915	0.10779	0.191	0.0632	impact	0.04609	0.14119	deprivation
J09-J18	7	1925	0.10779	0.191	0.0632	incidence	-0.08373	0.113202	deprivation
J09-J18	7	1925	0.10779	0.191	0.0632	impact	0.10727	0.129649	deprivation
J09-J18	7	1935	0.10779	0.191	0.0632	incidence	-0.17946	0.104621	deprivation
J09-J18	7	1935	0.10779	0.191	0.0632	impact	0.01154	0.122228	deprivation
J09-J18	7	1945	0.10779	0.191	0.0632	incidence	-0.184831	0.0912921	deprivation
J09-J18	7	1945	0.10779	0.191	0.0632	impact	0.006169	0.111034	deprivation
J09-J18	7	1955	0.10779	0.191	0.0632	incidence	-0.188179	0.058	deprivation
J09-J18	7	1955	0.10779	0.191	0.0632	impact	0.002821	0.0857802	deprivation
J09-J18	8	1915	0.11486	0.19	0.0861	incidence	-0.16189	0.122349	deprivation
J09-J18	8	1915	0.11486	0.19	0.0861	impact	0.02811	0.149608	deprivation
J09-J18	8	1925	0.11486	0.19	0.0861	incidence	-0.16481	0.108815	deprivation
J09-J18	8	1925	0.11486	0.19	0.0861	impact	0.02519	0.138759	deprivation
J09-J18	8	1935	0.11486	0.19	0.0861	incidence	-0.09828	0.100652	deprivation
J09-J18	8	1935	0.11486	0.19	0.0861	impact	0.09172	0.132454	deprivation
J09-J18	8	1945	0.11486	0.19	0.0861	incidence	-0.173728	0.0879501	deprivation
J09-J18	8	1945	0.11486	0.19	0.0861	impact	0.016272	0.123079	deprivation
J09-J18	8	1955	0.11486	0.19	0.0861	incidence	-0.263072	0.0559	deprivation
J09-J18	8	1955	0.11486	0.19	0.0861	impact	-0.073072	0.102655	deprivation
J09-J18	9	1915	0.11924	0.106	0.1007	incidence	-0.25883	0.119126	deprivation
J09-J18	9	1915	0.11924	0.106	0.1007	impact	-0.15283	0.155985	deprivation
J09-J18	9	1925	0.11924	0.106	0.1007	incidence	-0.16269	0.104026	deprivation
J09-J18	9	1925	0.11924	0.106	0.1007	impact	-0.05669	0.144782	deprivation
J09-J18	9	1935	0.11924	0.106	0.1007	incidence	-0.21843	0.09556	deprivation
J09-J18	9	1935	0.11924	0.106	0.1007	impact	-0.11243	0.138824	deprivation
J09-J18	9	1945	0.11924	0.106	0.1007	incidence	-0.217941	0.0829617	deprivation
J09-J18	9	1945	0.11924	0.106	0.1007	impact	-0.111941	0.130473	deprivation
J09-J18	9	1955	0.11924	0.106	0.1007	incidence	-0.173989	0.0523	deprivation
J09-J18	9	1955	0.11924	0.106	0.1007	impact	-0.067989	0.113471	deprivation
J09-J18	10	1915	0.12938	0.2	0.0684	incidence	-0.1645	0.114229	deprivation
J09-J18	10	1915	0.12938	0.2	0.0684	impact	0.0355	0.133143	deprivation
J09-J18	10	1925	0.12938	0.2	0.0684	incidence	-0.26477	0.097477	deprivation
J09-J18	10	1925	0.12938	0.2	0.0684	impact	-0.06477	0.119081	deprivation
J09-J18	10	1935	0.12938	0.2	0.0684	incidence	-0.13044	0.088229	deprivation
J09-J18	10	1935	0.12938	0.2	0.0684	impact	0.06956	0.111637	deprivation
J09-J18	10	1945	0.12938	0.2	0.0684	incidence	-0.183303	0.075682	deprivation
J09-J18	10	1945	0.12938	0.2	0.0684	impact	0.016697	0.102011	deprivation
J09-J18	10	1955	0.12938	0.2	0.0684	incidence	-0.196577	0.0474	deprivation
J09-J18	10	1955	0.12938	0.2	0.0684	impact	0.003423	0.0832185	deprivation
R00-R09	1	1915	0.05824	0.182	0.1512	incidence	0.02092	0.117568	deprivation
R00-R09	1	1915	0.05824	0.182	0.1512	impact	0.20292	0.19153	deprivation
R00-R09	1	1925	0.05824	0.182	0.1512	incidence	0.10596	0.0876797	deprivation
R00-R09	1	1925	0.05824	0.182	0.1512	impact	0.28796	0.174783	deprivation
R00-R09	1	1935	0.05824	0.182	0.1512	incidence	0.14444	0.0730707	deprivation
R00-R09	1	1935	0.05824	0.182	0.1512	impact	0.32644	0.167931	deprivation
R00-R09	1	1945	0.05824	0.182	0.1512	incidence	0.276299	0.05836	deprivation
R00-R09	1	1945	0.05824	0.182	0.1512	impact	0.458299	0.162072	deprivation
R00-R09	1	1955	0.05824	0.182	0.1512	incidence	0.052211	0.035	deprivation
R00-R09	1	1955	0.05824	0.182	0.1512	impact	0.234211	0.155198	deprivation
R00-R09	2	1915	0.06563	0.24	0.1145	incidence	-0.12135	0.113465	deprivation
R00-R09	2	1915	0.06563	0.24	0.1145	impact	0.11865	0.161197	deprivation
R00-R09	2	1925	0.06563	0.24	0.1145	incidence	0.08422	0.0808575	deprivation
R00-R09	2	1925	0.06563	0.24	0.1145	impact	0.32422	0.140172	deprivation
R00-R09	2	1935	0.06563	0.24	0.1145	incidence	0.21745	0.0661104	deprivation
R00-R09	2	1935	0.06563	0.24	0.1145	impact	0.45745	0.132215	deprivation
R00-R09	2	1945	0.06563	0.24	0.1145	incidence	0.183291	0.0518414	deprivation
R00-R09	2	1945	0.06563	0.24	0.1145	impact	0.423291	0.125689	deprivation
R00-R09	2	1955	0.06563	0.24	0.1145	incidence	0.100679	0.0308	deprivation
R00-R09	2	1955	0.06563	0.24	0.1145	impact	0.340679	0.11857	deprivation
R00-R09	3	1915	0.06941	0.24	0.1174	incidence	0.00995	0.109062	deprivation
R00-R09	3	1915	0.06941	0.24	0.1174	impact	0.24995	0.160241	deprivation
R00-R09	3	1925	0.06941	0.24	0.1174	incidence	0.10814	0.0800999	deprivation
R00-R09	3	1925	0.06941	0.24	0.1174	impact	0.34814	0.142122	deprivation
R00-R09	3	1935	0.06941	0.24	0.1174	incidence	0.20023	0.0662861	deprivation
R00-R09	3	1935	0.06941	0.24	0.1174	impact	0.44023	0.134821	deprivation
R00-R09	3	1945	0.06941	0.24	0.1174	incidence	0.191618	0.0524605	deprivation
R00-R09	3	1945	0.06941	0.24	0.1174	impact	0.431618	0.128588	deprivation
R00-R09	3	1955	0.06941	0.24	0.1174	incidence	0.072652	0.0313	deprivation
R00-R09	3	1955	0.06941	0.24	0.1174	impact	0.312652	0.121501	deprivation
R00-R09	4	1915	0.07076	0.279	0.0989	incidence	-0.06407	0.109389	deprivation
R00-R09	4	1915	0.07076	0.279	0.0989	impact	0.21493	0.14747	deprivation
R00-R09	4	1925	0.07076	0.279	0.0989	incidence	0.0683	0.0796775	deprivation
R00-R09	4	1925	0.07076	0.279	0.0989	impact	0.3473	0.127003	deprivation
R00-R09	4	1935	0.07076	0.279	0.0989	incidence	0.18082	0.0659274	deprivation
R00-R09	4	1935	0.07076	0.279	0.0989	impact	0.45982	0.11886	deprivation
R00-R09	4	1945	0.07076	0.279	0.0989	incidence	0.222224	0.0521211	deprivation
R00-R09	4	1945	0.07076	0.279	0.0989	impact	0.501224	0.111794	deprivation
R00-R09	4	1955	0.07076	0.279	0.0989	incidence	0.069536	0.031	deprivation
R00-R09	4	1955	0.07076	0.279	0.0989	impact	0.348536	0.103645	deprivation
R00-R09	5	1915	0.07736	0.0266	0.0866	incidence	0.02566	0.103376	deprivation
R00-R09	5	1915	0.07736	0.0266	0.0866	impact	0.05226	0.134856	deprivation
R00-R09	5	1925	0.07736	0.0266	0.0866	incidence	0.07666	0.0762336	deprivation
R00-R09	5	1925	0.07736	0.0266	0.0866	impact	0.10326	0.115374	deprivation
R00-R09	5	1935	0.07736	0.0266	0.0866	incidence	0.17937	0.0635072	deprivation
R00-R09	5	1935	0.07736	0.0266	0.0866	impact	0.20597	0.107391	deprivation
R00-R09	5	1945	0.07736	0.0266	0.0866	incidence	0.241856	0.0502016	deprivation
R00-R09	5	1945	0.07736	0.0266	0.0866	impact	0.268456	0.100099	deprivation
R00-R09	5	1955	0.07736	0.0266	0.0866	incidence	0.044334	0.0298	deprivation
R00-R09	5	1955	0.07736	0.0266	0.0866	impact	0.070934	0.0915838	deprivation
R00-R09	6	1915	0.08497	0.22	0.0933	incidence	0.00207	0.103653	deprivation
R00-R09	6	1915	0.08497	0.22	0.0933	impact	0.22207	0.139459	deprivation
R00-R09	6	1925	0.08497	0.22	0.0933	incidence	0.09594	0.0730475	deprivation
R00-R09	6	1925	0.08497	0.22	0.0933	impact	0.31594	0.118494	deprivation
R00-R09	6	1935	0.08497	0.22	0.0933	incidence	0.21254	0.0598973	deprivation
R00-R09	6	1935	0.08497	0.22	0.0933	impact	0.43254	0.110872	deprivation
R00-R09	6	1945	0.08497	0.22	0.0933	incidence	0.228018	0.0472611	deprivation
R00-R09	6	1945	0.08497	0.22	0.0933	impact	0.448018	0.104587	deprivation
R00-R09	6	1955	0.08497	0.22	0.0933	incidence	0.091182	0.0281	deprivation
R00-R09	6	1955	0.08497	0.22	0.0933	impact	0.311182	0.0974397	deprivation
R00-R09	7	1915	0.094	0.19	0.0637	incidence	0.00292	0.0979136	deprivation
R00-R09	7	1915	0.094	0.19	0.0637	impact	0.19292	0.116811	deprivation
R00-R09	7	1925	0.094	0.19	0.0637	incidence	0.1214	0.0688471	deprivation
R00-R09	7	1925	0.094	0.19	0.0637	impact	0.3114	0.0937956	deprivation
R00-R09	7	1935	0.094	0.19	0.0637	incidence	0.20566	0.0564919	deprivation
R00-R09	7	1935	0.094	0.19	0.0637	impact	0.39566	0.0851412	deprivation
R00-R09	7	1945	0.094	0.19	0.0637	incidence	0.265992	0.0445409	deprivation
R00-R09	7	1945	0.094	0.19	0.0637	impact	0.455992	0.0777276	deprivation
R00-R09	7	1955	0.094	0.19	0.0637	incidence	0.207888	0.0265	deprivation
R00-R09	7	1955	0.094	0.19	0.0637	impact	0.397888	0.0689923	deprivation
R00-R09	8	1915	0.09576	0.295	0.0714	incidence	-0.04213	0.0948507	deprivation
R00-R09	8	1915	0.09576	0.295	0.0714	impact	0.25287	0.118721	deprivation
R00-R09	8	1925	0.09576	0.295	0.0714	incidence	0.07058	0.0655964	deprivation
R00-R09	8	1925	0.09576	0.295	0.0714	impact	0.36558	0.096958	deprivation
R00-R09	8	1935	0.09576	0.295	0.0714	incidence	0.1935	0.0537128	deprivation
R00-R09	8	1935	0.09576	0.295	0.0714	impact	0.4885	0.0893477	deprivation
R00-R09	8	1945	0.09576	0.295	0.0714	incidence	0.302638	0.0423417	deprivation
R00-R09	8	1945	0.09576	0.295	0.0714	impact	0.597638	0.0830107	deprivation
R00-R09	8	1955	0.09576	0.295	0.0714	incidence	0.169582	0.0251	deprivation
R00-R09	8	1955	0.09576	0.295	0.0714	impact	0.464582	0.0756834	deprivation
R00-R09	9	1915	0.10204	0.189	0.0585	incidence	-0.19682	0.0982008	deprivation
R00-R09	9	1915	0.10204	0.189	0.0585	impact	-0.00782	0.114305	deprivation
R00-R09	9	1925	0.10204	0.189	0.0585	incidence	0.10251	0.0644376	deprivation
R00-R09	9	1925	0.10204	0.189	0.0585	impact	0.29151	0.0870313	deprivation
R00-R09	9	1935	0.10204	0.189	0.0585	incidence	0.22646	0.0519755	deprivation
R00-R09	9	1935	0.10204	0.189	0.0585	impact	0.41546	0.0782541	deprivation
R00-R09	9	1945	0.10204	0.189	0.0585	incidence	0.28041	0.0403268	deprivation
R00-R09	9	1945	0.10204	0.189	0.0585	impact	0.46941	0.0710528	deprivation
R00-R09	9	1955	0.10204	0.189	0.0585	incidence	0.21841	0.0236	deprivation
R00-R09	9	1955	0.10204	0.189	0.0585	impact	0.40741	0.063081	deprivation
R00-R09	10	1915	0.11344	0.344	0.0891	incidence	-0.11833	0.0984939	deprivation
R00-R09	10	1915	0.11344	0.344	0.0891	impact	0.22567	0.132815	deprivation
R00-R09	10	1925	0.11344	0.344	0.0891	incidence	0.04859	0.0634289	deprivation
R00-R09	10	1925	0.11344	0.344	0.0891	impact	0.39259	0.109371	deprivation
R00-R09	10	1935	0.11344	0.344	0.0891	incidence	0.24401	0.0498038	deprivation
R00-R09	10	1935	0.11344	0.344	0.0891	impact	0.58801	0.102075	deprivation
R00-R09	10	1945	0.11344	0.344	0.0891	incidence	0.295551	0.0380371	deprivation
R00-R09	10	1945	0.11344	0.344	0.0891	impact	0.639551	0.0968795	deprivation
R00-R09	10	1955	0.11344	0.344	0.0891	incidence	0.223149	0.0219	deprivation
R00-R09	10	1955	0.11344	0.344	0.0891	impact	0.567149	0.0917519	deprivation
C30-C39	1	1915	0.04823	0.218	0.226	incidence	-0.36311	0.303658	deprivation
C30-C39	1	1915	0.04823	0.218	0.226	impact	-0.14511	0.378529	deprivation
C30-C39	1	1925	0.04823	0.218	0.226	incidence	0.27449	0.237444	deprivation
C30-C39	1	1925	0.04823	0.218	0.226	impact	0.49249	0.327804	deprivation
C30-C39	1	1935	0.04823	0.218	0.226	incidence	0.25447	0.219624	deprivation
C30-C39	1	1935	0.04823	0.218	0.226	impact	0.47247	0.315136	deprivation
C30-C39	1	1945	0.04823	0.218	0.226	incidence	0.473859	0.199057	deprivation
C30-C39	1	1945	0.04823	0.218	0.226	impact	0.691859	0.301164	deprivation
C30-C39	1	1955	0.04823	0.218	0.226	incidence	0.226781	0.1312	deprivation
C30-C39	1	1955	0.04823	0.218	0.226	impact	0.444781	0.261322	deprivation
C30-C39	2	1915	0.05585	0.154	0.1857	incidence	-0.16222	0.28762	deprivation
C30-C39	2	1915	0.05585	0.154	0.1857	impact	-0.00822	0.342359	deprivation
C30-C39	2	1925	0.05585	0.154	0.1857	incidence	0.11578	0.207024	deprivation
C30-C39	2	1925	0.05585	0.154	0.1857	impact	0.26978	0.278107	deprivation
C30-C39	2	1935	0.05585	0.154	0.1857	incidence	0.36382	0.186924	deprivation
C30-C39	2	1935	0.05585	0.154	0.1857	impact	0.51782	0.263486	deprivation
C30-C39	2	1945	0.05585	0.154	0.1857	incidence	0.351074	0.167684	deprivation
C30-C39	2	1945	0.05585	0.154	0.1857	impact	0.505074	0.250204	deprivation
C30-C39	2	1955	0.05585	0.154	0.1857	incidence	0.454386	0.1103	deprivation
C30-C39	2	1955	0.05585	0.154	0.1857	impact	0.608386	0.215987	deprivation
C30-C39	3	1915	0.0601	0.342	0.1827	incidence	-0.13592	0.26939	deprivation
C30-C39	3	1915	0.0601	0.342	0.1827	impact	0.20608	0.3255	deprivation
C30-C39	3	1925	0.0601	0.342	0.1827	incidence	0.20359	0.200942	deprivation
C30-C39	3	1925	0.0601	0.342	0.1827	impact	0.54559	0.271583	deprivation
C30-C39	3	1935	0.0601	0.342	0.1827	incidence	0.26622	0.182808	deprivation
C30-C39	3	1935	0.0601	0.342	0.1827	impact	0.60822	0.258453	deprivation
C30-C39	3	1945	0.0601	0.342	0.1827	incidence	0.52238	0.163687	deprivation
C30-C39	3	1945	0.0601	0.342	0.1827	impact	0.86438	0.245301	deprivation
C30-C39	3	1955	0.0601	0.342	0.1827	incidence	0.50519	0.1072	deprivation
C30-C39	3	1955	0.0601	0.342	0.1827	impact	0.84719	0.211828	deprivation
C30-C39	4	1915	0.06682	0.387	0.2018	incidence	-0.36573	0.272767	deprivation
C30-C39	4	1915	0.06682	0.387	0.2018	impact	0.02127	0.339301	deprivation
C30-C39	4	1925	0.06682	0.387	0.2018	incidence	0.14385	0.191904	deprivation
C30-C39	4	1925	0.06682	0.387	0.2018	impact	0.53085	0.278479	deprivation
C30-C39	4	1935	0.06682	0.387	0.2018	incidence	0.36827	0.174782	deprivation
C30-C39	4	1935	0.06682	0.387	0.2018	impact	0.75527	0.266968	deprivation
C30-C39	4	1945	0.06682	0.387	0.2018	incidence	0.405984	0.158419	deprivation
C30-C39	4	1945	0.06682	0.387	0.2018	impact	0.792984	0.256554	deprivation
C30-C39	4	1955	0.06682	0.387	0.2018	incidence	0.772006	0.1048	deprivation
C30-C39	4	1955	0.06682	0.387	0.2018	impact	1.15901	0.22739	deprivation
C30-C39	5	1915	0.07719	0.116	0.1521	incidence	0.15615	0.246265	deprivation
C30-C39	5	1915	0.07719	0.116	0.1521	impact	0.27215	0.289449	deprivation
C30-C39	5	1925	0.07719	0.116	0.1521	incidence	0.17237	0.177454	deprivation
C30-C39	5	1925	0.07719	0.116	0.1521	impact	0.28837	0.233719	deprivation
C30-C39	5	1935	0.07719	0.116	0.1521	incidence	0.30958	0.161487	deprivation
C30-C39	5	1935	0.07719	0.116	0.1521	impact	0.42558	0.221839	deprivation
C30-C39	5	1945	0.07719	0.116	0.1521	incidence	0.369006	0.145765	deprivation
C30-C39	5	1945	0.07719	0.116	0.1521	impact	0.485006	0.21067	deprivation
C30-C39	5	1955	0.07719	0.116	0.1521	incidence	0.455934	0.0961	deprivation
C30-C39	5	1955	0.07719	0.116	0.1521	impact	0.571934	0.179916	deprivation
C30-C39	6	1915	0.08462	0.339	0.1115	incidence	-0.37247	0.250307	deprivation
C30-C39	6	1915	0.08462	0.339	0.1115	impact	-0.03347	0.274018	deprivation
C30-C39	6	1925	0.08462	0.339	0.1115	incidence	0.07421	0.171701	deprivation
C30-C39	6	1925	0.08462	0.339	0.1115	impact	0.41321	0.204728	deprivation
C30-C39	6	1935	0.08462	0.339	0.1115	incidence	0.33879	0.15708	deprivation
C30-C39	6	1935	0.08462	0.339	0.1115	impact	0.67779	0.19263	deprivation
C30-C39	6	1945	0.08462	0.339	0.1115	incidence	0.400848	0.14322	deprivation
C30-C39	6	1945	0.08462	0.339	0.1115	impact	0.739848	0.181506	deprivation
C30-C39	6	1955	0.08462	0.339	0.1115	incidence	0.611222	0.0952	deprivation
C30-C39	6	1955	0.08462	0.339	0.1115	impact	0.950222	0.146613	deprivation
C30-C39	7	1915	0.09461	-0.11	0.1279	incidence	-0.37855	0.230299	deprivation
C30-C39	7	1915	0.09461	-0.11	0.1279	impact	-0.48855	0.263431	deprivation
C30-C39	7	1925	0.09461	-0.11	0.1279	incidence	0.13657	0.156509	deprivation
C30-C39	7	1925	0.09461	-0.11	0.1279	impact	0.02657	0.202122	deprivation
C30-C39	7	1935	0.09461	-0.11	0.1279	incidence	0.27056	0.142439	deprivation
C30-C39	7	1935	0.09461	-0.11	0.1279	impact	0.16056	0.191435	deprivation
C30-C39	7	1945	0.09461	-0.11	0.1279	incidence	0.391158	0.12936	deprivation
C30-C39	7	1945	0.09461	-0.11	0.1279	impact	0.281158	0.181913	deprivation
C30-C39	7	1955	0.09461	-0.11	0.1279	incidence	0.426712	0.0857	deprivation
C30-C39	7	1955	0.09461	-0.11	0.1279	impact	0.316712	0.153957	deprivation
C30-C39	8	1915	0.10066	0.224	0.1223	incidence	-0.03347	0.208709	deprivation
C30-C39	8	1915	0.10066	0.224	0.1223	impact	0.19053	0.241902	deprivation
C30-C39	8	1925	0.10066	0.224	0.1223	incidence	0.1025	0.146468	deprivation
C30-C39	8	1925	0.10066	0.224	0.1223	impact	0.3265	0.190814	deprivation
C30-C39	8	1935	0.10066	0.224	0.1223	incidence	0.29439	0.132824	deprivation
C30-C39	8	1935	0.10066	0.224	0.1223	impact	0.51839	0.180554	deprivation
C30-C39	8	1945	0.10066	0.224	0.1223	incidence	0.395962	0.120234	deprivation
C30-C39	8	1945	0.10066	0.224	0.1223	impact	0.619962	0.171504	deprivation
C30-C39	8	1955	0.10066	0.224	0.1223	incidence	0.421288	0.0795	deprivation
C30-C39	8	1955	0.10066	0.224	0.1223	impact	0.645288	0.145868	deprivation
C30-C39	9	1915	0.11459	0.26	0.1417	incidence	-0.52792	0.213189	deprivation
C30-C39	9	1915	0.11459	0.26	0.1417	impact	-0.26792	0.255985	deprivation
C30-C39	9	1925	0.11459	0.26	0.1417	incidence	0.10558	0.134411	deprivation
C30-C39	9	1925	0.11459	0.26	0.1417	impact	0.36558	0.195308	deprivation
C30-C39	9	1935	0.11459	0.26	0.1417	incidence	0.20351	0.120463	deprivation
C30-C39	9	1935	0.11459	0.26	0.1417	impact	0.46351	0.185985	deprivation
C30-C39	9	1945	0.11459	0.26	0.1417	incidence	0.294619	0.108079	deprivation
C30-C39	9	1945	0.11459	0.26	0.1417	impact	0.554619	0.178214	deprivation
C30-C39	9	1955	0.11459	0.26	0.1417	incidence	0.420801	0.0711	deprivation
C30-C39	9	1955	0.11459	0.26	0.1417	impact	0.680801	0.158537	deprivation
C30-C39	10	1915	0.13172	0.189	0.1183	incidence	-0.3745	0.201561	deprivation
C30-C39	10	1915	0.13172	0.189	0.1183	impact	-0.1855	0.233713	deprivation
C30-C39	10	1925	0.13172	0.189	0.1183	incidence	-0.05072	0.122982	deprivation
C30-C39	10	1925	0.13172	0.189	0.1183	impact	0.13828	0.170644	deprivation
C30-C39	10	1935	0.13172	0.189	0.1183	incidence	0.18749	0.107043	deprivation
C30-C39	10	1935	0.13172	0.189	0.1183	impact	0.37649	0.15954	deprivation
C30-C39	10	1945	0.13172	0.189	0.1183	incidence	0.268954	0.0948095	deprivation
C30-C39	10	1945	0.13172	0.189	0.1183	impact	0.457954	0.151604	deprivation
C30-C39	10	1955	0.13172	0.189	0.1183	incidence	0.414586	0.0618	deprivation
C30-C39	10	1955	0.13172	0.189	0.1183	impact	0.603586	0.13347	deprivation
R10-R19	1	1915	0.06568	0.327	0.1147	incidence	0.20386	0.137079	deprivation
R10-R19	1	1915	0.06568	0.327	0.1147	impact	0.53086	0.178737	deprivation
R10-R19	1	1925	0.06568	0.327	0.1147	incidence	0.15831	0.0999538	deprivation
R10-R19	1	1925	0.06568	0.327	0.1147	impact	0.48531	0.152141	deprivation
R10-R19	1	1935	0.06568	0.327	0.1147	incidence	0.09563	0.0812446	deprivation
R10-R19	1	1935	0.06568	0.327	0.1147	impact	0.42263	0.140559	deprivation
R10-R19	1	1945	0.06568	0.327	0.1147	incidence	0.120298	0.0638411	deprivation
R10-R19	1	1945	0.06568	0.327	0.1147	impact	0.447298	0.13127	deprivation
R10-R19	1	1955	0.06568	0.327	0.1147	incidence	-0.050158	0.038	deprivation
R10-R19	1	1955	0.06568	0.327	0.1147	impact	0.276842	0.120831	deprivation
R10-R19	2	1915	0.07283	-0.0707	0.0794	incidence	0.22686	0.130162	deprivation
R10-R19	2	1915	0.07283	-0.0707	0.0794	impact	0.15616	0.152468	deprivation
R10-R19	2	1925	0.07283	-0.0707	0.0794	incidence	0.17429	0.0919557	deprivation
R10-R19	2	1925	0.07283	-0.0707	0.0794	impact	0.10359	0.121492	deprivation
R10-R19	2	1935	0.07283	-0.0707	0.0794	incidence	0.10994	0.0737922	deprivation
R10-R19	2	1935	0.07283	-0.0707	0.0794	impact	0.03924	0.108396	deprivation
R10-R19	2	1945	0.07283	-0.0707	0.0794	incidence	0.118018	0.0570236	deprivation
R10-R19	2	1945	0.07283	-0.0707	0.0794	impact	0.047318	0.0977551	deprivation
R10-R19	2	1955	0.07283	-0.0707	0.0794	incidence	0.016632	0.0337	deprivation
R10-R19	2	1955	0.07283	-0.0707	0.0794	impact	-0.054068	0.0862557	deprivation
R10-R19	3	1915	0.07177	-0.0812	0.1762	incidence	0.09969	0.125296	deprivation
R10-R19	3	1915	0.07177	-0.0812	0.1762	impact	0.01849	0.216207	deprivation
R10-R19	3	1925	0.07177	-0.0812	0.1762	incidence	0.17384	0.0920869	deprivation
R10-R19	3	1925	0.07177	-0.0812	0.1762	impact	0.09264	0.198813	deprivation
R10-R19	3	1935	0.07177	-0.0812	0.1762	incidence	0.19065	0.0749637	deprivation
R10-R19	3	1935	0.07177	-0.0812	0.1762	impact	0.10945	0.191484	deprivation
R10-R19	3	1945	0.07177	-0.0812	0.1762	incidence	0.137405	0.0580673	deprivation
R10-R19	3	1945	0.07177	-0.0812	0.1762	impact	0.056205	0.185522	deprivation
R10-R19	3	1955	0.07177	-0.0812	0.1762	incidence	0.081915	0.0341	deprivation
R10-R19	3	1955	0.07177	-0.0812	0.1762	impact	0.000715	0.179469	deprivation
R10-R19	4	1915	0.07134	0.171	0.0898	incidence	0.18718	0.125003	deprivation
R10-R19	4	1915	0.07134	0.171	0.0898	impact	0.35818	0.153915	deprivation
R10-R19	4	1925	0.07134	0.171	0.0898	incidence	0.20175	0.0904339	deprivation
R10-R19	4	1925	0.07134	0.171	0.0898	impact	0.37275	0.127445	deprivation
R10-R19	4	1935	0.07134	0.171	0.0898	incidence	0.2461	0.0740122	deprivation
R10-R19	4	1935	0.07134	0.171	0.0898	impact	0.4171	0.116369	deprivation
R10-R19	4	1945	0.07134	0.171	0.0898	incidence	0.144978	0.0579217	deprivation
R10-R19	4	1945	0.07134	0.171	0.0898	impact	0.315978	0.10686	deprivation
R10-R19	4	1955	0.07134	0.171	0.0898	incidence	0.054972	0.0344	deprivation
R10-R19	4	1955	0.07134	0.171	0.0898	impact	0.225972	0.0961634	deprivation
R10-R19	5	1915	0.07757	0.0212	0.0662	incidence	0.13867	0.119927	deprivation
R10-R19	5	1915	0.07757	0.0212	0.0662	impact	0.15987	0.136985	deprivation
R10-R19	5	1925	0.07757	0.0212	0.0662	incidence	0.09192	0.0864019	deprivation
R10-R19	5	1925	0.07757	0.0212	0.0662	impact	0.11312	0.108847	deprivation
R10-R19	5	1935	0.07757	0.0212	0.0662	incidence	0.21039	0.0705294	deprivation
R10-R19	5	1935	0.07757	0.0212	0.0662	impact	0.23159	0.0967308	deprivation
R10-R19	5	1945	0.07757	0.0212	0.0662	incidence	0.195739	0.0550828	deprivation
R10-R19	5	1945	0.07757	0.0212	0.0662	impact	0.216939	0.0861195	deprivation
R10-R19	5	1955	0.07757	0.0212	0.0662	incidence	0.050801	0.0326	deprivation
R10-R19	5	1955	0.07757	0.0212	0.0662	impact	0.072001	0.0737916	deprivation
R10-R19	6	1915	0.08707	0.152	0.1132	incidence	0.30937	0.113853	deprivation
R10-R19	6	1915	0.08707	0.152	0.1132	impact	0.46137	0.160551	deprivation
R10-R19	6	1925	0.08707	0.152	0.1132	incidence	0.2395	0.0819481	deprivation
R10-R19	6	1925	0.08707	0.152	0.1132	impact	0.3915	0.139749	deprivation
R10-R19	6	1935	0.08707	0.152	0.1132	incidence	0.20023	0.0668138	deprivation
R10-R19	6	1935	0.08707	0.152	0.1132	impact	0.35223	0.131447	deprivation
R10-R19	6	1945	0.08707	0.152	0.1132	incidence	0.160791	0.0523626	deprivation
R10-R19	6	1945	0.08707	0.152	0.1132	impact	0.312791	0.124724	deprivation
R10-R19	6	1955	0.08707	0.152	0.1132	incidence	0.085889	0.031	deprivation
R10-R19	6	1955	0.08707	0.152	0.1132	impact	0.237889	0.117368	deprivation
R10-R19	7	1915	0.08726	0.148	0.0699	incidence	0.19817	0.111634	deprivation
R10-R19	7	1915	0.08726	0.148	0.0699	impact	0.34617	0.131712	deprivation
R10-R19	7	1925	0.08726	0.148	0.0699	incidence	0.17451	0.0795277	deprivation
R10-R19	7	1925	0.08726	0.148	0.0699	impact	0.32251	0.10588	deprivation
R10-R19	7	1935	0.08726	0.148	0.0699	incidence	0.17351	0.0650195	deprivation
R10-R19	7	1935	0.08726	0.148	0.0699	impact	0.32151	0.0954649	deprivation
R10-R19	7	1945	0.08726	0.148	0.0699	incidence	0.127333	0.051024	deprivation
R10-R19	7	1945	0.08726	0.148	0.0699	impact	0.275333	0.0865417	deprivation
R10-R19	7	1955	0.08726	0.148	0.0699	incidence	0.077947	0.0301	deprivation
R10-R19	7	1955	0.08726	0.148	0.0699	impact	0.225947	0.0761053	deprivation
R10-R19	8	1915	0.09335	0.158	0.1092	incidence	0.16015	0.110176	deprivation
R10-R19	8	1915	0.09335	0.158	0.1092	impact	0.31815	0.155124	deprivation
R10-R19	8	1925	0.09335	0.158	0.1092	incidence	0.23288	0.0767918	deprivation
R10-R19	8	1925	0.09335	0.158	0.1092	impact	0.39088	0.133498	deprivation
R10-R19	8	1935	0.09335	0.158	0.1092	incidence	0.20888	0.0623318	deprivation
R10-R19	8	1935	0.09335	0.158	0.1092	impact	0.36688	0.125737	deprivation
R10-R19	8	1945	0.09335	0.158	0.1092	incidence	0.129992	0.0487447	deprivation
R10-R19	8	1945	0.09335	0.158	0.1092	impact	0.287992	0.119585	deprivation
R10-R19	8	1955	0.09335	0.158	0.1092	incidence	0.081818	0.0287	deprivation
R10-R19	8	1955	0.09335	0.158	0.1092	impact	0.239818	0.112909	deprivation
R10-R19	9	1915	0.09705	0.0947	0.1415	incidence	-0.00856	0.111778	deprivation
R10-R19	9	1915	0.09705	0.0947	0.1415	impact	0.08614	0.180323	deprivation
R10-R19	9	1925	0.09705	0.0947	0.1415	incidence	0.14075	0.075604	deprivation
R10-R19	9	1925	0.09705	0.0947	0.1415	impact	0.23545	0.160431	deprivation
R10-R19	9	1935	0.09705	0.0947	0.1415	incidence	0.17524	0.0610026	deprivation
R10-R19	9	1935	0.09705	0.0947	0.1415	impact	0.26994	0.154089	deprivation
R10-R19	9	1945	0.09705	0.0947	0.1415	incidence	0.129073	0.0473482	deprivation
R10-R19	9	1945	0.09705	0.0947	0.1415	impact	0.223773	0.149212	deprivation
R10-R19	9	1955	0.09705	0.0947	0.1415	incidence	0.086667	0.0277	deprivation
R10-R19	9	1955	0.09705	0.0947	0.1415	impact	0.181367	0.144186	deprivation
R10-R19	10	1915	0.10533	0.163	0.0842	incidence	0.11311	0.114151	deprivation
R10-R19	10	1915	0.10533	0.163	0.0842	impact	0.27611	0.141845	deprivation
R10-R19	10	1925	0.10533	0.163	0.0842	incidence	0.1499	0.0749709	deprivation
R10-R19	10	1925	0.10533	0.163	0.0842	impact	0.3129	0.11274	deprivation
R10-R19	10	1935	0.10533	0.163	0.0842	incidence	0.13599	0.0588463	deprivation
R10-R19	10	1935	0.10533	0.163	0.0842	impact	0.29899	0.102726	deprivation
R10-R19	10	1945	0.10533	0.163	0.0842	incidence	0.165848	0.0449188	deprivation
R10-R19	10	1945	0.10533	0.163	0.0842	impact	0.328848	0.0954324	deprivation
R10-R19	10	1955	0.10533	0.163	0.0842	incidence	0.094942	0.0259	deprivation
R10-R19	10	1955	0.10533	0.163	0.0842	impact	0.257942	0.0880934	deprivation
R50-R69	1	1915	0.05948	0.0606	0.1279	incidence	0.0698	0.13079	deprivation
R50-R69	1	1915	0.05948	0.0606	0.1279	impact	0.1304	0.182933	deprivation
R50-R69	1	1925	0.05948	0.0606	0.1279	incidence	0.33378	0.117169	deprivation
R50-R69	1	1925	0.05948	0.0606	0.1279	impact	0.39438	0.173456	deprivation
R50-R69	1	1935	0.05948	0.0606	0.1279	incidence	0.16848	0.106954	deprivation
R50-R69	1	1935	0.05948	0.0606	0.1279	impact	0.22908	0.166726	deprivation
R50-R69	1	1945	0.05948	0.0606	0.1279	incidence	0.032505	0.0894634	deprivation
R50-R69	1	1945	0.05948	0.0606	0.1279	impact	0.093105	0.156084	deprivation
R50-R69	1	1955	0.05948	0.0606	0.1279	incidence	-0.078705	0.0543	deprivation
R50-R69	1	1955	0.05948	0.0606	0.1279	impact	-0.018105	0.138949	deprivation
R50-R69	2	1915	0.06175	-0.126	0.1108	incidence	0.09048	0.122882	deprivation
R50-R69	2	1915	0.06175	-0.126	0.1108	impact	-0.03552	0.165459	deprivation
R50-R69	2	1925	0.06175	-0.126	0.1108	incidence	0.24078	0.108135	deprivation
R50-R69	2	1925	0.06175	-0.126	0.1108	impact	0.11478	0.154822	deprivation
R50-R69	2	1935	0.06175	-0.126	0.1108	incidence	0.15178	0.0975718	deprivation
R50-R69	2	1935	0.06175	-0.126	0.1108	impact	0.02578	0.147638	deprivation
R50-R69	2	1945	0.06175	-0.126	0.1108	incidence	0.097603	0.0810432	deprivation
R50-R69	2	1945	0.06175	-0.126	0.1108	impact	-0.028397	0.137276	deprivation
R50-R69	2	1955	0.06175	-0.126	0.1108	incidence	-0.070783	0.0492	deprivation
R50-R69	2	1955	0.06175	-0.126	0.1108	impact	-0.196783	0.121232	deprivation
R50-R69	3	1915	0.06402	-0.158	0.0825	incidence	-0.02635	0.119355	deprivation
R50-R69	3	1915	0.06402	-0.158	0.0825	impact	-0.18435	0.145093	deprivation
R50-R69	3	1925	0.06402	-0.158	0.0825	incidence	0.26404	0.105795	deprivation
R50-R69	3	1925	0.06402	-0.158	0.0825	impact	0.10604	0.13416	deprivation
R50-R69	3	1935	0.06402	-0.158	0.0825	incidence	0.17384	0.0956529	deprivation
R50-R69	3	1935	0.06402	-0.158	0.0825	impact	0.01584	0.126316	deprivation
R50-R69	3	1945	0.06402	-0.158	0.0825	incidence	0.023281	0.079604	deprivation
R50-R69	3	1945	0.06402	-0.158	0.0825	impact	-0.134719	0.114643	deprivation
R50-R69	3	1955	0.06402	-0.158	0.0825	incidence	-0.024391	0.0484	deprivation
R50-R69	3	1955	0.06402	-0.158	0.0825	impact	-0.182391	0.0956494	deprivation
R50-R69	4	1915	0.06989	-0.156	0.0743	incidence	-0.02477	0.114996	deprivation
R50-R69	4	1915	0.06989	-0.156	0.0743	impact	-0.18077	0.136911	deprivation
R50-R69	4	1925	0.06989	-0.156	0.0743	incidence	0.26841	0.101205	deprivation
R50-R69	4	1925	0.06989	-0.156	0.0743	impact	0.11241	0.125551	deprivation
R50-R69	4	1935	0.06989	-0.156	0.0743	incidence	0.2769	0.0911937	deprivation
R50-R69	4	1935	0.06989	-0.156	0.0743	impact	0.1209	0.11763	deprivation
R50-R69	4	1945	0.06989	-0.156	0.0743	incidence	0.184001	0.0757631	deprivation
R50-R69	4	1945	0.06989	-0.156	0.0743	impact	0.028001	0.106116	deprivation
R50-R69	4	1955	0.06989	-0.156	0.0743	incidence	0.023429	0.046	deprivation
R50-R69	4	1955	0.06989	-0.156	0.0743	impact	-0.132571	0.087387	deprivation
R50-R69	5	1915	0.0726	-0.112	0.0409	incidence	-0.04379	0.113441	deprivation
R50-R69	5	1915	0.0726	-0.112	0.0409	impact	-0.15579	0.120589	deprivation
R50-R69	5	1925	0.0726	-0.112	0.0409	incidence	0.15768	0.0988032	deprivation
R50-R69	5	1925	0.0726	-0.112	0.0409	impact	0.04568	0.106934	deprivation
R50-R69	5	1935	0.0726	-0.112	0.0409	incidence	0.23468	0.0890587	deprivation
R50-R69	5	1935	0.0726	-0.112	0.0409	impact	0.12268	0.0980013	deprivation
R50-R69	5	1945	0.0726	-0.112	0.0409	incidence	0.179245	0.0741837	deprivation
R50-R69	5	1945	0.0726	-0.112	0.0409	impact	0.067245	0.0847115	deprivation
R50-R69	5	1955	0.0726	-0.112	0.0409	incidence	-0.008065	0.0451	deprivation
R50-R69	5	1955	0.0726	-0.112	0.0409	impact	-0.120065	0.0608837	deprivation
R50-R69	6	1915	0.08086	-0.0859	0.074	incidence	-0.01488	0.109959	deprivation
R50-R69	6	1915	0.08086	-0.0859	0.074	impact	-0.10078	0.132541	deprivation
R50-R69	6	1925	0.08086	-0.0859	0.074	incidence	0.18986	0.0947124	deprivation
R50-R69	6	1925	0.08086	-0.0859	0.074	impact	0.10396	0.120193	deprivation
R50-R69	6	1935	0.08086	-0.0859	0.074	incidence	0.24522	0.0849568	deprivation
R50-R69	6	1935	0.08086	-0.0859	0.074	impact	0.15932	0.112666	deprivation
R50-R69	6	1945	0.08086	-0.0859	0.074	incidence	0.099416	0.0706231	deprivation
R50-R69	6	1945	0.08086	-0.0859	0.074	impact	0.013516	0.102292	deprivation
R50-R69	6	1955	0.08086	-0.0859	0.074	incidence	0.050334	0.0429	deprivation
R50-R69	6	1955	0.08086	-0.0859	0.074	impact	-0.035566	0.085536	deprivation
R50-R69	7	1915	0.08435	0.219	0.05	incidence	-0.04133	0.106236	deprivation
R50-R69	7	1915	0.08435	0.219	0.05	impact	0.17767	0.117414	deprivation
R50-R69	7	1925	0.08435	0.219	0.05	incidence	0.20765	0.0911002	deprivation
R50-R69	7	1925	0.08435	0.219	0.05	impact	0.42665	0.103919	deprivation
R50-R69	7	1935	0.08435	0.219	0.05	incidence	0.19958	0.0818338	deprivation
R50-R69	7	1935	0.08435	0.219	0.05	impact	0.41858	0.0958998	deprivation
R50-R69	7	1945	0.08435	0.219	0.05	incidence	0.158688	0.068184	deprivation
R50-R69	7	1945	0.08435	0.219	0.05	impact	0.377688	0.0845521	deprivation
R50-R69	7	1955	0.08435	0.219	0.05	incidence	0.078412	0.0415	deprivation
R50-R69	7	1955	0.08435	0.219	0.05	impact	0.297412	0.0649788	deprivation
R50-R69	8	1915	0.09114	0.143	0.0592	incidence	0.07823	0.100206	deprivation
R50-R69	8	1915	0.09114	0.143	0.0592	impact	0.22123	0.116387	deprivation
R50-R69	8	1925	0.09114	0.143	0.0592	incidence	0.20086	0.0856582	deprivation
R50-R69	8	1925	0.09114	0.143	0.0592	impact	0.34386	0.104125	deprivation
R50-R69	8	1935	0.09114	0.143	0.0592	incidence	0.22708	0.0766029	deprivation
R50-R69	8	1935	0.09114	0.143	0.0592	impact	0.37008	0.0968124	deprivation
R50-R69	8	1945	0.09114	0.143	0.0592	incidence	0.185102	0.0633205	deprivation
R50-R69	8	1945	0.09114	0.143	0.0592	impact	0.328102	0.0866841	deprivation
R50-R69	8	1955	0.09114	0.143	0.0592	incidence	0.018028	0.0382	deprivation
R50-R69	8	1955	0.09114	0.143	0.0592	impact	0.161028	0.0704548	deprivation
R50-R69	9	1915	0.09458	-0.00997	0.0592	incidence	0.00186	0.0996858	deprivation
R50-R69	9	1915	0.09458	-0.00997	0.0592	impact	-0.00811	0.115939	deprivation
R50-R69	9	1925	0.09458	-0.00997	0.0592	incidence	0.1654	0.0834945	deprivation
R50-R69	9	1925	0.09458	-0.00997	0.0592	impact	0.15543	0.102352	deprivation
R50-R69	9	1935	0.09458	-0.00997	0.0592	incidence	0.16923	0.0737906	deprivation
R50-R69	9	1935	0.09458	-0.00997	0.0592	impact	0.15926	0.0946028	deprivation
R50-R69	9	1945	0.09458	-0.00997	0.0592	incidence	0.127822	0.0605601	deprivation
R50-R69	9	1945	0.09458	-0.00997	0.0592	impact	0.117852	0.0846886	deprivation
R50-R69	9	1955	0.09458	-0.00997	0.0592	incidence	0.034698	0.0364	deprivation
R50-R69	9	1955	0.09458	-0.00997	0.0592	impact	0.024728	0.0694953	deprivation
R50-R69	10	1915	0.10377	0.229	0.0593	incidence	0.03379	0.0985845	deprivation
R50-R69	10	1915	0.10377	0.229	0.0593	impact	0.26279	0.115045	deprivation
R50-R69	10	1925	0.10377	0.229	0.0593	incidence	0.06358	0.0796509	deprivation
R50-R69	10	1925	0.10377	0.229	0.0593	impact	0.29258	0.0993013	deprivation
R50-R69	10	1935	0.10377	0.229	0.0593	incidence	0.12174	0.0691466	deprivation
R50-R69	10	1935	0.10377	0.229	0.0593	impact	0.35074	0.0910919	deprivation
R50-R69	10	1945	0.10377	0.229	0.0593	incidence	0.104863	0.0557441	deprivation
R50-R69	10	1945	0.10377	0.229	0.0593	impact	0.333863	0.0813873	deprivation
R50-R69	10	1955	0.10377	0.229	0.0593	incidence	0.050077	0.0329	deprivation
R50-R69	10	1955	0.10377	0.229	0.0593	impact	0.279077	0.0678152	deprivation
C15-C26	1	1915	0.07182	0.503	0.0999	incidence	0.07774	0.186761	deprivation
C15-C26	1	1915	0.07182	0.503	0.0999	impact	0.58074	0.211801	deprivation
C15-C26	1	1925	0.07182	0.503	0.0999	incidence	0.25467	0.15193	deprivation
C15-C26	1	1925	0.07182	0.503	0.0999	impact	0.75767	0.181832	deprivation
C15-C26	1	1935	0.07182	0.503	0.0999	incidence	0.23355	0.138033	deprivation
C15-C26	1	1935	0.07182	0.503	0.0999	impact	0.73655	0.170391	deprivation
C15-C26	1	1945	0.07182	0.503	0.0999	incidence	0.400112	0.122284	deprivation
C15-C26	1	1945	0.07182	0.503	0.0999	impact	0.903112	0.157903	deprivation
C15-C26	1	1955	0.07182	0.503	0.0999	incidence	0.242328	0.0794	deprivation
C15-C26	1	1955	0.07182	0.503	0.0999	impact	0.745328	0.12761	deprivation
C15-C26	2	1915	0.07297	0.504	0.1334	incidence	0.13706	0.188903	deprivation
C15-C26	2	1915	0.07297	0.504	0.1334	impact	0.64106	0.231257	deprivation
C15-C26	2	1925	0.07297	0.504	0.1334	incidence	0.20281	0.146942	deprivation
C15-C26	2	1925	0.07297	0.504	0.1334	impact	0.70681	0.198463	deprivation
C15-C26	2	1935	0.07297	0.504	0.1334	incidence	0.32935	0.132523	deprivation
C15-C26	2	1935	0.07297	0.504	0.1334	impact	0.83335	0.188037	deprivation
C15-C26	2	1945	0.07297	0.504	0.1334	incidence	0.360394	0.117175	deprivation
C15-C26	2	1945	0.07297	0.504	0.1334	impact	0.864394	0.177554	deprivation
C15-C26	2	1955	0.07297	0.504	0.1334	incidence	0.269166	0.0761	deprivation
C15-C26	2	1955	0.07297	0.504	0.1334	impact	0.773166	0.15358	deprivation
C15-C26	3	1915	0.0707	0.448	0.1607	incidence	0.02371	0.185301	deprivation
C15-C26	3	1915	0.0707	0.448	0.1607	impact	0.47171	0.245277	deprivation
C15-C26	3	1925	0.0707	0.448	0.1607	incidence	0.20086	0.149246	deprivation
C15-C26	3	1925	0.0707	0.448	0.1607	impact	0.64886	0.219315	deprivation
C15-C26	3	1935	0.0707	0.448	0.1607	incidence	0.32865	0.135416	deprivation
C15-C26	3	1935	0.0707	0.448	0.1607	impact	0.77665	0.210147	deprivation
C15-C26	3	1945	0.0707	0.448	0.1607	incidence	0.292453	0.119488	deprivation
C15-C26	3	1945	0.0707	0.448	0.1607	impact	0.740453	0.200254	deprivation
C15-C26	3	1955	0.0707	0.448	0.1607	incidence	0.392807	0.0772	deprivation
C15-C26	3	1955	0.0707	0.448	0.1607	impact	0.840807	0.178282	deprivation
C15-C26	4	1915	0.07253	0.446	0.0749	incidence	0.07148	0.183561	deprivation
C15-C26	4	1915	0.07253	0.446	0.0749	impact	0.51748	0.198254	deprivation
C15-C26	4	1925	0.07253	0.446	0.0749	incidence	0.18377	0.145158	deprivation
C15-C26	4	1925	0.07253	0.446	0.0749	impact	0.62977	0.163343	deprivation
C15-C26	4	1935	0.07253	0.446	0.0749	incidence	0.19018	0.131245	deprivation
C15-C26	4	1935	0.07253	0.446	0.0749	impact	0.63618	0.151114	deprivation
C15-C26	4	1945	0.07253	0.446	0.0749	incidence	0.354925	0.116372	deprivation
C15-C26	4	1945	0.07253	0.446	0.0749	impact	0.800925	0.138393	deprivation
C15-C26	4	1955	0.07253	0.446	0.0749	incidence	0.297015	0.0758	deprivation
C15-C26	4	1955	0.07253	0.446	0.0749	impact	0.743015	0.106563	deprivation
C15-C26	5	1915	0.07538	0.535	0.1503	incidence	0.19278	0.177182	deprivation
C15-C26	5	1915	0.07538	0.535	0.1503	impact	0.72778	0.232343	deprivation
C15-C26	5	1925	0.07538	0.535	0.1503	incidence	0.13871	0.142386	deprivation
C15-C26	5	1925	0.07538	0.535	0.1503	impact	0.67371	0.207036	deprivation
C15-C26	5	1935	0.07538	0.535	0.1503	incidence	0.35098	0.129113	deprivation
C15-C26	5	1935	0.07538	0.535	0.1503	impact	0.88598	0.198142	deprivation
C15-C26	5	1945	0.07538	0.535	0.1503	incidence	0.269528	0.114604	deprivation
C15-C26	5	1945	0.07538	0.535	0.1503	impact	0.804528	0.189009	deprivation
C15-C26	5	1955	0.07538	0.535	0.1503	incidence	0.398452	0.0746	deprivation
C15-C26	5	1955	0.07538	0.535	0.1503	impact	0.933452	0.167795	deprivation
C15-C26	6	1915	0.07905	0.259	0.0994	incidence	-0.16212	0.181403	deprivation
C15-C26	6	1915	0.07905	0.259	0.0994	impact	0.09688	0.206851	deprivation
C15-C26	6	1925	0.07905	0.259	0.0994	incidence	0.1963	0.140044	deprivation
C15-C26	6	1925	0.07905	0.259	0.0994	impact	0.4553	0.171735	deprivation
C15-C26	6	1935	0.07905	0.259	0.0994	incidence	0.26634	0.127331	deprivation
C15-C26	6	1935	0.07905	0.259	0.0994	impact	0.52534	0.161535	deprivation
C15-C26	6	1945	0.07905	0.259	0.0994	incidence	0.352256	0.112805	deprivation
C15-C26	6	1945	0.07905	0.259	0.0994	impact	0.611256	0.150351	deprivation
C15-C26	6	1955	0.07905	0.259	0.0994	incidence	0.244964	0.073	deprivation
C15-C26	6	1955	0.07905	0.259	0.0994	impact	0.503964	0.123326	deprivation
C15-C26	7	1915	0.08115	0.215	0.1191	incidence	0.09167	0.169063	deprivation
C15-C26	7	1915	0.08115	0.215	0.1191	impact	0.30667	0.206802	deprivation
C15-C26	7	1925	0.08115	0.215	0.1191	incidence	0.23726	0.133607	deprivation
C15-C26	7	1925	0.08115	0.215	0.1191	impact	0.45226	0.178985	deprivation
C15-C26	7	1935	0.08115	0.215	0.1191	incidence	0.19947	0.121317	deprivation
C15-C26	7	1935	0.08115	0.215	0.1191	impact	0.41447	0.170008	deprivation
C15-C26	7	1945	0.08115	0.215	0.1191	incidence	0.292953	0.107285	deprivation
C15-C26	7	1945	0.08115	0.215	0.1191	impact	0.507953	0.160296	deprivation
C15-C26	7	1955	0.08115	0.215	0.1191	incidence	0.262277	0.0693	deprivation
C15-C26	7	1955	0.08115	0.215	0.1191	impact	0.477277	0.137794	deprivation
C15-C26	8	1915	0.08203	0.294	0.1213	incidence	0.29319	0.165706	deprivation
C15-C26	8	1915	0.08203	0.294	0.1213	impact	0.58719	0.205359	deprivation
C15-C26	8	1925	0.08203	0.294	0.1213	incidence	0.27641	0.13247	deprivation
C15-C26	8	1925	0.08203	0.294	0.1213	impact	0.57041	0.179616	deprivation
C15-C26	8	1935	0.08203	0.294	0.1213	incidence	0.26739	0.120261	deprivation
C15-C26	8	1935	0.08203	0.294	0.1213	impact	0.56139	0.170811	deprivation
C15-C26	8	1945	0.08203	0.294	0.1213	incidence	0.309029	0.106416	deprivation
C15-C26	8	1945	0.08203	0.294	0.1213	impact	0.603029	0.161363	deprivation
C15-C26	8	1955	0.08203	0.294	0.1213	incidence	0.270641	0.0689	deprivation
C15-C26	8	1955	0.08203	0.294	0.1213	impact	0.564641	0.139502	deprivation
C15-C26	9	1915	0.0805	0.293	0.1242	incidence	0.04861	0.173661	deprivation
C15-C26	9	1915	0.0805	0.293	0.1242	impact	0.34161	0.213504	deprivation
C15-C26	9	1925	0.0805	0.293	0.1242	incidence	0.15249	0.133957	deprivation
C15-C26	9	1925	0.0805	0.293	0.1242	impact	0.44549	0.182675	deprivation
C15-C26	9	1935	0.0805	0.293	0.1242	incidence	0.30791	0.121471	deprivation
C15-C26	9	1935	0.0805	0.293	0.1242	impact	0.60091	0.173727	deprivation
C15-C26	9	1945	0.0805	0.293	0.1242	incidence	0.294787	0.10708	deprivation
C15-C26	9	1945	0.0805	0.293	0.1242	impact	0.587787	0.163987	deprivation
C15-C26	9	1955	0.0805	0.293	0.1242	incidence	0.223573	0.0691	deprivation
C15-C26	9	1955	0.0805	0.293	0.1242	impact	0.516573	0.142128	deprivation
C15-C26	10	1915	0.08054	0.486	0.1388	incidence	0.10824	0.175712	deprivation
C15-C26	10	1915	0.08054	0.486	0.1388	impact	0.59424	0.22392	deprivation
C15-C26	10	1925	0.08054	0.486	0.1388	incidence	0.11775	0.1324	deprivation
C15-C26	10	1925	0.08054	0.486	0.1388	impact	0.60375	0.19182	deprivation
C15-C26	10	1935	0.08054	0.486	0.1388	incidence	0.21195	0.118444	deprivation
C15-C26	10	1935	0.08054	0.486	0.1388	impact	0.69795	0.182468	deprivation
C15-C26	10	1945	0.08054	0.486	0.1388	incidence	0.393053	0.103774	deprivation
C15-C26	10	1945	0.08054	0.486	0.1388	impact	0.879053	0.173305	deprivation
C15-C26	10	1955	0.08054	0.486	0.1388	incidence	0.298027	0.0667	deprivation
C15-C26	10	1955	0.08054	0.486	0.1388	impact	0.784027	0.153995	deprivation
I30-I52	1	1915	0.05901	0.385	0.1052	incidence	0.0742	0.133347	deprivation
I30-I52	1	1915	0.05901	0.385	0.1052	impact	0.4592	0.169849	deprivation
I30-I52	1	1925	0.05901	0.385	0.1052	incidence	0.28391	0.118373	deprivation
I30-I52	1	1925	0.05901	0.385	0.1052	impact	0.66891	0.158364	deprivation
I30-I52	1	1935	0.05901	0.385	0.1052	incidence	0.31469	0.109357	deprivation
I30-I52	1	1935	0.05901	0.385	0.1052	impact	0.69969	0.151743	deprivation
I30-I52	1	1945	0.05901	0.385	0.1052	incidence	0.188708	0.0960661	deprivation
I30-I52	1	1945	0.05901	0.385	0.1052	impact	0.573708	0.142463	deprivation
I30-I52	1	1955	0.05901	0.385	0.1052	incidence	0.092032	0.0615	deprivation
I30-I52	1	1955	0.05901	0.385	0.1052	impact	0.477032	0.121858	deprivation
I30-I52	2	1915	0.06281	0.204	0.0691	incidence	0.07017	0.13088	deprivation
I30-I52	2	1915	0.06281	0.204	0.0691	impact	0.27417	0.148002	deprivation
I30-I52	2	1925	0.06281	0.204	0.0691	incidence	0.28593	0.114709	deprivation
I30-I52	2	1925	0.06281	0.204	0.0691	impact	0.48993	0.133914	deprivation
I30-I52	2	1935	0.06281	0.204	0.0691	incidence	0.35049	0.105401	deprivation
I30-I52	2	1935	0.06281	0.204	0.0691	impact	0.55449	0.126033	deprivation
I30-I52	2	1945	0.06281	0.204	0.0691	incidence	0.277257	0.092828	deprivation
I30-I52	2	1945	0.06281	0.204	0.0691	impact	0.481257	0.115723	deprivation
I30-I52	2	1955	0.06281	0.204	0.0691	incidence	0.270313	0.0598	deprivation
I30-I52	2	1955	0.06281	0.204	0.0691	impact	0.474313	0.091383	deprivation
I30-I52	3	1915	0.06088	-0.0376	0.1333	incidence	0.07614	0.127046	deprivation
I30-I52	3	1915	0.06088	-0.0376	0.1333	impact	0.03854	0.184145	deprivation
I30-I52	3	1925	0.06088	-0.0376	0.1333	incidence	0.29304	0.112573	deprivation
I30-I52	3	1925	0.06088	-0.0376	0.1333	impact	0.25544	0.174475	deprivation
I30-I52	3	1935	0.06088	-0.0376	0.1333	incidence	0.3234	0.103706	deprivation
I30-I52	3	1935	0.06088	-0.0376	0.1333	impact	0.2858	0.16889	deprivation
I30-I52	3	1945	0.06088	-0.0376	0.1333	incidence	0.30371	0.0909447	deprivation
I30-I52	3	1945	0.06088	-0.0376	0.1333	impact	0.26611	0.161369	deprivation
I30-I52	3	1955	0.06088	-0.0376	0.1333	incidence	0.10156	0.0583	deprivation
I30-I52	3	1955	0.06088	-0.0376	0.1333	impact	0.06396	0.145492	deprivation
I30-I52	4	1915	0.06727	0.284	0.1168	incidence	0.10138	0.12236	deprivation
I30-I52	4	1915	0.06727	0.284	0.1168	impact	0.38538	0.169157	deprivation
I30-I52	4	1925	0.06727	0.284	0.1168	incidence	0.27111	0.108265	deprivation
I30-I52	4	1925	0.06727	0.284	0.1168	impact	0.55511	0.159259	deprivation
I30-I52	4	1935	0.06727	0.284	0.1168	incidence	0.35227	0.0996634	deprivation
I30-I52	4	1935	0.06727	0.284	0.1168	impact	0.63627	0.153542	deprivation
I30-I52	4	1945	0.06727	0.284	0.1168	incidence	0.218173	0.0874108	deprivation
I30-I52	4	1945	0.06727	0.284	0.1168	impact	0.502173	0.145887	deprivation
I30-I52	4	1955	0.06727	0.284	0.1168	incidence	0.070537	0.0559	deprivation
I30-I52	4	1955	0.06727	0.284	0.1168	impact	0.354537	0.129488	deprivation
I30-I52	5	1915	0.07252	0.23	0.0366	incidence	0.15943	0.120885	deprivation
I30-I52	5	1915	0.07252	0.23	0.0366	impact	0.38943	0.126305	deprivation
I30-I52	5	1925	0.07252	0.23	0.0366	incidence	0.2209	0.106915	deprivation
I30-I52	5	1925	0.07252	0.23	0.0366	impact	0.4509	0.113006	deprivation
I30-I52	5	1935	0.07252	0.23	0.0366	incidence	0.28811	0.0988032	deprivation
I30-I52	5	1935	0.07252	0.23	0.0366	impact	0.51811	0.105364	deprivation
I30-I52	5	1945	0.07252	0.23	0.0366	incidence	0.226504	0.0870395	deprivation
I30-I52	5	1945	0.07252	0.23	0.0366	impact	0.456504	0.0944216	deprivation
I30-I52	5	1955	0.07252	0.23	0.0366	incidence	0.134706	0.0558	deprivation
I30-I52	5	1955	0.07252	0.23	0.0366	impact	0.364706	0.0667323	deprivation
I30-I52	6	1915	0.07431	0.253	0.0737	incidence	0.11339	0.121597	deprivation
I30-I52	6	1915	0.07431	0.253	0.0737	impact	0.36639	0.142188	deprivation
I30-I52	6	1925	0.07431	0.253	0.0737	incidence	0.29687	0.106632	deprivation
I30-I52	6	1925	0.07431	0.253	0.0737	impact	0.54987	0.129623	deprivation
I30-I52	6	1935	0.07431	0.253	0.0737	incidence	0.35698	0.0984531	deprivation
I30-I52	6	1935	0.07431	0.253	0.0737	impact	0.60998	0.122983	deprivation
I30-I52	6	1945	0.07431	0.253	0.0737	incidence	0.323109	0.0868738	deprivation
I30-I52	6	1945	0.07431	0.253	0.0737	impact	0.576109	0.113924	deprivation
I30-I52	6	1955	0.07431	0.253	0.0737	incidence	0.151221	0.0559	deprivation
I30-I52	6	1955	0.07431	0.253	0.0737	impact	0.404221	0.0925014	deprivation
I30-I52	7	1915	0.0814	0.264	0.0761	incidence	0.15529	0.116078	deprivation
I30-I52	7	1915	0.0814	0.264	0.0761	impact	0.41929	0.1388	deprivation
I30-I52	7	1925	0.0814	0.264	0.0761	incidence	0.31119	0.101607	deprivation
I30-I52	7	1925	0.0814	0.264	0.0761	impact	0.57519	0.126946	deprivation
I30-I52	7	1935	0.0814	0.264	0.0761	incidence	0.31878	0.093852	deprivation
I30-I52	7	1935	0.0814	0.264	0.0761	impact	0.58278	0.120828	deprivation
I30-I52	7	1945	0.0814	0.264	0.0761	incidence	0.382809	0.0828922	deprivation
I30-I52	7	1945	0.0814	0.264	0.0761	impact	0.646809	0.112527	deprivation
I30-I52	7	1955	0.0814	0.264	0.0761	incidence	0.099671	0.0534	deprivation
I30-I52	7	1955	0.0814	0.264	0.0761	impact	0.363671	0.0929665	deprivation
I30-I52	8	1915	0.08139	0.116	0.0487	incidence	0.22278	0.112954	deprivation
I30-I52	8	1915	0.08139	0.116	0.0487	impact	0.33878	0.123005	deprivation
I30-I52	8	1925	0.08139	0.116	0.0487	incidence	0.27883	0.0987126	deprivation
I30-I52	8	1925	0.08139	0.116	0.0487	impact	0.39483	0.110072	deprivation
I30-I52	8	1935	0.08139	0.116	0.0487	incidence	0.33754	0.0910877	deprivation
I30-I52	8	1935	0.08139	0.116	0.0487	impact	0.45354	0.103289	deprivation
I30-I52	8	1945	0.08139	0.116	0.0487	incidence	0.329227	0.0800999	deprivation
I30-I52	8	1945	0.08139	0.116	0.0487	impact	0.445227	0.0937427	deprivation
I30-I52	8	1955	0.08139	0.116	0.0487	incidence	0.197893	0.0512	deprivation
I30-I52	8	1955	0.08139	0.116	0.0487	impact	0.313893	0.0706621	deprivation
I30-I52	9	1915	0.08033	0.0407	0.0909	incidence	0.15166	0.114237	deprivation
I30-I52	9	1915	0.08033	0.0407	0.0909	impact	0.19236	0.145989	deprivation
I30-I52	9	1925	0.08033	0.0407	0.0909	incidence	0.28231	0.0987915	deprivation
I30-I52	9	1925	0.08033	0.0407	0.0909	impact	0.32301	0.134248	deprivation
I30-I52	9	1935	0.08033	0.0407	0.0909	incidence	0.31957	0.0908788	deprivation
I30-I52	9	1935	0.08033	0.0407	0.0909	impact	0.36027	0.128537	deprivation
I30-I52	9	1945	0.08033	0.0407	0.0909	incidence	0.31993	0.0800745	deprivation
I30-I52	9	1945	0.08033	0.0407	0.0909	impact	0.36063	0.121139	deprivation
I30-I52	9	1955	0.08033	0.0407	0.0909	incidence	0.27352	0.0514	deprivation
I30-I52	9	1955	0.08033	0.0407	0.0909	impact	0.31422	0.104426	deprivation
I30-I52	10	1915	0.07841	0.072	0.0981	incidence	0.11357	0.116115	deprivation
I30-I52	10	1915	0.07841	0.072	0.0981	impact	0.18557	0.152008	deprivation
I30-I52	10	1925	0.07841	0.072	0.0981	incidence	0.27465	0.0979748	deprivation
I30-I52	10	1925	0.07841	0.072	0.0981	impact	0.34665	0.138646	deprivation
I30-I52	10	1935	0.07841	0.072	0.0981	incidence	0.36052	0.0890552	deprivation
I30-I52	10	1935	0.07841	0.072	0.0981	impact	0.43252	0.132493	deprivation
I30-I52	10	1945	0.07841	0.072	0.0981	incidence	0.370911	0.077579	deprivation
I30-I52	10	1945	0.07841	0.072	0.0981	impact	0.442911	0.125068	deprivation
I30-I52	10	1955	0.07841	0.072	0.0981	incidence	0.300299	0.0493	deprivation
I30-I52	10	1955	0.07841	0.072	0.0981	impact	0.372299	0.109791	deprivation
C76-C80	1	1915	0.06351	0.353	0.1424	incidence	-0.16709	0.251627	deprivation
C76-C80	1	1915	0.06351	0.353	0.1424	impact	0.18591	0.289126	deprivation
C76-C80	1	1925	0.06351	0.353	0.1424	incidence	0.0336	0.192246	deprivation
C76-C80	1	1925	0.06351	0.353	0.1424	impact	0.3866	0.239241	deprivation
C76-C80	1	1935	0.06351	0.353	0.1424	incidence	0.14633	0.170178	deprivation
C76-C80	1	1935	0.06351	0.353	0.1424	impact	0.49933	0.221897	deprivation
C76-C80	1	1945	0.06351	0.353	0.1424	incidence	0.318316	0.147244	deprivation
C76-C80	1	1945	0.06351	0.353	0.1424	impact	0.671316	0.204838	deprivation
C76-C80	1	1955	0.06351	0.353	0.1424	incidence	-0.040836	0.0938	deprivation
C76-C80	1	1955	0.06351	0.353	0.1424	impact	0.312164	0.170517	deprivation
C76-C80	2	1915	0.06043	0.062	0.2428	incidence	0.00567	0.255859	deprivation
C76-C80	2	1915	0.06043	0.062	0.2428	impact	0.06767	0.352726	deprivation
C76-C80	2	1925	0.06043	0.062	0.2428	incidence	0.06689	0.18922	deprivation
C76-C80	2	1925	0.06043	0.062	0.2428	impact	0.12889	0.307824	deprivation
C76-C80	2	1935	0.06043	0.062	0.2428	incidence	0.18554	0.164947	deprivation
C76-C80	2	1935	0.06043	0.062	0.2428	impact	0.24754	0.293529	deprivation
C76-C80	2	1945	0.06043	0.062	0.2428	incidence	0.194471	0.14072	deprivation
C76-C80	2	1945	0.06043	0.062	0.2428	impact	0.256471	0.280631	deprivation
C76-C80	2	1955	0.06043	0.062	0.2428	incidence	0.215009	0.089	deprivation
C76-C80	2	1955	0.06043	0.062	0.2428	impact	0.277009	0.258598	deprivation
C76-C80	3	1915	0.06169	0.461	0.1858	incidence	-0.09045	0.250907	deprivation
C76-C80	3	1915	0.06169	0.461	0.1858	impact	0.37055	0.312211	deprivation
C76-C80	3	1925	0.06169	0.461	0.1858	incidence	0.13537	0.188078	deprivation
C76-C80	3	1925	0.06169	0.461	0.1858	impact	0.59637	0.264377	deprivation
C76-C80	3	1935	0.06169	0.461	0.1858	incidence	0.21269	0.165684	deprivation
C76-C80	3	1935	0.06169	0.461	0.1858	impact	0.67369	0.248943	deprivation
C76-C80	3	1945	0.06169	0.461	0.1858	incidence	0.186059	0.142507	deprivation
C76-C80	3	1945	0.06169	0.461	0.1858	impact	0.647059	0.234158	deprivation
C76-C80	3	1955	0.06169	0.461	0.1858	incidence	0.197771	0.0906	deprivation
C76-C80	3	1955	0.06169	0.461	0.1858	impact	0.658771	0.206712	deprivation
C76-C80	4	1915	0.06455	0.429	0.2195	incidence	-0.16288	0.249034	deprivation
C76-C80	4	1915	0.06455	0.429	0.2195	impact	0.26612	0.331961	deprivation
C76-C80	4	1925	0.06455	0.429	0.2195	incidence	0.16065	0.185069	deprivation
C76-C80	4	1925	0.06455	0.429	0.2195	impact	0.58965	0.287108	deprivation
C76-C80	4	1935	0.06455	0.429	0.2195	incidence	0.18959	0.163957	deprivation
C76-C80	4	1935	0.06455	0.429	0.2195	impact	0.61859	0.273975	deprivation
C76-C80	4	1945	0.06455	0.429	0.2195	incidence	0.277776	0.142339	deprivation
C76-C80	4	1945	0.06455	0.429	0.2195	impact	0.706776	0.261612	deprivation
C76-C80	4	1955	0.06455	0.429	0.2195	incidence	0.493504	0.0913	deprivation
C76-C80	4	1955	0.06455	0.429	0.2195	impact	0.922504	0.237731	deprivation
C76-C80	5	1915	0.06494	0.28	0.1804	incidence	0.0424	0.238184	deprivation
C76-C80	5	1915	0.06494	0.28	0.1804	impact	0.3224	0.298791	deprivation
C76-C80	5	1925	0.06494	0.28	0.1804	incidence	0.10603	0.17916	deprivation
C76-C80	5	1925	0.06494	0.28	0.1804	impact	0.38603	0.254249	deprivation
C76-C80	5	1935	0.06494	0.28	0.1804	incidence	0.25956	0.158344	deprivation
C76-C80	5	1935	0.06494	0.28	0.1804	impact	0.53956	0.240036	deprivation
C76-C80	5	1945	0.06494	0.28	0.1804	incidence	0.175451	0.137665	deprivation
C76-C80	5	1945	0.06494	0.28	0.1804	impact	0.455451	0.226927	deprivation
C76-C80	5	1955	0.06494	0.28	0.1804	incidence	0.229619	0.0882	deprivation
C76-C80	5	1955	0.06494	0.28	0.1804	impact	0.509619	0.200807	deprivation
C76-C80	6	1915	0.06744	0.582	0.1907	incidence	0.34348	0.239357	deprivation
C76-C80	6	1915	0.06744	0.582	0.1907	impact	0.92548	0.306036	deprivation
C76-C80	6	1925	0.06744	0.582	0.1907	incidence	0.0557	0.177421	deprivation
C76-C80	6	1925	0.06744	0.582	0.1907	impact	0.6377	0.26047	deprivation
C76-C80	6	1935	0.06744	0.582	0.1907	incidence	0.24247	0.156293	deprivation
C76-C80	6	1935	0.06744	0.582	0.1907	impact	0.82447	0.246564	deprivation
C76-C80	6	1945	0.06744	0.582	0.1907	incidence	0.277423	0.135502	deprivation
C76-C80	6	1945	0.06744	0.582	0.1907	impact	0.859423	0.233939	deprivation
C76-C80	6	1955	0.06744	0.582	0.1907	incidence	0.190157	0.0865	deprivation
C76-C80	6	1955	0.06744	0.582	0.1907	impact	0.772157	0.209401	deprivation
C76-C80	7	1915	0.06698	0.479	0.1987	incidence	-0.01655	0.233752	deprivation
C76-C80	7	1915	0.06698	0.479	0.1987	impact	0.46245	0.306793	deprivation
C76-C80	7	1925	0.06698	0.479	0.1987	incidence	0.10669	0.173535	deprivation
C76-C80	7	1925	0.06698	0.479	0.1987	impact	0.58569	0.263811	deprivation
C76-C80	7	1935	0.06698	0.479	0.1987	incidence	0.19728	0.153944	deprivation
C76-C80	7	1935	0.06698	0.479	0.1987	impact	0.67628	0.251357	deprivation
C76-C80	7	1945	0.06698	0.479	0.1987	incidence	0.298944	0.133212	deprivation
C76-C80	7	1945	0.06698	0.479	0.1987	impact	0.777944	0.239222	deprivation
C76-C80	7	1955	0.06698	0.479	0.1987	incidence	0.159326	0.0846	deprivation
C76-C80	7	1955	0.06698	0.479	0.1987	impact	0.638326	0.21596	deprivation
C76-C80	8	1915	0.06417	0.518	0.181	incidence	0.0111	0.238022	deprivation
C76-C80	8	1915	0.06417	0.518	0.181	impact	0.5291	0.299024	deprivation
C76-C80	8	1925	0.06417	0.518	0.181	incidence	0.18136	0.176358	deprivation
C76-C80	8	1925	0.06417	0.518	0.181	impact	0.69936	0.252711	deprivation
C76-C80	8	1935	0.06417	0.518	0.181	incidence	0.1664	0.156768	deprivation
C76-C80	8	1935	0.06417	0.518	0.181	impact	0.6844	0.239452	deprivation
C76-C80	8	1945	0.06417	0.518	0.181	incidence	0.273645	0.136795	deprivation
C76-C80	8	1945	0.06417	0.518	0.181	impact	0.791645	0.226878	deprivation
C76-C80	8	1955	0.06417	0.518	0.181	incidence	0.302835	0.0878	deprivation
C76-C80	8	1955	0.06417	0.518	0.181	impact	0.820835	0.201171	deprivation
C76-C80	9	1915	0.07071	0.411	0.1457	incidence	0.21164	0.233621	deprivation
C76-C80	9	1915	0.07071	0.411	0.1457	impact	0.62264	0.275331	deprivation
C76-C80	9	1925	0.07071	0.411	0.1457	incidence	0.23906	0.169481	deprivation
C76-C80	9	1925	0.07071	0.411	0.1457	impact	0.65006	0.2235	deprivation
C76-C80	9	1935	0.07071	0.411	0.1457	incidence	0.21144	0.148884	deprivation
C76-C80	9	1935	0.07071	0.411	0.1457	impact	0.62244	0.208314	deprivation
C76-C80	9	1945	0.07071	0.411	0.1457	incidence	0.250318	0.12855	deprivation
C76-C80	9	1945	0.07071	0.411	0.1457	impact	0.661318	0.194303	deprivation
C76-C80	9	1955	0.07071	0.411	0.1457	incidence	0.341642	0.082	deprivation
C76-C80	9	1955	0.07071	0.411	0.1457	impact	0.752642	0.16719	deprivation
C76-C80	10	1915	0.06817	-0.137	0.2519	incidence	0.20966	0.244273	deprivation
C76-C80	10	1915	0.06817	-0.137	0.2519	impact	0.07266	0.350889	deprivation
C76-C80	10	1925	0.06817	-0.137	0.2519	incidence	0.016	0.175433	deprivation
C76-C80	10	1925	0.06817	-0.137	0.2519	impact	-0.121	0.306969	deprivation
C76-C80	10	1935	0.06817	-0.137	0.2519	incidence	0.23443	0.152148	deprivation
C76-C80	10	1935	0.06817	-0.137	0.2519	impact	0.09743	0.294283	deprivation
C76-C80	10	1945	0.06817	-0.137	0.2519	incidence	0.268284	0.131315	deprivation
C76-C80	10	1945	0.06817	-0.137	0.2519	impact	0.131284	0.284073	deprivation
C76-C80	10	1955	0.06817	-0.137	0.2519	incidence	0.524956	0.0838	deprivation
C76-C80	10	1955	0.06817	-0.137	0.2519	impact	0.387956	0.265473	deprivation
Z40-Z54	1	1915	0.05436	0.508	0.1214	incidence	0.26653	0.138042	deprivation
Z40-Z54	1	1915	0.05436	0.508	0.1214	impact	0.77453	0.18383	deprivation
Z40-Z54	1	1925	0.05436	0.508	0.1214	incidence	0.03265	0.0981536	deprivation
Z40-Z54	1	1925	0.05436	0.508	0.1214	impact	0.54065	0.156116	deprivation
Z40-Z54	1	1935	0.05436	0.508	0.1214	incidence	-0.03664	0.0818938	deprivation
Z40-Z54	1	1935	0.05436	0.508	0.1214	impact	0.47136	0.14644	deprivation
Z40-Z54	1	1945	0.05436	0.508	0.1214	incidence	0.015488	0.0666048	deprivation
Z40-Z54	1	1945	0.05436	0.508	0.1214	impact	0.523488	0.138471	deprivation
Z40-Z54	1	1955	0.05436	0.508	0.1214	incidence	-0.084348	0.0406	deprivation
Z40-Z54	1	1955	0.05436	0.508	0.1214	impact	0.423652	0.128009	deprivation
Z40-Z54	2	1915	0.05805	0.296	0.1157	incidence	0.04114	0.133062	deprivation
Z40-Z54	2	1915	0.05805	0.296	0.1157	impact	0.33714	0.176329	deprivation
Z40-Z54	2	1925	0.05805	0.296	0.1157	incidence	0.00632	0.0917281	deprivation
Z40-Z54	2	1925	0.05805	0.296	0.1157	impact	0.30232	0.14765	deprivation
Z40-Z54	2	1935	0.05805	0.296	0.1157	incidence	0.00445	0.0758876	deprivation
Z40-Z54	2	1935	0.05805	0.296	0.1157	impact	0.30045	0.138367	deprivation
Z40-Z54	2	1945	0.05805	0.296	0.1157	incidence	-0.025173	0.0612824	deprivation
Z40-Z54	2	1945	0.05805	0.296	0.1157	impact	0.270827	0.130928	deprivation
Z40-Z54	2	1955	0.05805	0.296	0.1157	incidence	-0.080067	0.0372	deprivation
Z40-Z54	2	1955	0.05805	0.296	0.1157	impact	0.215933	0.121533	deprivation
Z40-Z54	3	1915	0.05967	0.136	0.0591	incidence	0.14597	0.126283	deprivation
Z40-Z54	3	1915	0.05967	0.136	0.0591	impact	0.28197	0.139428	deprivation
Z40-Z54	3	1925	0.05967	0.136	0.0591	incidence	0.1359	0.0903441	deprivation
Z40-Z54	3	1925	0.05967	0.136	0.0591	impact	0.2719	0.107958	deprivation
Z40-Z54	3	1935	0.05967	0.136	0.0591	incidence	0.00531	0.0758876	deprivation
Z40-Z54	3	1935	0.05967	0.136	0.0591	impact	0.14131	0.096186	deprivation
Z40-Z54	3	1945	0.05967	0.136	0.0591	incidence	-0.017164	0.0613431	deprivation
Z40-Z54	3	1945	0.05967	0.136	0.0591	impact	0.118836	0.0851809	deprivation
Z40-Z54	3	1955	0.05967	0.136	0.0591	incidence	-0.051336	0.0373	deprivation
Z40-Z54	3	1955	0.05967	0.136	0.0591	impact	0.084664	0.0698863	deprivation
Z40-Z54	4	1915	0.05692	0.288	0.0692	incidence	0.18134	0.127007	deprivation
Z40-Z54	4	1915	0.05692	0.288	0.0692	impact	0.46934	0.144636	deprivation
Z40-Z54	4	1925	0.05692	0.288	0.0692	incidence	0.12067	0.0898439	deprivation
Z40-Z54	4	1925	0.05692	0.288	0.0692	impact	0.40867	0.113404	deprivation
Z40-Z54	4	1935	0.05692	0.288	0.0692	incidence	0.05896	0.0748124	deprivation
Z40-Z54	4	1935	0.05692	0.288	0.0692	impact	0.34696	0.101909	deprivation
Z40-Z54	4	1945	0.05692	0.288	0.0692	incidence	-0.049703	0.0605628	deprivation
Z40-Z54	4	1945	0.05692	0.288	0.0692	impact	0.238297	0.0919592	deprivation
Z40-Z54	4	1955	0.05692	0.288	0.0692	incidence	0.004753	0.0368	deprivation
Z40-Z54	4	1955	0.05692	0.288	0.0692	impact	0.292753	0.0783765	deprivation
Z40-Z54	5	1915	0.06141	0.41	0.0748	incidence	0.26153	0.121461	deprivation
Z40-Z54	5	1915	0.06141	0.41	0.0748	impact	0.67153	0.142646	deprivation
Z40-Z54	5	1925	0.06141	0.41	0.0748	incidence	-0.0388	0.0859257	deprivation
Z40-Z54	5	1925	0.06141	0.41	0.0748	impact	0.3712	0.113922	deprivation
Z40-Z54	5	1935	0.06141	0.41	0.0748	incidence	0.04062	0.0718171	deprivation
Z40-Z54	5	1935	0.06141	0.41	0.0748	impact	0.45062	0.103695	deprivation
Z40-Z54	5	1945	0.06141	0.41	0.0748	incidence	-0.01316	0.0581612	deprivation
Z40-Z54	5	1945	0.06141	0.41	0.0748	impact	0.39684	0.0947511	deprivation
Z40-Z54	5	1955	0.06141	0.41	0.0748	incidence	0.0003	0.0352	deprivation
Z40-Z54	5	1955	0.06141	0.41	0.0748	impact	0.4103	0.0826685	deprivation
Z40-Z54	6	1915	0.06444	0.184	0.0853	incidence	0.057	0.126173	deprivation
Z40-Z54	6	1915	0.06444	0.184	0.0853	impact	0.241	0.152301	deprivation
Z40-Z54	6	1925	0.06444	0.184	0.0853	incidence	0.00725	0.0845584	deprivation
Z40-Z54	6	1925	0.06444	0.184	0.0853	impact	0.19125	0.120109	deprivation
Z40-Z54	6	1935	0.06444	0.184	0.0853	incidence	0.00151	0.0700498	deprivation
Z40-Z54	6	1935	0.06444	0.184	0.0853	impact	0.18551	0.110377	deprivation
Z40-Z54	6	1945	0.06444	0.184	0.0853	incidence	-0.030004	0.0566613	deprivation
Z40-Z54	6	1945	0.06444	0.184	0.0853	impact	0.153996	0.102404	deprivation
Z40-Z54	6	1955	0.06444	0.184	0.0853	incidence	-0.050006	0.0343	deprivation
Z40-Z54	6	1955	0.06444	0.184	0.0853	impact	0.133994	0.0919379	deprivation
Z40-Z54	7	1915	0.06444	0.342	0.0583	incidence	0.12862	0.122724	deprivation
Z40-Z54	7	1915	0.06444	0.342	0.0583	impact	0.47062	0.135868	deprivation
Z40-Z54	7	1925	0.06444	0.342	0.0583	incidence	-0.05119	0.0818428	deprivation
Z40-Z54	7	1925	0.06444	0.342	0.0583	impact	0.29081	0.100484	deprivation
Z40-Z54	7	1935	0.06444	0.342	0.0583	incidence	-0.04509	0.0679241	deprivation
Z40-Z54	7	1935	0.06444	0.342	0.0583	impact	0.29691	0.089513	deprivation
Z40-Z54	7	1945	0.06444	0.342	0.0583	incidence	-0.005859	0.0547603	deprivation
Z40-Z54	7	1945	0.06444	0.342	0.0583	impact	0.336141	0.0799849	deprivation
Z40-Z54	7	1955	0.06444	0.342	0.0583	incidence	-0.047461	0.033	deprivation
Z40-Z54	7	1955	0.06444	0.342	0.0583	impact	0.294539	0.0669917	deprivation
Z40-Z54	8	1915	0.06346	0.404	0.0808	incidence	0.14382	0.122777	deprivation
Z40-Z54	8	1915	0.06346	0.404	0.0808	impact	0.54782	0.146979	deprivation
Z40-Z54	8	1925	0.06346	0.404	0.0808	incidence	-0.0167	0.0810264	deprivation
Z40-Z54	8	1925	0.06346	0.404	0.0808	impact	0.3873	0.114429	deprivation
Z40-Z54	8	1935	0.06346	0.404	0.0808	incidence	-0.0122	0.0667971	deprivation
Z40-Z54	8	1935	0.06346	0.404	0.0808	impact	0.3918	0.104836	deprivation
Z40-Z54	8	1945	0.06346	0.404	0.0808	incidence	0.026182	0.0538811	deprivation
Z40-Z54	8	1945	0.06346	0.404	0.0808	impact	0.430182	0.0971175	deprivation
Z40-Z54	8	1955	0.06346	0.404	0.0808	incidence	-0.073292	0.0326	deprivation
Z40-Z54	8	1955	0.06346	0.404	0.0808	impact	0.330708	0.0871286	deprivation
Z40-Z54	9	1915	0.06254	0.178	0.1077	incidence	-0.16262	0.128695	deprivation
Z40-Z54	9	1915	0.06254	0.178	0.1077	impact	0.01538	0.167815	deprivation
Z40-Z54	9	1925	0.06254	0.178	0.1077	incidence	-0.03119	0.0802268	deprivation
Z40-Z54	9	1925	0.06254	0.178	0.1077	impact	0.14681	0.134297	deprivation
Z40-Z54	9	1935	0.06254	0.178	0.1077	incidence	-0.12005	0.0654653	deprivation
Z40-Z54	9	1935	0.06254	0.178	0.1077	impact	0.05795	0.126036	deprivation
Z40-Z54	9	1945	0.06254	0.178	0.1077	incidence	-0.065832	0.05242	deprivation
Z40-Z54	9	1945	0.06254	0.178	0.1077	impact	0.112168	0.11978	deprivation
Z40-Z54	9	1955	0.06254	0.178	0.1077	incidence	-0.082148	0.0315	deprivation
Z40-Z54	9	1955	0.06254	0.178	0.1077	impact	0.095852	0.112212	deprivation
Z40-Z54	10	1915	0.06599	0.237	0.0504	incidence	0.07477	0.140294	deprivation
Z40-Z54	10	1915	0.06599	0.237	0.0504	impact	0.31177	0.149072	deprivation
Z40-Z54	10	1925	0.06599	0.237	0.0504	incidence	-0.10096	0.0831647	deprivation
Z40-Z54	10	1925	0.06599	0.237	0.0504	impact	0.13604	0.0972446	deprivation
Z40-Z54	10	1935	0.06599	0.237	0.0504	incidence	-0.10201	0.065315	deprivation
Z40-Z54	10	1935	0.06599	0.237	0.0504	impact	0.13499	0.0824998	deprivation
Z40-Z54	10	1945	0.06599	0.237	0.0504	incidence	-0.102115	0.0512821	deprivation
Z40-Z54	10	1945	0.06599	0.237	0.0504	impact	0.134885	0.0719028	deprivation
Z40-Z54	10	1955	0.06599	0.237	0.0504	incidence	-0.123925	0.0304	deprivation
[truncated: 1,901 more rows]
