# Supplementary material for: Trends in disease incidence and survival and their effect on mortality in Scotland: nationwide cohort study of linked hospital admission and death records 2001–2016
Source: BMJ Open. 2020 Mar 25;10(3):e034299. doi: 10.1136/bmjopen-2019-034299 (PMC7170664; doi:10.1136/bmjopen-2019-034299)
Supplement: Supplementary data [file bmjopen-2019-034299supp012.xlsx]

## Sheet: Hospital Visits
ICD10	Unstratified	Male	Female	SIMD 1	SIMD 2	SIMD 3	SIMD 4	SIMD 5	SIMD 6	SIMD 7	SIMD 8	SIMD 9	SIMD 10
J09-J18	110985	54896	56089	7252	7776	8751	9459	10358	11004	12978	13930	14406	15071
R00-R09	225504	109642	115862	15272	18020	18360	18633	20418	22175	25017	27572	28979	31058
C30-C39	54178	29657	24521	2895	3368	3643	4210	4779	5418	6287	7040	7831	8707
R10-R19	174055	68258	105797	12079	14415	14372	14847	16364	18102	19207	20624	21429	22616
R50-R69	157357	71014	86343	11363	12493	13392	14408	14842	15727	17003	18829	19170	20130
C15-C26	71981	40064	31917	6269	6442	6434	6747	7147	7280	7966	8129	7844	7723
I30-I52	142898	73086	69812	11666	12084	12791	13737	14379	14312	15845	16391	16281	15412
C76-C80	39339	18077	21262	3490	3437	3549	3828	4028	4029	4251	4216	4389	4122
Z40-Z54	157841	77906	79935	12101	13893	14324	14538	15932	16360	17423	17777	18091	17402
I60-I69	100907	47573	53334	7498	8086	8810	9378	9805	10290	10952	11903	12069	12116
K55-K63	206178	91114	115064	16228	18523	18172	18214	19789	20934	22228	23380	24145	24565
J40-J47	78467	33777	44690	3337	4159	5065	5654	6762	7675	9291	10862	11983	13679
I20-I25	175605	104230	71375	12769	14306	15055	15919	17142	18025	19688	20874	21235	20592
N30-N39	126329	51830	74499	10422	11152	11750	11300	12142	12490	13844	14379	14377	14473
K20-K31	172206	80887	91319	11156	14273	14354	14637	16561	17478	18855	20361	21734	22797
J20-J22	77520	35833	41687	4647	5420	6174	6656	7380	7662	8743	9513	10049	11276
S70-S79	78231	22042	56189	6346	6608	7494	7665	7939	7703	8451	8705	8716	8604
A30-A49	33613	15982	17631	2244	2533	2688	3109	3195	3363	3929	4164	4298	4090
T80-T88	75217	37899	37318	6647	6827	7006	7368	7477	7579	8212	8293	8020	7788
N17-N19	37213	19032	18181	2462	2760	3053	3327	3578	3802	4254	4650	4738	4589
I80-I89	84073	39544	44529	7315	8149	7999	7857	8384	8603	8884	8948	8943	8991
K90-K93	47091	23934	23157	3048	3542	3754	4054	4311	4639	5270	5536	6098	6839
I70-I79	47410	27229	20181	3235	3392	3922	4307	4698	4926	5415	5809	5821	5885
K50-K52	59183	22753	36430	4277	4976	5123	5226	5609	5907	6494	6936	7135	7500
S00-S09	64925	36484	28441	4311	4563	4997	5435	5927	6164	6991	7960	8607	9970
C50-C50	39358	339	39019	4213	4168	3981	4077	3958	3966	3939	3869	3787	3400
C60-C63	22312	22311	<10	2663	2499	2329	2326	2347	2177	2120	2113	1996	1742
G30-G32	4655	2024	2631	412	431	473	430	414	423	483	488	537	564
TOTAL	2664631	1257417	<1,407,223	195617	218295	227815	237346	255665	268213	294020	313251	322708	331701

## Sheet: Mortality (lnHR)
ICD10	Unstratified	Male	Female	SIMD 1	SIMD 2	SIMD 3	SIMD 4	SIMD 5	SIMD 6	SIMD 7	SIMD 8	SIMD 9	SIMD 10
J09-J18	1.66	1.68	1.66	1.74	1.64	1.65	1.6	1.65	1.67	1.69	1.71	1.68	1.66
R00-R09	0.73	0.76	0.71	0.71	0.7	0.73	0.74	0.75	0.75	0.76	0.72	0.71	0.7
C30-C39	3.05	2.92	3.23	3.12	3.19	3.17	3.1	3.19	3.06	3.06	2.96	2.96	2.92
R10-R19	0.94	1	0.89	1.02	0.97	0.96	0.94	0.94	0.94	0.92	0.94	0.92	0.9
R50-R69	0.98	1.07	0.91	0.98	0.95	0.92	0.95	0.97	1.01	1.01	1	1	1
C15-C26	2.1	2.09	2.1	2.15	2.18	2.11	2.1	2.08	2.13	2.07	2.09	2.08	2.01
I30-I52	0.99	0.98	1.01	0.95	1	0.91	0.96	1	1.02	1.05	1.03	1	0.98
C76-C80	3.26	3.18	3.35	3.41	3.38	3.34	3.3	3.19	3.29	3.21	3.15	3.26	3.19
Z40-Z54	0.76	0.77	0.76	0.84	0.8	0.8	0.77	0.76	0.77	0.75	0.74	0.7	0.73
I60-I69	1.12	1.03	1.19	1.15	1.16	1.06	1.15	1.14	1.14	1.12	1.09	1.11	1.05
K55-K63	0.54	0.56	0.53	0.61	0.58	0.54	0.56	0.56	0.57	0.53	0.54	0.51	0.48
J40-J47	1.38	1.36	1.41	1.41	1.38	1.37	1.4	1.41	1.43	1.39	1.4	1.37	1.33
I20-I25	0.61	0.53	0.7	0.61	0.63	0.62	0.63	0.62	0.62	0.62	0.6	0.56	0.53
N30-N39	0.84	0.83	0.84	0.88	0.88	0.84	0.87	0.86	0.88	0.85	0.81	0.81	0.76
K20-K31	0.6	0.68	0.54	0.63	0.64	0.55	0.59	0.57	0.6	0.6	0.61	0.6	0.62
J20-J22	1.27	1.35	1.21	1.29	1.28	1.21	1.25	1.24	1.29	1.3	1.29	1.27	1.31
S70-S79	0.97	1.16	0.89	0.92	0.96	0.92	0.94	0.95	0.95	1.01	1	0.98	0.99
A30-A49	1.89	1.83	1.96	2.05	1.94	1.93	1.84	1.91	1.96	1.94	1.83	1.82	1.82
T80-T88	0.84	0.88	0.8	0.84	0.88	0.83	0.85	0.86	0.85	0.83	0.81	0.83	0.82
N17-N19	1.64	1.63	1.66	1.77	1.7	1.63	1.63	1.61	1.65	1.72	1.64	1.56	1.58
I80-I89	0.66	0.65	0.67	0.77	0.7	0.61	0.67	0.63	0.62	0.62	0.67	0.65	0.7
K90-K93	1.09	1.16	1.02	1.11	1.08	1.02	1.08	1.07	1.11	1.13	1.11	1.07	1.09
I70-I79	1.08	1.01	1.18	1.13	1.1	1.03	1.05	1.05	1.08	1.08	1.1	1.06	1.06
K50-K52	0.82	0.87	0.78	0.73	0.83	0.83	0.84	0.8	0.84	0.88	0.82	0.79	0.81
S00-S09	0.74	0.84	0.63	0.78	0.68	0.68	0.73	0.7	0.71	0.76	0.73	0.76	0.76
C50-C50	1.17	1.53	1.17	1.31	1.3	1.21	1.2	1.15	1.16	1.09	1.12	1.12	1.07
C60-C63	1.17	1.18	NA	1.29	1.18	1.21	1.29	1.23	1.16	1.16	1.16	1.14	0.98
G30-G32	1.19	1.39	1.06	1.33	1.21	1.16	1.23	1.19	1.26	1.26	1.18	1.11	1.07

## Sheet: Weight
ICD10	Unstratified	Male	Female	SIMD 1	SIMD 2	SIMD 3	SIMD 4	SIMD 5	SIMD 6	SIMD 7	SIMD 8	SIMD 9	SIMD 10
J09-J18	0.034	0.0354	0.0329	0.0308	0.0287	0.0319	0.0312	0.0327	0.0331	0.036	0.0371	0.037	0.0376
R00-R09	0.0304	0.0319	0.029	0.0266	0.0283	0.0295	0.0286	0.0293	0.0301	0.0314	0.0309	0.0317	0.033
C30-C39	0.0304	0.0331	0.0281	0.022	0.0241	0.0255	0.027	0.0293	0.0299	0.0316	0.0325	0.0356	0.0383
R10-R19	0.03	0.0262	0.0334	0.03	0.0314	0.0305	0.0288	0.0294	0.0308	0.0291	0.0302	0.0301	0.0306
R50-R69	0.0284	0.0291	0.0278	0.0272	0.0266	0.0272	0.0282	0.0275	0.0286	0.0282	0.0294	0.0293	0.0302
C15-C26	0.0277	0.032	0.0238	0.0328	0.0314	0.03	0.0293	0.0286	0.028	0.0271	0.0265	0.025	0.0234
I30-I52	0.0261	0.0274	0.0249	0.027	0.0271	0.0259	0.0272	0.0275	0.0263	0.0272	0.0263	0.0249	0.0228
C76-C80	0.0236	0.022	0.0252	0.029	0.026	0.0262	0.0261	0.0246	0.0239	0.0224	0.0207	0.0219	0.0198
Z40-Z54	0.0222	0.023	0.0216	0.0248	0.025	0.0254	0.023	0.0233	0.0228	0.0215	0.0205	0.0194	0.0192
I60-I69	0.0207	0.0187	0.0225	0.021	0.021	0.0206	0.0223	0.0215	0.0211	0.0202	0.0203	0.0205	0.0192
K55-K63	0.0206	0.0197	0.0215	0.0243	0.024	0.0216	0.0212	0.0214	0.0215	0.0194	0.0196	0.0189	0.0176
J40-J47	0.02	0.0176	0.0223	0.0115	0.0129	0.0154	0.0164	0.0184	0.0198	0.0212	0.0236	0.0252	0.0274
I20-I25	0.0196	0.0211	0.0176	0.019	0.0203	0.0206	0.0208	0.0206	0.0203	0.0202	0.0197	0.0183	0.0165
N30-N39	0.0195	0.0165	0.0223	0.0224	0.0219	0.0219	0.0203	0.02	0.0199	0.0193	0.0181	0.0178	0.0166
K20-K31	0.0192	0.0209	0.0173	0.0172	0.0206	0.0174	0.0178	0.0182	0.0188	0.0186	0.0193	0.02	0.0213
J20-J22	0.0181	0.0186	0.0179	0.0147	0.0156	0.0166	0.0172	0.0176	0.0178	0.0186	0.0192	0.0196	0.0223
S70-S79	0.014	0.0098	0.0176	0.0143	0.0142	0.0153	0.0149	0.0145	0.0133	0.014	0.0136	0.0131	0.0128
A30-A49	0.0117	0.0112	0.0122	0.0112	0.011	0.0115	0.0118	0.0117	0.0119	0.0125	0.0119	0.012	0.0112
T80-T88	0.0117	0.0128	0.0106	0.0136	0.0134	0.0129	0.0129	0.0124	0.0116	0.0111	0.0105	0.0102	0.0097
N17-N19	0.0112	0.0119	0.0107	0.0106	0.0105	0.011	0.0112	0.0111	0.0113	0.012	0.0119	0.0113	0.0109
I80-I89	0.0102	0.0099	0.0106	0.0138	0.0129	0.0108	0.0109	0.0102	0.0097	0.009	0.0093	0.0089	0.0095
K90-K93	0.0095	0.0106	0.0084	0.0083	0.0086	0.0085	0.009	0.0088	0.0093	0.0097	0.0096	0.01	0.0113
I70-I79	0.0094	0.0105	0.0084	0.0089	0.0083	0.009	0.0094	0.0095	0.0096	0.0096	0.0099	0.0095	0.0094
K50-K52	0.0089	0.0076	0.0101	0.0076	0.0093	0.0094	0.009	0.0086	0.009	0.0093	0.0089	0.0087	0.0092
S00-S09	0.0088	0.0117	0.0063	0.0082	0.0069	0.0075	0.0082	0.008	0.0079	0.0087	0.0091	0.01	0.0113
C50-C50	0.0084	NA	0.0161	0.0135	0.0122	0.0106	0.0101	0.0087	0.0083	0.007	0.0067	0.0065	0.0055
C60-C63	0.0048	0.0101	NA	0.0084	0.0066	0.0062	0.0062	0.0055	0.0046	0.004	0.0038	0.0035	0.0026
G30-G32	0.001	0.0011	0.001	0.0013	0.0012	0.0012	0.0011	0.0009	0.001	0.001	0.0009	0.0009	0.0009
TOTAL	1	1	1	1	1	1	1	1	1	1	1	1	1

## Sheet: Incidence
ICD10	Unstratified	Male	Female	SIMD 1	SIMD 2	SIMD 3	SIMD 4	SIMD 5	SIMD 6	SIMD 7	SIMD 8	SIMD 9	SIMD 10
J09-J18	-0.19 (0.01)	-0.13 (0.02)	-0.24 (0.02)	-0.23 (0.06)	-0.25 (0.05)	-0.16 (0.05)	-0.16 (0.05)	-0.18 (0.05)	-0.16 (0.04)	-0.17 (0.04)	-0.20 (0.04)	-0.19 (0.04)	-0.19 (0.03)
R00-R09	0.16 (0.01)	0.20 (0.01)	0.12 (0.01)	0.11 (0.03)	0.12 (0.02)	0.11 (0.02)	0.11 (0.02)	0.10 (0.02)	0.13 (0.02)	0.20 (0.02)	0.18 (0.02)	0.21 (0.02)	0.22 (0.02)
C30-C39	0.32 (0.02)	0.44 (0.03)	0.19 (0.03)	0.24 (0.09)	0.34 (0.07)	0.39 (0.07)	0.48 (0.07)	0.36 (0.06)	0.39 (0.06)	0.31 (0.06)	0.32 (0.05)	0.27 (0.05)	0.26 (0.04)
R10-R19	0.11 (0.01)	0.13 (0.01)	0.09 (0.01)	0.03 (0.03)	0.07 (0.03)	0.11 (0.03)	0.11 (0.03)	0.11 (0.02)	0.14 (0.02)	0.11 (0.02)	0.12 (0.02)	0.11 (0.02)	0.12 (0.02)
R50-R69	0.08 (0.01)	0.13 (0.01)	0.03 (0.01)	0.03 (0.04)	0.03 (0.03)	0.04 (0.03)	0.11 (0.03)	0.07 (0.03)	0.09 (0.03)	0.11 (0.03)	0.10 (0.03)	0.08 (0.03)	0.07 (0.02)
C15-C26	0.27 (0.02)	0.29 (0.02)	0.23 (0.02)	0.26 (0.05)	0.28 (0.05)	0.31 (0.05)	0.26 (0.05)	0.32 (0.05)	0.23 (0.05)	0.24 (0.05)	0.28 (0.05)	0.23 (0.05)	0.27 (0.05)
I30-I52	0.23 (0.01)	0.23 (0.01)	0.21 (0.02)	0.16 (0.04)	0.27 (0.04)	0.19 (0.04)	0.17 (0.04)	0.19 (0.04)	0.23 (0.04)	0.22 (0.04)	0.25 (0.03)	0.28 (0.03)	0.30 (0.03)
C76-C80	0.22 (0.02)	0.27 (0.03)	0.19 (0.03)	0.06 (0.06)	0.18 (0.06)	0.17 (0.06)	0.33 (0.06)	0.20 (0.06)	0.21 (0.06)	0.17 (0.06)	0.24 (0.06)	0.29 (0.06)	0.36 (0.06)
Z40-Z54	-0.04 (0.01)	-0.03 (0.01)	-0.05 (0.01)	-0.03 (0.03)	-0.05 (0.03)	-0.01 (0.03)	0.02 (0.03)	0.01 (0.03)	-0.03 (0.03)	-0.03 (0.02)	-0.03 (0.02)	-0.08 (0.02)	-0.11 (0.02)
I60-I69	0.21 (0.01)	0.22 (0.02)	0.19 (0.02)	0.17 (0.06)	0.14 (0.05)	0.16 (0.05)	0.22 (0.05)	0.15 (0.05)	0.25 (0.04)	0.23 (0.04)	0.22 (0.04)	0.19 (0.04)	0.29 (0.04)
K55-K63	0.02 (0.01)	0.01 (0.01)	0.03 (0.01)	0.03 (0.03)	0.05 (0.02)	0.01 (0.02)	-0.00 (0.02)	0.04 (0.02)	0.04 (0.02)	0.06 (0.02)	0.05 (0.02)	0.02 (0.02)	-0.06 (0.02)
J40-J47	0.26 (0.01)	0.34 (0.02)	0.21 (0.02)	0.39 (0.08)	0.24 (0.07)	0.32 (0.06)	0.25 (0.06)	0.24 (0.05)	0.28 (0.05)	0.27 (0.04)	0.25 (0.04)	0.24 (0.04)	0.24 (0.03)
I20-I25	0.43 (0.01)	0.40 (0.01)	0.47 (0.02)	0.39 (0.03)	0.36 (0.03)	0.38 (0.03)	0.38 (0.03)	0.40 (0.03)	0.41 (0.03)	0.49 (0.03)	0.48 (0.02)	0.46 (0.02)	0.47 (0.02)
N30-N39	0.03 (0.01)	0.09 (0.02)	-0.02 (0.01)	0.12 (0.04)	0.07 (0.03)	0.04 (0.04)	0.06 (0.04)	0.02 (0.03)	0.00 (0.03)	0.02 (0.03)	-0.02 (0.03)	-0.00 (0.03)	-0.01 (0.03)
K20-K31	0.33 (0.01)	0.38 (0.01)	0.28 (0.01)	0.29 (0.03)	0.32 (0.03)	0.39 (0.03)	0.38 (0.03)	0.37 (0.02)	0.34 (0.02)	0.32 (0.02)	0.33 (0.02)	0.31 (0.02)	0.27 (0.02)
J20-J22	-0.13 (0.02)	-0.08 (0.02)	-0.17 (0.02)	-0.02 (0.07)	-0.14 (0.06)	-0.20 (0.06)	-0.10 (0.05)	-0.12 (0.05)	-0.08 (0.05)	-0.13 (0.04)	-0.12 (0.04)	-0.18 (0.04)	-0.15 (0.04)
S70-S79	0.12 (0.02)	0.09 (0.03)	0.13 (0.03)	0.02 (0.09)	0.06 (0.09)	0.15 (0.08)	0.14 (0.08)	0.09 (0.07)	0.17 (0.07)	0.06 (0.07)	0.12 (0.06)	0.12 (0.06)	0.15 (0.05)
A30-A49	-0.43 (0.02)	-0.40 (0.03)	-0.46 (0.03)	-0.35 (0.09)	-0.50 (0.08)	-0.31 (0.08)	-0.43 (0.07)	-0.41 (0.07)	-0.51 (0.07)	-0.43 (0.06)	-0.43 (0.06)	-0.49 (0.06)	-0.41 (0.06)
T80-T88	-0.05 (0.01)	-0.03 (0.02)	-0.08 (0.02)	0.01 (0.04)	-0.10 (0.04)	-0.07 (0.04)	-0.05 (0.04)	-0.06 (0.04)	-0.04 (0.04)	-0.02 (0.04)	-0.07 (0.04)	-0.14 (0.04)	0.01 (0.03)
N17-N19	0.04 (0.02)	0.09 (0.03)	-0.01 (0.03)	0.03 (0.10)	0.06 (0.09)	0.07 (0.09)	0.04 (0.08)	0.06 (0.08)	0.05 (0.07)	0.04 (0.07)	0.01 (0.07)	0.05 (0.06)	0.01 (0.06)
I80-I89	0.24 (0.01)	0.21 (0.01)	0.27 (0.01)	0.25 (0.03)	0.23 (0.03)	0.26 (0.03)	0.27 (0.03)	0.26 (0.03)	0.22 (0.03)	0.26 (0.03)	0.26 (0.03)	0.22 (0.03)	0.19 (0.03)
K90-K93	-0.04 (0.02)	0.02 (0.02)	-0.11 (0.02)	-0.14 (0.06)	-0.08 (0.06)	-0.06 (0.06)	0.01 (0.06)	0.03 (0.05)	-0.08 (0.05)	-0.05 (0.05)	0.01 (0.05)	-0.03 (0.04)	-0.05 (0.04)
I70-I79	0.44 (0.02)	0.39 (0.02)	0.51 (0.03)	0.56 (0.08)	0.48 (0.08)	0.50 (0.07)	0.42 (0.07)	0.41 (0.06)	0.48 (0.06)	0.46 (0.06)	0.38 (0.05)	0.37 (0.05)	0.46 (0.05)
K50-K52	0.34 (0.01)	0.36 (0.02)	0.33 (0.02)	0.36 (0.05)	0.44 (0.05)	0.33 (0.04)	0.41 (0.05)	0.37 (0.04)	0.36 (0.04)	0.38 (0.04)	0.31 (0.04)	0.30 (0.04)	0.24 (0.04)
S00-S09	0.19 (0.01)	0.26 (0.02)	0.05 (0.02)	0.04 (0.06)	0.04 (0.06)	0.13 (0.05)	0.17 (0.05)	0.10 (0.05)	0.20 (0.04)	0.18 (0.04)	0.21 (0.04)	0.24 (0.04)	0.31 (0.03)
C50-C50	0.20 (0.01)	NA	0.20 (0.02)	0.20 (0.05)	0.17 (0.04)	0.17 (0.05)	0.17 (0.05)	0.17 (0.05)	0.25 (0.05)	0.21 (0.05)	0.23 (0.05)	0.25 (0.05)	0.22 (0.05)
C60-C63	0.02 (0.03)	0.02 (0.03)	NA	-0.07 (0.09)	-0.12 (0.08)	-0.04 (0.10)	0.16 (0.09)	-0.04 (0.09)	0.12 (0.10)	0.10 (0.10)	0.10 (0.10)	0.07 (0.10)	-0.04 (0.10)
G30-G32	0.27 (0.08)	0.30 (0.10)	0.23 (0.13)	NA	NA	0.16 (0.28)	NA	0.18 (0.28)	0.11 (0.27)	0.27 (0.25)	0.15 (0.22)	0.27 (0.20)	0.43 (0.18)
TOTAL	0.13 (0.00)	0.16 (0.00)	0.10 (0.00)	0.10 (0.01)	0.11 (0.01)	0.13 (0.01)	0.15 (0.01)	0.13 (0.01)	0.14 (0.01)	0.13 (0.01)	0.14 (0.01)	0.12 (0.01)	0.13 (0.01)

## Sheet: Survival
ICD10	Unstratified	Male	Female	SIMD 1	SIMD 2	SIMD 3	SIMD 4	SIMD 5	SIMD 6	SIMD 7	SIMD 8	SIMD 9	SIMD 10
J09-J18	0.15 (0.04)	0.11 (0.06)	0.19 (0.03)	-0.08 (0.22)	0.19 (0.13)	0.05 (0.25)	-0.02 (0.14)	0.20 (0.12)	0.32 (0.16)	0.19 (0.06)	0.19 (0.09)	0.11 (0.10)	0.20 (0.07)
R00-R09	0.23 (0.04)	0.22 (0.05)	0.24 (0.05)	0.18 (0.15)	0.24 (0.11)	0.24 (0.12)	0.28 (0.10)	0.03 (0.09)	0.22 (0.09)	0.19 (0.06)	0.30 (0.07)	0.19 (0.06)	0.34 (0.09)
C30-C39	0.21 (0.05)	0.21 (0.04)	0.20 (0.07)	0.22 (0.23)	0.15 (0.19)	0.34 (0.18)	0.39 (0.20)	0.12 (0.15)	0.34 (0.11)	-0.11 (0.13)	0.22 (0.12)	0.26 (0.14)	0.19 (0.12)
R10-R19	0.12 (0.04)	0.10 (0.05)	0.13 (0.05)	0.33 (0.11)	-0.07 (0.08)	-0.08 (0.18)	0.17 (0.09)	0.02 (0.07)	0.15 (0.11)	0.15 (0.07)	0.16 (0.11)	0.09 (0.14)	0.16 (0.08)
R50-R69	0.03 (0.03)	0.07 (0.03)	-0.02 (0.04)	0.06 (0.13)	-0.13 (0.11)	-0.16 (0.08)	-0.16 (0.07)	-0.11 (0.04)	-0.09 (0.07)	0.22 (0.05)	0.14 (0.06)	-0.01 (0.06)	0.23 (0.06)
C15-C26	0.40 (0.04)	0.37 (0.05)	0.43 (0.05)	0.50 (0.10)	0.50 (0.13)	0.45 (0.16)	0.45 (0.07)	0.54 (0.15)	0.26 (0.10)	0.22 (0.12)	0.29 (0.12)	0.29 (0.12)	0.49 (0.14)
I30-I52	0.18 (0.02)	0.29 (0.03)	0.08 (0.03)	0.38 (0.11)	0.20 (0.07)	-0.04 (0.13)	0.28 (0.12)	0.23 (0.04)	0.25 (0.07)	0.26 (0.08)	0.12 (0.05)	0.04 (0.09)	0.07 (0.10)
C76-C80	0.37 (0.07)	0.21 (0.09)	0.50 (0.05)	0.35 (0.14)	0.06 (0.24)	0.46 (0.19)	0.43 (0.22)	0.28 (0.18)	0.58 (0.19)	0.48 (0.20)	0.52 (0.18)	0.41 (0.15)	-0.14 (0.25)
Z40-Z54	0.30 (0.04)	0.36 (0.06)	0.21 (0.03)	0.51 (0.12)	0.30 (0.12)	0.14 (0.06)	0.29 (0.07)	0.41 (0.07)	0.18 (0.09)	0.34 (0.06)	0.40 (0.08)	0.18 (0.11)	0.24 (0.05)
I60-I69	0.20 (0.03)	0.27 (0.05)	0.15 (0.04)	0.34 (0.10)	0.11 (0.07)	-0.03 (0.09)	0.06 (0.07)	-0.09 (0.18)	0.33 (0.08)	0.22 (0.12)	0.16 (0.13)	0.34 (0.18)	0.39 (0.10)
K55-K63	0.22 (0.02)	0.30 (0.03)	0.16 (0.03)	0.37 (0.10)	0.35 (0.12)	0.16 (0.10)	0.13 (0.05)	0.32 (0.08)	0.11 (0.06)	0.23 (0.08)	0.16 (0.04)	0.03 (0.05)	0.44 (0.07)
J40-J47	0.24 (0.05)	0.20 (0.08)	0.27 (0.04)	-0.05 (0.24)	0.30 (0.10)	0.22 (0.13)	0.30 (0.15)	0.11 (0.14)	0.09 (0.18)	0.22 (0.09)	0.18 (0.03)	0.37 (0.07)	0.32 (0.09)
I20-I25	0.26 (0.03)	0.35 (0.03)	0.17 (0.05)	0.27 (0.21)	0.27 (0.12)	0.10 (0.10)	0.37 (0.06)	0.23 (0.12)	0.29 (0.08)	0.24 (0.13)	0.41 (0.04)	0.18 (0.09)	0.24 (0.08)
N30-N39	-0.21 (0.04)	-0.29 (0.04)	-0.16 (0.05)	0.00 (0.07)	-0.13 (0.11)	-0.26 (0.07)	-0.28 (0.07)	-0.17 (0.07)	-0.16 (0.10)	-0.30 (0.14)	-0.17 (0.07)	-0.28 (0.07)	-0.32 (0.06)
K20-K31	0.13 (0.05)	0.11 (0.05)	0.16 (0.07)	-0.05 (0.10)	-0.11 (0.11)	0.01 (0.14)	0.39 (0.12)	0.06 (0.10)	0.11 (0.04)	0.02 (0.10)	0.16 (0.14)	0.18 (0.09)	0.28 (0.10)
J20-J22	-0.11 (0.02)	-0.09 (0.05)	-0.12 (0.03)	-0.32 (0.16)	-0.22 (0.08)	-0.07 (0.09)	-0.24 (0.08)	-0.17 (0.10)	-0.18 (0.11)	-0.11 (0.07)	0.14 (0.07)	-0.16 (0.06)	-0.03 (0.12)
S70-S79	-0.02 (0.02)	0.09 (0.06)	-0.07 (0.02)	0.26 (0.15)	-0.03 (0.10)	0.10 (0.10)	-0.22 (0.12)	-0.09 (0.07)	-0.12 (0.06)	0.16 (0.11)	-0.09 (0.11)	0.00 (0.12)	-0.18 (0.11)
A30-A49	0.06 (0.10)	0.02 (0.14)	0.12 (0.10)	0.32 (0.24)	-0.30 (0.23)	-0.33 (0.26)	-0.29 (0.14)	0.42 (0.22)	-0.61 (0.18)	0.53 (0.33)	0.37 (0.14)	0.13 (0.19)	-0.22 (0.17)
T80-T88	0.18 (0.06)	0.16 (0.10)	0.23 (0.05)	0.19 (0.25)	0.06 (0.15)	0.05 (0.06)	0.20 (0.16)	0.17 (0.06)	0.43 (0.10)	0.20 (0.15)	0.26 (0.12)	0.00 (0.11)	0.20 (0.09)
N17-N19	0.20 (0.06)	0.14 (0.06)	0.26 (0.08)	0.02 (0.25)	-0.09 (0.21)	0.23 (0.14)	0.01 (0.06)	0.53 (0.21)	0.18 (0.19)	0.20 (0.15)	0.11 (0.11)	0.43 (0.17)	0.15 (0.18)
I80-I89	0.24 (0.05)	0.37 (0.05)	0.09 (0.06)	0.42 (0.22)	0.05 (0.23)	0.10 (0.19)	0.62 (0.31)	0.21 (0.19)	0.08 (0.18)	0.49 (0.15)	0.28 (0.13)	0.06 (0.12)	0.14 (0.16)
K90-K93	0.19 (0.07)	0.22 (0.08)	0.12 (0.08)	-0.35 (0.13)	-0.08 (0.25)	-0.16 (0.20)	0.08 (0.16)	0.05 (0.16)	0.25 (0.13)	0.16 (0.09)	0.21 (0.14)	0.26 (0.15)	0.63 (0.16)
I70-I79	0.09 (0.04)	0.14 (0.04)	0.02 (0.06)	0.43 (0.20)	-0.11 (0.12)	0.09 (0.12)	0.26 (0.15)	0.26 (0.18)	0.04 (0.19)	-0.00 (0.14)	-0.05 (0.10)	0.06 (0.06)	0.07 (0.16)
K50-K52	0.12 (0.03)	0.14 (0.03)	0.09 (0.04)	-0.17 (0.16)	0.29 (0.13)	-0.12 (0.24)	-0.38 (0.20)	0.35 (0.13)	0.15 (0.11)	0.09 (0.08)	0.03 (0.13)	0.24 (0.11)	0.24 (0.10)
S00-S09	0.02 (0.05)	0.18 (0.05)	-0.16 (0.06)	-0.15 (0.18)	0.25 (0.16)	-0.05 (0.12)	-0.34 (0.15)	-0.21 (0.19)	0.22 (0.19)	-0.01 (0.18)	0.01 (0.08)	-0.09 (0.12)	0.18 (0.14)
C50-C50	1.16 (0.07)	1.15 (0.64)	1.15 (0.07)	0.56 (0.24)	1.74 (0.24)	1.70 (0.28)	1.45 (0.12)	1.17 (0.17)	1.59 (0.31)	0.96 (0.21)	0.88 (0.19)	1.03 (0.21)	0.81 (0.17)
C60-C63	0.70 (0.07)	0.70 (0.07)	NA	0.55 (0.27)	0.92 (0.19)	0.23 (0.19)	0.62 (0.19)	0.88 (0.22)	0.86 (0.19)	0.38 (0.24)	0.77 (0.13)	1.29 (0.28)	0.62 (0.16)
G30-G32	0.04 (0.14)	-0.04 (0.27)	0.06 (0.11)	0.15 (0.33)	0.25 (0.46)	-0.36 (0.33)	-1.27 (0.28)	0.88 (0.35)	0.45 (0.43)	-1.24 (0.59)	0.55 (0.42)	0.30 (0.28)	-0.43 (0.12)
TOTAL	0.19 (0.04)	0.19 (0.05)	0.18 (0.05)	0.22 (0.16)	0.16 (0.13)	0.12 (0.14)	0.18 (0.12)	0.17 (0.12)	0.19 (0.12)	0.18 (0.11)	0.21 (0.10)	0.16 (0.11)	0.20 (0.11)

## Sheet: Combined
ICD10	Unstratified	Male	Female	SIMD 1	SIMD 2	SIMD 3	SIMD 4	SIMD 5	SIMD 6	SIMD 7	SIMD 8	SIMD 9	SIMD 10
J09-J18	-0.02 (0.02)	-0.01 (0.03)	-0.04 (0.03)	-0.28 (0.12)	-0.03 (0.08)	-0.10 (0.12)	-0.17 (0.08)	0.04 (0.07)	0.16 (0.09)	0.03 (0.05)	0.01 (0.06)	-0.10 (0.06)	0.01 (0.05)
R00-R09	0.37 (0.02)	0.39 (0.03)	0.35 (0.02)	0.31 (0.08)	0.35 (0.06)	0.36 (0.06)	0.39 (0.05)	0.15 (0.05)	0.36 (0.05)	0.38 (0.04)	0.46 (0.04)	0.37 (0.03)	0.51 (0.05)
C30-C39	0.47 (0.03)	0.62 (0.03)	0.34 (0.04)	0.43 (0.14)	0.44 (0.12)	0.67 (0.11)	0.74 (0.12)	0.44 (0.10)	0.67 (0.08)	0.14 (0.08)	0.51 (0.08)	0.45 (0.08)	0.37 (0.07)
R10-R19	0.26 (0.02)	0.26 (0.03)	0.25 (0.03)	0.41 (0.06)	0.03 (0.05)	0.06 (0.09)	0.32 (0.05)	0.15 (0.04)	0.34 (0.06)	0.28 (0.04)	0.31 (0.06)	0.20 (0.07)	0.29 (0.05)
R50-R69	0.13 (0.02)	0.21 (0.02)	0.05 (0.02)	0.15 (0.07)	-0.04 (0.06)	-0.09 (0.05)	-0.02 (0.05)	-0.03 (0.04)	0.02 (0.05)	0.34 (0.04)	0.27 (0.04)	0.09 (0.04)	0.30 (0.04)
C15-C26	0.65 (0.02)	0.64 (0.03)	0.65 (0.03)	0.76 (0.07)	0.78 (0.08)	0.72 (0.09)	0.70 (0.06)	0.82 (0.09)	0.48 (0.07)	0.45 (0.07)	0.58 (0.07)	0.51 (0.08)	0.73 (0.08)
I30-I52	0.42 (0.02)	0.53 (0.02)	0.30 (0.02)	0.57 (0.07)	0.47 (0.05)	0.18 (0.07)	0.48 (0.07)	0.42 (0.04)	0.50 (0.05)	0.51 (0.05)	0.38 (0.04)	0.32 (0.06)	0.37 (0.06)
C76-C80	0.56 (0.04)	0.44 (0.05)	0.68 (0.04)	0.42 (0.10)	0.21 (0.13)	0.61 (0.11)	0.67 (0.12)	0.46 (0.11)	0.80 (0.11)	0.64 (0.11)	0.73 (0.11)	0.68 (0.09)	0.13 (0.13)
Z40-Z54	0.28 (0.02)	0.35 (0.03)	0.19 (0.02)	0.52 (0.07)	0.28 (0.06)	0.15 (0.04)	0.33 (0.04)	0.44 (0.05)	0.17 (0.05)	0.32 (0.04)	0.40 (0.05)	0.09 (0.06)	0.14 (0.04)
I60-I69	0.43 (0.02)	0.51 (0.03)	0.36 (0.03)	0.53 (0.08)	0.27 (0.06)	0.14 (0.07)	0.29 (0.06)	0.09 (0.09)	0.59 (0.06)	0.46 (0.07)	0.39 (0.07)	0.56 (0.09)	0.70 (0.06)
K55-K63	0.26 (0.01)	0.32 (0.02)	0.22 (0.02)	0.42 (0.05)	0.43 (0.06)	0.18 (0.06)	0.16 (0.03)	0.37 (0.05)	0.18 (0.04)	0.31 (0.04)	0.22 (0.03)	0.06 (0.03)	0.39 (0.04)
J40-J47	0.50 (0.03)	0.54 (0.04)	0.48 (0.03)	0.30 (0.14)	0.56 (0.08)	0.52 (0.09)	0.59 (0.09)	0.35 (0.08)	0.37 (0.10)	0.50 (0.06)	0.43 (0.04)	0.61 (0.05)	0.55 (0.06)
I20-I25	0.70 (0.02)	0.76 (0.02)	0.64 (0.03)	0.67 (0.10)	0.65 (0.06)	0.48 (0.06)	0.77 (0.04)	0.63 (0.06)	0.71 (0.05)	0.71 (0.07)	0.90 (0.03)	0.65 (0.05)	0.72 (0.05)
N30-N39	-0.23 (0.02)	-0.23 (0.03)	-0.22 (0.03)	0.11 (0.05)	-0.09 (0.06)	-0.23 (0.05)	-0.24 (0.05)	-0.18 (0.05)	-0.19 (0.06)	-0.32 (0.07)	-0.21 (0.05)	-0.33 (0.05)	-0.37 (0.04)
K20-K31	0.47 (0.02)	0.47 (0.03)	0.46 (0.04)	0.25 (0.06)	0.22 (0.06)	0.39 (0.07)	0.79 (0.06)	0.43 (0.06)	0.45 (0.03)	0.35 (0.05)	0.49 (0.07)	0.49 (0.05)	0.56 (0.05)
J20-J22	-0.23 (0.02)	-0.16 (0.03)	-0.28 (0.03)	-0.34 (0.11)	-0.35 (0.07)	-0.23 (0.07)	-0.32 (0.07)	-0.27 (0.07)	-0.26 (0.07)	-0.22 (0.06)	0.04 (0.05)	-0.34 (0.05)	-0.18 (0.07)
S70-S79	0.10 (0.02)	0.19 (0.04)	0.06 (0.03)	0.32 (0.11)	0.05 (0.10)	0.25 (0.09)	-0.07 (0.10)	0.01 (0.08)	0.05 (0.08)	0.23 (0.08)	0.03 (0.08)	0.13 (0.08)	-0.04 (0.08)
A30-A49	-0.38 (0.05)	-0.41 (0.07)	-0.33 (0.06)	-0.01 (0.15)	-0.78 (0.13)	-0.65 (0.15)	-0.72 (0.10)	-0.03 (0.13)	-1.12 (0.11)	0.10 (0.17)	-0.07 (0.09)	-0.36 (0.11)	-0.63 (0.10)
T80-T88	0.15 (0.03)	0.13 (0.05)	0.18 (0.03)	0.22 (0.12)	0.01 (0.08)	0.00 (0.05)	0.17 (0.09)	0.12 (0.05)	0.41 (0.06)	0.18 (0.08)	0.21 (0.07)	-0.12 (0.07)	0.21 (0.06)
N17-N19	0.21 (0.04)	0.21 (0.04)	0.22 (0.05)	0.04 (0.16)	-0.03 (0.14)	0.25 (0.11)	0.04 (0.09)	0.56 (0.13)	0.20 (0.12)	0.21 (0.10)	0.11 (0.08)	0.43 (0.10)	0.11 (0.10)
I80-I89	0.46 (0.03)	0.58 (0.03)	0.33 (0.03)	0.65 (0.11)	0.20 (0.11)	0.35 (0.10)	0.92 (0.15)	0.46 (0.10)	0.32 (0.09)	0.72 (0.08)	0.56 (0.07)	0.25 (0.07)	0.27 (0.09)
K90-K93	0.19 (0.04)	0.26 (0.05)	0.07 (0.04)	-0.44 (0.09)	-0.10 (0.13)	-0.16 (0.11)	0.15 (0.10)	0.12 (0.10)	0.21 (0.08)	0.14 (0.07)	0.25 (0.08)	0.28 (0.09)	0.57 (0.09)
I70-I79	0.52 (0.03)	0.53 (0.03)	0.51 (0.04)	0.92 (0.13)	0.34 (0.10)	0.57 (0.09)	0.66 (0.10)	0.67 (0.11)	0.48 (0.11)	0.45 (0.09)	0.34 (0.07)	0.44 (0.06)	0.49 (0.09)
K50-K52	0.45 (0.02)	0.50 (0.03)	0.42 (0.03)	0.17 (0.10)	0.72 (0.08)	0.20 (0.12)	-0.01 (0.11)	0.71 (0.08)	0.51 (0.07)	0.44 (0.06)	0.34 (0.08)	0.52 (0.07)	0.48 (0.06)
S00-S09	0.11 (0.03)	0.34 (0.03)	-0.15 (0.04)	-0.19 (0.11)	0.25 (0.10)	0.05 (0.08)	-0.20 (0.09)	-0.19 (0.10)	0.34 (0.10)	0.09 (0.09)	0.16 (0.06)	0.04 (0.07)	0.32 (0.08)
C50-C50	1.36 (0.04)	NA	1.35 (0.04)	0.78 (0.13)	1.92 (0.13)	1.88 (0.14)	1.64 (0.08)	1.34 (0.10)	1.82 (0.15)	1.18 (0.12)	1.06 (0.11)	1.27 (0.11)	1.00 (0.10)
C60-C63	0.76 (0.04)	0.76 (0.04)	NA	0.53 (0.15)	0.87 (0.13)	0.21 (0.13)	0.79 (0.13)	0.89 (0.14)	1.03 (0.13)	0.50 (0.15)	0.89 (0.12)	1.38 (0.17)	0.63 (0.13)
G30-G32	NA	0.28 (0.17)	0.30 (0.14)	NA	NA	NA	NA	NA	NA	NA	0.73 (0.30)	0.57 (0.25)	-0.00 (0.19)
TOTAL	0.31 (0.01)	0.35 (0.01)	0.28 (0.01)	0.34 (0.02)	0.28 (0.02)	0.25 (0.02)	0.33 (0.02)	0.30 (0.02)	0.33 (0.02)	0.31 (0.01)	0.35 (0.01)	0.27 (0.01)	0.31 (0.01)

## Sheet: Ratio
ICD10	Unstratified	Male	Female	SIMD 1	SIMD 2	SIMD 3	SIMD 4	SIMD 5	SIMD 6	SIMD 7	SIMD 8	SIMD 9	SIMD 10
J09-J18	0.45 (0.12)	0.47 (0.25)	0.45 (0.08)	0.26 (0.73)	0.43 (0.34)	0.25 (1.19)	0.10 (0.78)	0.53 (0.37)	0.67 (0.41)	0.53 (0.21)	0.48 (0.25)	0.35 (0.36)	0.51 (0.20)
R00-R09	0.60 (0.12)	0.52 (0.14)	0.67 (0.16)	0.62 (0.61)	0.67 (0.38)	0.68 (0.41)	0.72 (0.32)	0.21 (0.69)	0.63 (0.32)	0.48 (0.18)	0.62 (0.18)	0.48 (0.16)	0.61 (0.19)
C30-C39	0.39 (0.09)	0.33 (0.06)	0.52 (0.20)	0.48 (0.56)	0.31 (0.40)	0.47 (0.28)	0.45 (0.26)	0.24 (0.33)	0.47 (0.17)	0.26 (0.32)	0.41 (0.24)	0.49 (0.30)	0.42 (0.29)
R10-R19	0.53 (0.23)	0.43 (0.21)	0.59 (0.27)	0.92 (0.44)	0.51 (0.65)	0.42 (0.98)	0.60 (0.37)	0.17 (0.53)	0.53 (0.45)	0.57 (0.31)	0.57 (0.45)	0.47 (0.78)	0.58 (0.35)
R50-R69	0.25 (0.25)	0.36 (0.18)	0.39 (1.08)	0.67 (1.72)	0.79 (0.90)	0.80 (0.55)	0.59 (0.34)	0.61 (0.28)	0.48 (0.46)	0.66 (0.19)	0.59 (0.29)	0.11 (0.66)	0.77 (0.26)
C15-C26	0.60 (0.06)	0.55 (0.08)	0.65 (0.09)	0.66 (0.16)	0.64 (0.21)	0.59 (0.25)	0.63 (0.13)	0.63 (0.21)	0.53 (0.23)	0.47 (0.29)	0.51 (0.24)	0.56 (0.28)	0.64 (0.22)
I30-I52	0.44 (0.06)	0.55 (0.07)	0.27 (0.10)	0.70 (0.24)	0.43 (0.16)	0.16 (0.59)	0.63 (0.31)	0.55 (0.11)	0.53 (0.18)	0.55 (0.19)	0.31 (0.14)	0.13 (0.29)	0.19 (0.27)
C76-C80	0.62 (0.13)	0.44 (0.20)	0.72 (0.10)	0.86 (0.48)	0.26 (1.05)	0.73 (0.37)	0.57 (0.34)	0.59 (0.44)	0.74 (0.30)	0.73 (0.38)	0.68 (0.29)	0.59 (0.25)	0.28 (0.53)
Z40-Z54	0.89 (0.14)	0.93 (0.20)	0.82 (0.14)	0.94 (0.31)	0.87 (0.45)	0.93 (0.57)	0.94 (0.32)	0.97 (0.25)	0.86 (0.54)	0.91 (0.22)	0.93 (0.26)	0.68 (0.51)	0.68 (0.18)
I60-I69	0.49 (0.09)	0.54 (0.12)	0.45 (0.12)	0.67 (0.26)	0.45 (0.30)	0.18 (0.46)	0.21 (0.28)	0.38 (0.77)	0.57 (0.16)	0.50 (0.29)	0.43 (0.36)	0.64 (0.39)	0.57 (0.17)
K55-K63	0.92 (0.13)	0.97 (0.13)	0.84 (0.24)	0.93 (0.33)	0.87 (0.40)	0.96 (0.90)	0.99 (0.52)	0.89 (0.31)	0.72 (0.51)	0.80 (0.34)	0.78 (0.23)	0.61 (1.32)	0.87 (0.18)
J40-J47	0.48 (0.10)	0.38 (0.15)	0.56 (0.09)	0.12 (0.55)	0.56 (0.22)	0.41 (0.27)	0.54 (0.32)	0.31 (0.41)	0.25 (0.52)	0.45 (0.20)	0.42 (0.10)	0.61 (0.14)	0.57 (0.19)
I20-I25	0.38 (0.05)	0.46 (0.05)	0.26 (0.08)	0.41 (0.35)	0.43 (0.20)	0.21 (0.21)	0.50 (0.09)	0.36 (0.21)	0.41 (0.13)	0.34 (0.19)	0.46 (0.05)	0.28 (0.14)	0.33 (0.12)
N30-N39	0.89 (0.22)	0.76 (0.12)	0.89 (0.40)	0.01 (0.54)	0.65 (0.67)	0.87 (0.33)	0.82 (0.28)	0.91 (0.57)	0.99 (0.88)	0.93 (0.60)	0.90 (0.51)	0.99 (0.36)	0.98 (0.29)
K20-K31	0.29 (0.11)	0.22 (0.11)	0.35 (0.18)	0.15 (0.28)	0.25 (0.28)	0.03 (0.36)	0.50 (0.17)	0.14 (0.24)	0.24 (0.10)	0.06 (0.29)	0.33 (0.29)	0.37 (0.19)	0.51 (0.20)
J20-J22	0.45 (0.11)	0.53 (0.32)	0.41 (0.10)	0.94 (0.70)	0.62 (0.27)	0.25 (0.37)	0.70 (0.32)	0.59 (0.42)	0.68 (0.52)	0.46 (0.34)	0.54 (0.31)	0.47 (0.21)	0.17 (0.67)
S70-S79	0.14 (0.16)	0.50 (0.39)	0.34 (0.13)	0.92 (0.78)	0.32 (1.23)	0.40 (0.46)	0.61 (0.41)	0.50 (0.47)	0.42 (0.25)	0.72 (0.63)	0.42 (0.57)	0.02 (1.00)	0.55 (0.41)
A30-A49	0.13 (0.21)	0.05 (0.33)	0.20 (0.17)	0.48 (0.40)	0.38 (0.30)	0.51 (0.47)	0.40 (0.21)	0.51 (0.30)	0.54 (0.18)	0.55 (0.39)	0.46 (0.19)	0.21 (0.31)	0.35 (0.28)
T80-T88	0.77 (0.34)	0.86 (0.70)	0.75 (0.22)	0.96 (1.77)	0.38 (1.05)	0.44 (0.56)	0.81 (0.86)	0.75 (0.36)	0.92 (0.31)	0.89 (0.92)	0.79 (0.47)	0.00 (0.85)	0.97 (0.60)
N17-N19	0.83 (0.32)	0.61 (0.32)	0.96 (0.43)	0.38 (4.95)	0.59 (1.70)	0.78 (0.65)	0.12 (1.36)	0.89 (0.49)	0.78 (1.11)	0.84 (0.86)	0.89 (1.19)	0.89 (0.48)	0.93 (1.53)
I80-I89	0.50 (0.11)	0.64 (0.11)	0.25 (0.18)	0.62 (0.40)	0.18 (0.81)	0.28 (0.56)	0.70 (0.42)	0.45 (0.44)	0.26 (0.62)	0.66 (0.24)	0.52 (0.27)	0.21 (0.44)	0.42 (0.54)
K90-K93	0.83 (0.41)	0.91 (0.47)	0.51 (0.37)	0.72 (0.33)	0.49 (1.78)	0.75 (1.17)	0.86 (2.48)	0.59 (2.44)	0.76 (0.50)	0.78 (0.61)	0.95 (0.86)	0.88 (0.71)	0.92 (0.32)
I70-I79	0.17 (0.07)	0.26 (0.09)	0.04 (0.11)	0.43 (0.23)	0.19 (0.22)	0.15 (0.21)	0.38 (0.24)	0.39 (0.29)	0.08 (0.36)	0.01 (0.29)	0.11 (0.24)	0.14 (0.15)	0.12 (0.31)
K50-K52	0.25 (0.07)	0.28 (0.06)	0.22 (0.09)	0.32 (0.32)	0.40 (0.20)	0.28 (0.55)	0.48 (0.29)	0.49 (0.20)	0.29 (0.23)	0.20 (0.18)	0.08 (0.40)	0.45 (0.23)	0.50 (0.25)
S00-S09	0.08 (0.24)	0.41 (0.12)	0.74 (0.36)	0.80 (1.27)	0.87 (0.77)	0.26 (0.69)	0.67 (0.37)	0.67 (0.72)	0.53 (0.53)	0.03 (0.96)	0.05 (0.37)	0.28 (0.36)	0.37 (0.31)
C50-C50	0.85 (0.07)	NA	0.85 (0.07)	0.74 (0.39)	0.91 (0.17)	0.91 (0.21)	0.89 (0.10)	0.87 (0.17)	0.87 (0.22)	0.82 (0.24)	0.79 (0.22)	0.80 (0.21)	0.78 (0.21)
C60-C63	0.97 (0.14)	0.97 (0.14)	NA	0.89 (0.59)	0.89 (0.25)	0.85 (0.97)	0.79 (0.32)	0.96 (0.35)	0.88 (0.27)	0.80 (0.68)	0.89 (0.23)	0.95 (0.29)	0.93 (0.36)
G30-G32	0.12 (0.47)	0.11 (0.80)	0.22 (0.40)	NA	NA	0.69 (0.86)	NA	0.83 (0.49)	0.81 (1.07)	0.82 (0.52)	0.79 (0.80)	0.53 (0.57)	0.50 (0.19)
TOTAL	0.59 (0.15)	0.54 (0.17)	0.65 (0.21)	0.68 (0.59)	0.59 (0.58)	0.48 (0.64)	0.54 (0.42)	0.58 (0.45)	0.58 (0.41)	0.57 (0.41)	0.61 (0.32)	0.57 (0.44)	0.60 (0.38)
